# Supplementary material for: Loss of miR-16-1-3p Activity Predicts Chemoresistance and Progression in Osteosarcoma: An Integrative Clinicopathologic Study
Source: Research Square preprint supplement (doi:10.21203/rs.3.rs-7665473/v1), 2025-11-13
Supplement: Supplementary file 1 [file 3998a3558fc2270a9ef35231.xlsx]

## Sheet: Table 3A
gene_name	TARGET.40.0A4I4O.Dead	TARGET.40.0A4I0Q.Dead	TARGET.40.0A4I42.Dead	TARGET.40.0A4I6O.Dead	TARGET.40.0A4HY5.Dead	TARGET.40.0A4HXS.Alive	TARGET.40.0A4I0W.Alive	TARGET.40.0A4I65.Alive	TARGET.40.0A4HMC.Alive	TARGET.40.0A4I5B.Alive	TARGET.40.0A4I48.Alive	TARGET.40.0A4I4M.Alive	TARGET.40.0A4I9K.Alive	TARGET.40.0A4I8U.Alive	TARGET.40.0A4I3S.Alive
FGF2	0.959993	1.04068	0.1396	1.23677	2.05256	0.831391	0.685716	0.0897693	0.0444641	0.618521	0.20201	0.558757	0.370945	0.43189	0.876173
FOSL2	6.97863	7.86612	7.52101	8.03088	7.41605	6.60072	6.96805	7.07417	7.47746	7.72353	7.16987	5.95673	7.11254	6.07251	5.73845
APLN	5.71156	7.15408	5.89468	9.63058	6.73353	5.26534	6.83721	3.35538	4.43159	5.39831	6.1133	4.58514	4.53827	4.06814	5.20553
SREK1	3.95753	4.39138	4.10355	3.3897	3.42408	3.63426	2.1819	2.63148	2.87169	3.83042	2.84266	2.44037	3.05932	3.27828	3.31525
RAB30	2.72336	3.84939	3.32907	3.36959	2.29305	2.81106	2.37848	2.22076	1.93591	2.96066	2.60945	2.39303	2.59548	2.19698	2.50594
SIRT4	3.39424	2.99445	2.99516	3.07984	2.8401	2.09623	1.61042	2.08926	2.25487	3.17741	2.97188	2.22395	1.90061	2.47454	2.22042
PAFAH1B1	5.45706	5.47759	4.67391	5.64222	4.95006	4.51265	3.86188	5.19031	4.49432	4.77868	4.54235	4.08925	4.81	4.58044	4.46226
SLC25A37	5.2311	4.25889	4.26324	4.36763	6.63874	3.7668	4.17234	4.00651	4.44256	4.35363	4.16356	3.50246	3.34446	4.04966	4.30969
SMS	6.36472	6.47322	6.25327	7.7846	7.87713	6.46393	5.40909	6.19533	6.6819	5.94832	5.62535	5.50424	6.21285	6.28307	6.55185
IPPK	2.61103	2.08885	2.06381	2.45757	3.10494	2.02857	1.50284	1.36087	2.05617	2.74784	2.53565	1.77391	1.65659	1.9584	1.67902
C1QL3	0.500496	2.0635	1.76167	2.1113	1.6204	1.30434	2.03309	0.0373119	0.152508	0.988194	0	0.0384362	0.815575	1.26694	0.925696
RNF144B	5.9659	4.92803	3.32266	4.77918	4.85061	3.72484	1.68244	1.73114	2.68977	5.19071	2.75262	3.14308	1.69372	3.10969	2.74476
CDC27	5.79977	5.91937	5.38165	6.30907	6.26956	5.81135	5.25816	5.55478	4.44553	5.48796	5.18801	5.29387	5.18031	4.5429	5.16854
VEGFA	10.1216	7.34816	7.62134	7.53595	7.08914	3.95653	6.16885	4.76918	5.72348	4.31471	5.06834	2.98634	4.64276	4.88537	4.61397
RPS6KA3	5.70843	5.6509	6.83887	5.58543	5.31732	4.6649	4.24753	6.01745	4.125	4.9641	4.88118	4.2323	6.42021	4.87717	4.74627
NAPG	5.21348	4.8245	4.97059	4.98747	5.1514	4.54385	2.32441	4.12958	3.4636	5.55159	3.91976	4.33618	4.94509	3.89712	3.71889
ATG14	5.15805	4.84034	4.20188	5.06906	4.16397	3.53104	3.42459	3.559	4.63118	4.3869	4.30351	3.25304	4.46323	4.11423	3.92624
BTAF1	5.36451	4.4654	4.47895	4.00772	4.5413	3.75418	3.35007	3.52184	3.84594	4.70431	3.56591	3.1102	3.34968	3.48912	4.95767
CLDN12	4.33922	4.48423	4.35691	5.41088	3.55688	3.83862	3.0061	3.87543	3.54217	4.04754	3.53672	3.19541	3.66788	3.14494	4.65159
E2F7	3.54998	3.84369	2.75119	5.23531	3.6102	2.10551	2.45983	4.23598	2.24492	4.02202	2.64906	1.78463	1.76413	1.82098	2.88731
TMEM161B	2.2809	2.65249	3.29635	2.03924	2.79273	1.63371	1.55915	1.61626	1.80785	2.74818	1.88084	1.68881	1.7327	1.90866	2.46467
SPAG7	6.13942	5.92527	4.55713	5.33981	5.71853	4.84481	4.13298	4.87399	5.5023	5.36806	4.33493	4.13006	5.0573	5.01417	4.35999
NRN1	5.79833	7.66588	6.90983	7.54269	6.44646	5.07045	5.52555	4.21869	5.12002	5.64816	5.07107	4.23734	7.0319	5.05746	5.51547
DDX3X	5.85583	6.71896	6.47606	6.27738	6.25463	5.33054	4.96769	5.95631	5.1207	6.10962	5.57264	5.62128	6.26664	4.91254	6.1071
TFRC	5.96023	5.58269	6.64695	6.93739	6.26263	5.44473	4.68262	4.30135	5.04815	6.10861	5.87429	4.60769	6.17778	4.99814	5.30844
ZNF449	3.14724	3.09919	3.01741	3.0985	2.17329	2.36706	2.53421	1.63793	1.82383	2.40882	2.42533	2.19799	3.23472	2.13593	2.66728
AIFM1	3.35954	3.38785	3.45336	4.52788	3.47125	3.63884	1.80248	2.18323	3.00412	3.28969	3.04065	3.13256	3.6169	2.48045	3.27144
CHAC1	5.11181	4.52204	4.00594	4.93667	3.8096	3.38796	4.37958	2.80744	1.71092	2.60155	2.68399	2.83297	3.51513	4.15409	3.8318
PHKA1	0.107822	3.61254	2.91071	4.82391	3.23014	1.57129	1.72879	1.45539	1.41186	1.52532	0.68446	0.992188	1.62101	0.460376	3.69968
MAP2K1	6.62833	6.17995	7.42786	6.51289	5.429	5.88043	5.27051	5.3773	5.18117	6.31603	6.29086	6.06043	5.73689	5.14078	5.8257
ELL2	6.17044	6.04537	7.05006	5.03269	5.7788	4.61389	4.21924	5.41091	4.35728	6.13998	4.85796	4.62846	4.30366	4.57001	4.40243
PSAT1	7.58614	7.83279	6.3087	8.53406	6.91464	8.49677	6.20592	4.14863	4.12957	6.26808	5.55861	6.54039	6.36539	6.16192	6.36629
SLC2A3	7.10297	5.72139	5.55914	7.814	4.79976	3.3087	4.69503	3.71165	5.70344	4.94323	5.16121	3.35293	4.6093	3.64771	4.15871
SYDE2	2.42043	2.6565	3.93151	2.18774	3.05384	2.07659	1.23707	2.33531	2.07673	2.78434	2.69214	2.31412	2.15953	1.86703	1.86104
SNX11	4.89596	3.95993	5.01723	4.71104	4.5119	4.52286	3.13849	3.83888	3.80488	4.79574	4.14731	4.53273	4.03186	3.33203	3.61057
BOLA3	2.26802	2.40035	3.26749	3.07279	2.70352	2.50027	2.00169	1.26069	2.26676	2.2405	2.51402	2.14467	2.57701	2.244	2.56922
BTF3	7.49076	8.24288	7.44948	6.25482	7.50963	6.84951	6.52592	6.57384	6.72772	6.84371	6.9041	6.68538	6.41946	7.38679	6.75943
USP12	4.50662	4.17364	4.42659	3.95358	4.44428	3.61845	3.1828	3.69792	4.36692	4.41333	3.59927	3.50645	3.83314	4.22989	4.12847
PRKAB2	5.32567	5.4511	6.00342	6.55857	4.4783	5.07453	4.47821	4.70415	4.25267	5.36496	4.63812	4.46955	4.6368	5.11602	5.10611
DZIP1	4.28888	3.92166	4.76061	4.02703	4.91922	4.17141	2.84334	3.41229	3.56394	4.57413	3.94621	2.7054	3.66556	3.45447	3.75202
SEC24A	4.23658	5.6866	6.03483	4.93957	5.69465	5.27025	4.21304	4.38641	3.88353	4.83812	3.64078	3.66692	4.82048	3.92683	5.24477
WDFY2	2.8908	2.06492	2.70033	1.96436	2.12558	1.66993	1.68634	1.35276	1.91617	2.15157	1.56672	1.86521	2.45741	1.80132	2.04278
CTDSP2	7.15569	10.0035	8.5271	7.32058	7.09179	6.37759	6.41022	7.38109	6.42418	7.26004	7.21684	6.57861	6.82456	7.07097	7.54334
ZBTB43	4.18799	3.79642	3.5669	4.88217	4.38733	3.97147	3.0708	2.89245	3.19314	3.93743	3.29411	2.8641	3.2655	3.41824	4.48738
PRR15L	0.538538	0.755144	0.225768	0.931607	1.66717	0.22367	0	0.451119	0.049352	0.0743684	0.608809	0	0.438825	0.1038	0.675726
NEBL	1.43797	0.358396	2.23918	0.92235	3.11838	0.169027	0.61438	0.343351	1.15244	1.29965	0.171975	0.404794	0.11929	0.499374	2.00813
SLC39A9	6.50291	6.10331	6.32683	6.09386	5.64365	6.10408	5.6233	5.111	5.74217	5.69868	5.24104	5.17186	6.00691	4.21472	5.55981
TRAM1	7.55413	7.97157	8.37658	8.20525	8.03339	7.15525	7.51579	8.1437	7.47817	8.05728	7.50542	7.40032	7.74799	7.4327	7.71325
RASEF	0.631058	0.0467006	0.302407	2.56599	0.68437	0.0183493	0.173895	0.0399806	0.203514	0.0683269	0.121148	0.0137838	0	0.0768327	0.812786
SLC15A4	6.1161	4.97853	5.43566	4.84218	4.99308	4.78441	4.52322	4.87526	3.99323	4.13972	4.43694	4.53108	4.83417	4.41315	4.13801
FOSL1	6.34433	5.41797	3.7449	8.12609	6.56396	3.18976	4.66602	5.09184	3.95076	3.94032	5.05595	4.56626	4.31119	2.19853	3.97887
SPTLC1	5.54303	5.7194	4.71452	5.80161	5.75321	5.62413	5.18901	4.37536	4.73632	5.40414	4.53	4.84219	5.15833	4.22202	5.01505
FOXK1	5.77522	5.34491	4.55379	4.86063	5.45717	4.32258	4.3184	4.17045	4.23293	5.12963	5.60795	3.71737	5.00962	4.82629	4.20324
HMGCR	4.71718	4.06461	4.89037	5.02793	4.30513	4.07902	3.70794	3.43936	3.85434	5.15042	3.49335	3.72989	3.46083	3.9275	4.57941
CMPK1	6.98581	6.85208	7.46045	7.35998	7.56074	7.16952	6.69362	6.22927	6.48925	6.76045	6.67073	6.51666	7.0873	6.30745	6.34423
CHD2	4.81088	4.47129	4.59058	4.08979	4.33499	4.34232	2.70064	2.81541	4.21391	4.54345	3.61693	2.91273	3.59948	2.68728	3.81476
EGLN1	5.38778	3.40181	5.01648	2.18663	3.97484	2.20442	2.40059	2.78228	3.14393	3.46996	3.30473	2.35657	2.48476	2.77993	3.54335
CHPT1	3.56532	4.62515	4.3593	3.9855	4.73395	3.69559	2.71141	4.06331	3.16794	3.44292	3.59519	3.27934	2.4689	4.04149	4.28587
SLC6A4	0.310224	0.585347	0.303576	0.832282	0.560617	0.101919	0.149389	0.420294	0.250598	0.378623	0.115433	0.138814	0.141956	0.176578	0.247441
ZC3H6	2.70469	2.9454	2.42865	1.82526	2.19689	1.38383	1.39039	1.78413	1.5202	2.25825	1.69497	1.43307	2.43896	1.77876	1.40256
DCAF5	5.68796	5.11587	5.57386	5.4478	4.45259	4.89683	4.69683	4.30416	4.90218	4.94126	4.94395	4.39645	5.01704	4.72561	5.23248
RAB40A	0.986156	1.02333	0.378401	0.85583	0.868134	0.059909	0.554245	0.282855	0.161823	0.423309	0.520548	0.110764	0.512884	0.226139	1.05228
UBN2	3.43808	2.96839	3.2708	3.23059	2.7185	2.96346	2.15578	2.49976	2.3667	3.38257	2.15956	2.21819	3.14458	2.62754	2.81936
DCUN1D5	2.87878	3.42512	3.48566	3.72576	4.21592	3.80081	2.27605	2.60165	2.71176	2.81637	2.67154	2.45749	3.44074	2.21001	2.70184
PTGFR	5.06512	7.28426	1.57826	7.5903	5.96747	4.93814	4.52405	3.33491	2.13809	2.97816	3.53457	3.65901	1.96266	2.85431	2.231
NPEPPS	4.66547	4.4938	4.58858	5.07623	4.31501	3.99671	3.83256	3.84993	3.49374	3.90364	3.6272	3.82902	3.44589	3.28309	4.03901
CAST	5.2239	5.13079	5.87159	5.79732	4.86199	3.95052	4.0415	4.22492	4.10624	4.73749	4.40274	4.48448	4.67466	4.40909	4.63044
RELT	3.73959	3.32503	5.04063	3.5519	3.97297	2.47423	1.83342	3.10852	3.14501	4.29395	3.81134	3.40229	2.71046	2.5763	2.8695
AFF4	4.81076	5.42958	5.8324	5.28991	5.36039	5.55514	4.37855	4.95268	4.36447	5.33128	4.40173	4.04343	4.65687	4.52153	5.44592
SLC7A1	5.32601	5.26463	5.53218	5.5963	5.38789	5.22044	4.50567	4.47709	3.71802	3.87385	4.9424	3.52212	4.41154	5.06967	5.64012
SAMD4A	5.25324	4.64769	5.49776	3.92975	3.96273	3.53874	3.7233	3.75851	3.71765	4.27385	4.61251	2.59488	3.86882	3.59917	2.59965
NUP37	3.50316	3.77707	3.43252	4.21596	4.21929	3.25129	2.63592	3.47529	2.73377	3.58765	2.66421	3.35923	3.13609	3.20151	4.0981
CACNB1	4.52296	3.33915	3.18419	3.12325	4.05056	3.36975	2.44657	3.284	2.39813	2.98896	3.35397	3.78544	2.1897	2.19068	2.17967
ZNF654	4.35466	3.93638	3.7433	4.1524	3.40889	2.44866	3.39892	2.55383	3.11188	3.61452	2.96807	2.56343	3.081	2.54206	4.93791
RORA	3.99653	4.15835	1.95684	4.53488	2.62529	2.5143	2.37515	1.62349	1.05242	1.65732	1.03949	1.47368	1.48985	1.52155	2.94163
ZNF367	4.79854	4.14489	3.41479	3.96597	4.62076	4.22103	3.03896	3.48531	2.58885	4.27032	3.75788	3.4173	3.70847	2.69631	3.96353
AMMECR1	4.13891	3.64608	3.93422	5.4038	4.48079	3.25825	2.78557	3.03568	2.63949	3.68318	3.70231	2.29549	3.8842	2.72233	4.0987
AMOT	5.53793	5.26878	4.70216	6.10189	4.12075	5.54857	3.15381	4.82022	3.14833	4.08871	4.76648	3.37262	4.7579	4.27774	3.55283
CDCA2	4.17867	4.41887	3.974	5.36681	5.50036	3.39119	3.20058	3.97831	2.58904	4.51104	2.51657	2.17066	3.99292	2.14971	4.02679
A4GNT	0.583423	0.775683	0.312549	0.12618	0.588613	0.067501	0.105142	0	0.591105	0.346872	0.218595	0.443925	0.0714881	0.0718999	0
CAPN6	1.82314	3.08425	0.196859	7.50755	4.96797	1.02638	0.397474	2.89887	0.536152	0.126048	1.97251	0.0764223	1.45328	0.27023	1.23634
AGAP2-AS1	2.22598	5.37911	3.71864	0.769772	2.32285	1.98284	1.31823	0.413052	1.65769	1.49922	0.313246	0.597221	1.39243	0.670025	1.6617
FNIP2	4.22655	3.64549	4.70155	5.09375	3.46558	3.41054	3.8562	3.32842	3.71824	3.84974	3.0554	3.36356	4.24279	3.35987	3.8937
OGT	6.32744	6.79909	6.51121	5.50154	5.52569	4.91982	5.02755	4.89927	4.15892	5.40779	5.11293	4.17912	5.54498	5.87535	6.3313
ETV3	4.3247	5.02139	5.01978	5.7191	4.94167	4.76342	4.01842	3.95449	4.30722	5.28979	4.49299	4.15466	4.4363	4.38191	4.49902
BEST4	1.22256	2.32659	1.73552	3.35455	1.27923	0.0480967	1.40114	0.694747	0.978489	0.797428	1.42196	0.267955	0.719841	0.793272	0.863463
BHLHE41	4.5591	6.56401	4.8934	6.91744	5.21029	2.91909	5.15853	2.70033	4.08676	2.95901	4.79807	2.85868	4.4847	3.54773	3.88387
EXOC5	4.9606	4.37213	4.48638	4.95394	4.17698	4.28491	3.82046	3.93526	4.3199	4.7781	3.94159	3.50209	4.13864	3.58478	4.36486
PHF21A	4.33862	4.51235	4.42132	3.81382	4.51886	4.3439	2.57942	3.62295	3.52087	3.94602	3.93255	2.86198	4.23127	3.32338	4.05955

## Sheet: Table 3B
gene_name	TARGET.40.0A4I4O.Dead	TARGET.40.0A4I0Q.Dead	TARGET.40.0A4I42.Dead	TARGET.40.0A4I6O.Dead	TARGET.40.0A4HY5.Dead	TARGET.40.0A4HXS.Alive	TARGET.40.0A4I0W.Alive	TARGET.40.0A4I65.Alive	TARGET.40.0A4HMC.Alive	TARGET.40.0A4I5B.Alive	TARGET.40.0A4I48.Alive	TARGET.40.0A4I4M.Alive	TARGET.40.0A4I9K.Alive	TARGET.40.0A4I8U.Alive	TARGET.40.0A4I3S.Alive
EXOSC8	4.72456	3.9954	4.31809	3.46057	4.45927	3.50838	2.78595	3.51778	3.61389	4.44848	3.2833	3.64598	3.42636	3.11222	4.08161
VCPKMT	5.15057	4.1547	5.60357	4.41049	3.73321	4.08734	3.30052	3.2011	4.12963	4.34597	3.32061	3.30134	4.42155	3.94102	4.28047
TRIQK	4.92633	4.65383	4.10759	3.56756	4.1839	4.09759	3.61672	3.37665	3.34514	4.0002	3.81275	3.61064	4.00531	3.68621	3.73176
UQCRB	5.05621	4.07061	4.76831	4.42215	3.88118	3.47588	3.42738	3.48751	4.00475	4.15933	3.4646	3.8331	3.43331	4.84898	4.14158
AIMP1	4.30227	4.63226	4.19398	4.31438	4.75979	4.30997	3.81893	3.28666	3.51178	4.15701	3.45008	3.71916	3.53502	4.40824	3.86873
TSFM	0.870818	2.82412	1.59029	0.856707	0.476019	0.563256	0.931532	1.01878	0.260748	0.512884	0.708849	0.286526	0.325502	0.574053	1.20608
IL23A	1.50594	2.04065	0.595981	2.36261	2.9722	1.10896	1.537	0.882995	1.02482	1.32498	1.57337	0.903501	0.756853	1.16034	1.62448
CCDC112	2.71574	3.55273	2.24632	3.386	3.26231	2.97142	1.42175	1.4936	2.19676	2.77309	1.72683	1.81721	1.86307	2.29443	2.96586
NUDT15	4.53709	4.33793	4.947	5.08704	4.98251	3.71961	3.95606	4.00952	4.30439	4.93991	3.60706	4.18051	4.22881	3.45252	4.97886
CDADC1	2.8779	2.99357	3.06994	3.22643	2.94143	2.56482	1.52562	1.50294	2.82597	2.93261	1.60999	2.30232	2.99366	2.29675	2.76326
CCNG2	5.10768	5.2005	4.57259	4.6298	3.73495	3.90028	3.58165	3.7392	4.01531	4.5363	3.17212	3.82676	4.2298	3.3426	5.17411
GLMN	3.77932	3.97069	3.91733	4.3642	4.49955	3.2638	2.56365	3.65757	3.00856	4.09293	3.84784	3.76547	2.87978	3.90834	4.02462
DNAJC2	4.16276	4.06926	3.848	4.87813	4.41193	4.09741	2.39405	2.68305	3.54842	3.99997	2.75003	2.97506	3.91484	3.70201	3.21708
SFXN1	4.90998	4.94377	4.76884	4.51436	5.24475	4.64443	4.14095	4.85725	3.54442	4.8267	4.56893	3.5079	4.25007	4.00682	4.68098
SPAG7	6.13942	5.92527	4.55713	5.33981	5.71853	4.84481	4.13298	4.87399	5.5023	5.36806	4.33493	4.13006	5.0573	5.01417	4.35999
SLC25A46	4.00209	4.6813	4.79107	4.50573	4.38298	4.26059	3.44685	3.71154	3.56354	4.34804	3.51498	3.94638	3.83216	4.11416	4.94909
PDK1	5.31012	3.61337	4.7358	3.57072	3.50358	3.464	1.87747	2.25471	2.20336	1.97324	2.40395	1.1462	2.85844	1.33994	2.72875
LOX	7.78579	9.37804	10.5653	7.60287	8.11139	7.98622	6.968	8.22042	7.12057	8.17624	6.87022	5.00546	7.28332	6.79424	7.49756
RASEF	0.631058	0.0467006	0.302407	2.56599	0.68437	0.0183493	0.173895	0.0399806	0.203514	0.0683269	0.121148	0.0137838	0	0.0768327	0.812786
MTDH	8.17916	6.73394	6.86464	7.25119	7.92314	6.35639	6.58709	7.22414	6.22572	7.28888	6.79416	5.99852	6.93003	7.32413	6.85358
ZDHHC17	3.59103	4.10719	4.02224	3.88033	3.42032	3.3742	2.569	2.9361	3.11638	3.91256	3.01361	2.99338	3.30375	3.37934	3.44747
SNX24	3.63241	4.19863	4.79486	3.47748	4.27563	3.74479	3.11892	3.27995	2.63269	3.75296	3.40748	3.33311	3.17484	3.49408	4.45563
SCAI	2.45667	2.61967	2.16337	3.097	2.31034	2.27944	2.18174	2.41654	1.67224	2.62211	2.32861	1.62518	1.44604	1.79323	2.32251
REEP5	5.8007	6.49551	6.39822	6.30873	6.1197	5.99494	5.49464	5.76379	5.76183	6.22233	5.96795	5.9531	6.17489	6.12423	6.01718
KTN1	5.52928	4.97471	5.08989	5.91256	5.54484	4.76215	3.77715	4.08779	5.23991	5.4605	4.17156	4.45129	4.75133	5.20799	4.45533
SNTB1	5.09999	4.90372	2.75796	5.79191	3.87833	4.05489	3.58588	3.65958	2.6933	3.84856	2.93727	3.24658	1.73937	3.35027	2.99738
MRGBP	5.08633	5.92295	5.6342	5.10804	5.84311	4.86459	3.37553	4.61272	5.35537	5.4525	4.92565	4.6079	4.87186	4.32606	3.58879
TMEM161B	2.2809	2.65249	3.29635	2.03924	2.79273	1.63371	1.55915	1.61626	1.80785	2.74818	1.88084	1.68881	1.7327	1.90866	2.46467
ZBTB21	2.97605	3.99075	2.87403	4.07127	4.2762	3.40214	2.66982	2.68428	2.60436	3.73735	3.17332	2.06084	3.37484	2.13498	3.48828
INTS6	2.16848	2.43392	3.24531	2.5765	2.81908	2.35055	1.76384	2.24346	2.67134	2.51455	2.02343	2.1399	2.2549	1.94186	2.33628
L2HGDH	2.93896	2.47004	4.08029	3.68833	3.20549	2.38756	1.8707	2.16871	2.46989	3.21238	2.6605	2.15355	1.94965	1.70159	2.20802
ANGPTL3	0.0415234	0.302407	1.39731	1.07724	0.213503	0.0710762	0.092884	0.0776532	0.341644	0.0673634	0.281906	0.0271541	0.0381552	0.289834	0.422771
VAMP4	3.69105	5.02115	4.21653	4.88983	3.76368	3.93043	3.88439	4.19399	3.23701	3.82853	3.61105	3.70976	3.89617	3.53274	3.71919
HDAC8	1.24422	1.51627	1.37757	1.34415	0.970412	0.790272	0.771209	0.635987	0.907044	0.816067	0.858856	0.465609	1.13442	1.32008	1.62639
PAFAH1B1	5.45706	5.47759	4.67391	5.64222	4.95006	4.51265	3.86188	5.19031	4.49432	4.77868	4.54235	4.08925	4.81	4.58044	4.46226
PPFIA1	3.37667	3.73497	4.70519	4.09326	4.24871	3.6128	2.67057	3.21125	2.9592	3.79427	3.85613	3.37025	4.21756	3.44465	3.32366
MAN2A1	3.94423	5.14447	4.34017	5.53682	4.80642	4.13886	4.33666	3.1836	3.29281	4.77433	2.97427	3.16504	3.6028	2.81476	5.34861
P4HA1	8.32189	9.03368	8.34827	10.0046	8.44554	7.91858	6.90389	7.32134	7.1507	7.25739	6.43325	5.32871	8.22235	6.47516	8.08297
SEC61B	8.72804	8.28304	7.79293	8.00827	8.34209	8.31394	7.28604	7.57325	7.64101	8.54199	7.87607	7.78007	7.52328	7.56624	7.18177
ABCB7	4.23115	4.47739	3.80711	4.35231	4.27394	4.17168	3.42944	4.09648	4.02009	4.03444	3.687	3.36748	3.97372	3.71196	4.17362
ZNF682	2.35781	2.14421	2.04845	2.58765	2.19305	1.28712	1.6988	1.5433	1.12009	1.87232	0.418784	1.80348	0.710349	1.92292	2.71422
EXOC5	4.9606	4.37213	4.48638	4.95394	4.17698	4.28491	3.82046	3.93526	4.3199	4.7781	3.94159	3.50209	4.13864	3.58478	4.36486
SLC38A1	4.26894	5.57146	4.30274	6.26902	4.3613	4.36835	4.01621	2.53695	3.12261	3.3863	3.37327	1.37501	0.878451	3.79301	5.28605
THAP1	2.63285	4.19904	3.27876	3.68493	3.84029	3.4409	2.38973	3.10839	3.25479	2.71488	2.57621	3.25391	3.20966	2.50861	2.74231
TRAPPC13	4.05629	3.32543	3.49978	3.09887	2.60336	2.79882	2.36608	2.1737	2.50972	3.37601	2.86031	2.81928	2.39871	2.78962	3.08641
SLC2A1	7.80103	7.2481	8.7105	9.50552	7.90667	4.31409	7.43473	5.58854	6.12653	3.55437	5.10115	2.95509	4.16517	4.0203	6.79564
LIN54	4.19684	3.70193	3.97871	3.84323	3.20852	3.36043	3.1011	3.44255	2.73855	3.95254	2.83208	2.96109	3.22214	3.05698	4.13278
LYRM7	4.06453	4.71639	4.70633	4.49119	4.52212	4.71901	3.86608	3.30087	3.83984	4.25884	3.62867	3.31865	4.60382	4.32017	3.74195
TAF1D	3.78864	5.53625	5.4324	4.21685	5.56536	4.42176	3.18522	2.71378	4.11965	4.2716	2.78766	3.06191	2.99197	3.93751	3.91455
SAV1	5.27447	5.37731	4.44272	4.71752	4.65402	4.38169	3.49886	3.08495	4.29121	4.59491	3.76982	3.49872	4.75826	4.41497	4.04388
MTRF1	2.92941	3.1394	2.91092	2.50055	3.06178	2.33222	1.52517	2.03238	2.6358	3.15218	2.50531	2.03115	1.97757	2.44491	2.75937
IRAK4	4.28936	4.00539	3.66301	4.72899	3.66522	3.00103	2.62438	3.11305	3.12118	4.12415	3.31172	3.78054	3.84086	3.45408	4.23087
CCDC59	4.1243	4.53511	4.83662	4.67293	4.94635	4.42344	2.78866	3.71565	3.50255	4.39239	2.80659	3.56349	3.57688	4.20788	4.42929
NUP37	3.50316	3.77707	3.43252	4.21596	4.21929	3.25129	2.63592	3.47529	2.73377	3.58765	2.66421	3.35923	3.13609	3.20151	4.0981
DCTN2	5.4942	4.72226	7.62269	5.03545	4.47174	4.37525	3.93852	5.0145	4.17149	4.64283	4.69676	4.49204	4.6059	4.97126	4.98514
POLR3G	1.93195	1.67464	1.86884	2.17546	3.50546	1.65947	1.18941	1.56643	1.5538	2.2158	2.10705	1.74054	0.742524	1.48944	1.6796
SMIM15	5.76982	5.70404	5.59123	5.37609	5.35433	4.86324	4.31678	4.71398	4.96618	5.1876	5.02726	4.56848	5.45899	4.71221	5.95431
NAMPT	5.17097	5.32883	5.3305	5.48956	5.23315	5.52579	2.56657	3.95011	3.77965	4.6949	3.84795	3.68624	4.89741	4.21947	3.91248
ZNF431	2.76861	2.43317	2.74304	3.64455	2.38858	2.29971	2.13093	2.22284	2.2016	2.26427	2.1332	2.15436	2.39892	2.20016	3.285
CSNK1A1	5.21189	5.48816	5.58675	5.36113	5.44394	5.3401	4.41168	4.1545	4.42583	5.44273	4.4389	4.15738	5.16353	4.36743	5.2056
RBM3	7.53322	6.76866	7.10208	6.38805	7.51375	5.23045	5.07718	6.73319	5.59641	6.71885	5.86911	6.5136	7.11937	6.66705	6.28838
LYSMD3	4.54058	5.03102	4.69172	4.0449	4.36013	4.27474	3.66756	3.4403	3.57124	4.5964	3.43136	3.60858	4.26783	3.96551	4.16061
RGS2	5.62132	7.55119	6.26165	8.44982	6.58608	2.73769	3.7166	2.70201	5.88807	5.88873	5.37682	4.47928	5.58245	2.9318	5.21313
ABCA13	0.423202	1.87657	1.63566	2.30955	1.56755	0	0.279531	1.91069	0.130272	0.286526	0.425674	0.236462	1.13277	0.0900404	0.0843364
TEFM	2.91905	3.13793	2.33337	3.35129	3.55916	2.58422	2.46684	2.77777	2.29613	3.26349	1.56306	2.44998	2.58241	2.40193	2.887
TTC17	4.67296	4.70558	4.09211	4.35299	4.30249	4.29067	3.58064	3.65714	3.84644	4.67135	3.89566	3.25656	4.20355	4.1071	4.0803
NPM1	6.98687	8.29426	7.75331	7.25328	8.51211	8.14555	6.18647	6.89942	7.10514	7.09398	6.70684	6.17272	6.72757	7.32079	7.46228
EIF1	8.85753	10.3723	8.98052	9.4999	9.10658	9.76672	8.32088	8.28437	7.96939	8.15223	8.19292	8.65817	8.12985	8.42725	8.27232

## Sheet: Table 3C
gene_name	TARGET.40.PARDAX.Progressed	TARGET.40.PAKXLD.Progressed	TARGET.40.PAPWWC.Progressed	TARGET.40.0A4I4O.Progressed	TARGET.40.PAPKWD.Progressed	TARGET.40.PALZGU.Progressed	TARGET.40.PANPUM.Progressed	TARGET.40.PARKAF.Progressed	TARGET.40.PATEEM.Progressed	TARGET.40.PASEBY.Progressed	TARGET.40.PATMXR.Progressed	TARGET.40.PAMEKS.Progressed	TARGET.40.PAUVUL.Progressed	TARGET.40.PANMIG.Progressed	TARGET.40.PAUXPZ.Progressed	TARGET.40.PATMPU.Progressed	TARGET.40.0A4I65.Progressed	TARGET.40.PANZHX.Progressed	TARGET.40.PAKZZK.Progressed	TARGET.40.PAMYYJ.Progressed	TARGET.40.PATKSS.Progressed	TARGET.40.PANXSC.Progressed	TARGET.40.PARFTG.Progressed	TARGET.40.PASSLM.Progressed	TARGET.40.PAUTWB.Progressed	TARGET.40.PALFYN.Progressed	TARGET.40.PAKFVX.Progressed	TARGET.40.PAMRHD.Progressed	TARGET.40.PARJXU.Progressed	TARGET.40.0A4I42.Progressed	TARGET.40.PASRNE.Progressed	TARGET.40.PAMLKS.Progressed	TARGET.40.PAMJXS.Progressed	TARGET.40.PAUTYB.Progressed	TARGET.40.0A4I6O.Progressed	TARGET.40.0A4HY5.Progressed	TARGET.40.PALECC.Progressed	TARGET.40.0A4HX8.NoProgression	TARGET.40.PAUYTT.NoProgression	TARGET.40.PAMTCM.NoProgression	TARGET.40.0A4HXS.NoProgression	TARGET.40.PAUUML.NoProgression	TARGET.40.PASEFS.NoProgression	TARGET.40.PANGRW.NoProgression	TARGET.40.PAVDTY.NoProgression	TARGET.40.0A4I0W.NoProgression	TARGET.40.PAVALD.NoProgression	TARGET.40.PAVCLP.NoProgression	TARGET.40.PALHRL.NoProgression
exosome component 8	4.47362	3.63408	4.7779	4.72456	4.08346	5.55831	4.25076	5.15182	4.37717	3.64016	4.58359	4.22434	4.86446	3.21604	2.82287	5.11912	3.51778	4.49722	3.9994	3.388	3.81248	4.08638	4.03389	5.16991	4.03754	3.53618	3.56388	4.54782	3.78077	4.31809	5.01235	4.44935	4.65644	3.72547	3.46057	4.45927	4.03603	4.21969	3.77167	5.29688	3.50838	3.90821	4.21343	3.7242	2.89431	2.78595	3.84241	4.0084	4.73479
ubiquinol-cytochrome c reductase binding protein	4.56138	4.58833	4.12205	5.05621	3.87078	5.77835	5.68123	4.85757	4.82675	4.3147	5.49983	4.88515	5.45787	3.99313	4.14666	4.93661	3.48751	5.11214	5.12677	4.84517	4.2622	5.18983	4.92166	4.70049	5.45767	4.63058	5.61235	5.22436	4.40003	4.76831	4.36302	7.75548	4.94989	4.85252	4.42215	3.88118	4.95158	3.635	3.52594	4.73811	3.47588	4.34409	5.80429	4.7593	4.0098	3.42738	4.89547	4.37283	5.4445
matrix metallopeptidase 27	0.996099	0	0	0.0738202	0	0.535655	0	0	0.0356239	0.631803	0.0633649	0	0.0578315	0.0909889	0.148088	0.225645	0.179511	0	0.0607392	0.0453032	0	0.15082	0.802565	0.347212	0.0817487	0	0.0391384	0.954345	0	1.61575	0.236829	0	0.103263	0.849679	0	0	2.21447	0.0932897	0	0	0	0	0	0	1.16537	0.0999011	0	0	0
beta-1,3-N-acetylgalactosaminyltransferase 1 (globoside blood group)	5.20481	4.25242	4.14967	3.74731	3.5581	4.22824	4.87659	2.9881	4.17024	4.02681	4.57036	5.18647	3.96162	3.75219	3.27916	4.13885	4.68637	4.07651	3.19736	3.24711	4.88664	3.13401	4.37321	4.34268	3.89641	2.93896	3.82152	3.52023	4.46591	3.20919	4.71747	3.38221	3.88809	4.19474	3.15196	4.46962	3.48798	4.97067	3.70137	3.73522	5.33644	3.76033	4.28459	2.98266	1.70651	2.2302	4.15243	4.21233	2.51543
homeobox A5	6.06977	3.84391	3.80086	4.90341	5.25475	4.84834	5.37575	5.27585	4.26461	3.39642	4.36642	4.12929	4.62404	3.91657	3.87593	6.03393	3.13248	3.19728	5.21362	4.65083	4.27266	4.09007	4.20042	4.32129	3.76413	3.57663	5.07857	4.97005	3.95911	3.71812	4.02754	5.12013	4.17958	4.3775	4.55816	3.33894	2.61023	4.94771	1.98808	3.59591	2.65503	4.47733	3.11778	3.28045	1.23609	3.14429	4.30874	3.55721	3.75821
cortistatin	4.70734	2.48995	3.79701	2.34945	4.28339	4.92792	2.90945	1.68374	4.67239	1.75215	6.15719	1.06578	2.37637	2.63543	1.22138	4.60667	2.02155	1.18212	5.1606	6.20115	2.41749	4.31687	4.39131	2.88086	1.13508	0	4.42206	3.49379	1.88163	4.08824	1.43771	4.60404	3.21757	4.76968	0.848798	0.575603	3.41752	2.56903	0.112233	2.49149	0.95002	2.06843	1.92144	2.9115	0.678252	0.527271	0.837459	2.10802	3.82557
ribonuclease P/MRP 30kDa subunit	4.75256	3.79663	5.16446	4.06178	4.1675	5.54974	5.11699	4.24366	5.48961	3.65235	4.20884	4.41663	5.0491	3.1168	3.3351	4.69412	3.77801	4.22851	3.3813	4.99715	4.66293	3.91095	4.69413	4.48809	3.5656	3.95366	4.75922	3.53833	3.43471	3.85034	4.0338	4.98794	4.09495	3.46909	3.86303	4.05838	3.46182	4.43577	2.84683	4.01424	3.44493	2.91079	4.26067	3.51976	3.54591	3.64752	3.9418	3.91974	3.64971
WD repeat domain 72	6.64712	0.0768327	4.7252	2.21869	2.63564	4.13661	0.0831112	0.731618	2.84513	1.48738	3.33387	0.0332292	3.48998	0.0204844	1.47851	4.85438	2.2408	0.0451634	2.48313	3.0158	0.383165	0.651591	4.50121	1.86053	1.07697	0	3.76404	5.0377	0.156397	3.31988	1.70106	2.47075	2.67992	4.97111	0.0405418	0.0590783	1.31493	2.323	0.186501	0	0.365245	0.422879	0.129481	0.0071955	1.81221	0.170438	0.0299829	0.107688	1.24367
carbonic anhydrase XIII	1.62157	1.06295	2.13665	2.51987	0.95442	1.84487	2.07169	2.23931	3.17687	1.91181	1.31557	0.747173	4.23685	0.736215	1.20464	2.33001	1.30211	1.90889	2.77623	1.1432	2.5213	1.47171	2.45136	3.03311	1.52376	1.64552	1.31284	1.93689	1.13645	0.954643	2.01074	0.409907	2.27971	1.29143	2.89776	2.64805	2.86324	2.57202	0.508834	1.94935	1.62518	1.19327	2.5101	1.25399	0.598937	0.612022	0.194844	1.87338	1.04061
regulator of microtubule dynamics 2	2.67317	1.98357	4.6926	1.96639	1.75035	2.66195	2.64904	3.11193	3.18118	2.65512	2.81924	1.89429	1.28445	1.4393	2.16395	2.1491	1.32464	1.55321	2.86237	2.54701	1.91945	1.42234	3.64137	1.75979	1.9771	1.09896	1.72687	1.95531	2.02336	2.1504	2.16282	1.93225	2.81734	2.17999	1.42541	1.27894	2.56643	1.83819	0.903578	2.47628	2.39643	1.84073	0.857344	1.2492	1.03288	1.21107	1.52527	2.09761	1.85212
mitogen-activated protein kinase kinase kinase 15	1.36233	1.123	0.356144	1.32349	0.190678	0.125387	0.580145	0.284159	0.480369	0.199123	0.2587	0.3639	0.303109	0.398241	1.9271	0.0992279	0.316609	0.243303	0.248656	0.809003	2.54666	0.103263	0.0590783	0.631803	0.350158	0.263515	0.0524159	0.171591	0.160146	1.04663	0.566084	0.748032	0.419323	0.67075	0.10165	0.825297	0.248049	0.855352	0.0746424	0.759838	0.0855606	0.703721	0.794104	0.270708	0.167486	0.225028	0.569491	0.441058	0.250477
pyruvate dehydrogenase kinase, isozyme 1	2.30021	2.28848	2.11137	5.31012	3.49311	1.93512	1.9361	3.77144	2.67509	1.18764	4.47821	3.56205	3.05932	1.94557	1.09835	5.24039	2.25471	1.65796	1.7592	3.1067	5.22406	1.72587	2.4775	4.37685	1.33188	1.61188	2.51263	2.67536	3.30168	4.7358	3.444	3.51099	2.21968	2.29699	3.57072	3.50358	2.63501	2.45441	2.29163	3.38745	3.464	4.69773	2.64466	1.66407	0.944034	1.87747	3.31227	1.96669	2.61958
MAP/microtubule affinity-regulating kinase 3	4.52681	4.82061	4.51389	4.1864	3.37263	4.79225	4.51883	4.48588	4.78249	3.76683	4.7115	4.33208	3.61615	3.74814	3.3305	5.76518	3.64768	4.14637	3.93043	5.11994	4.38826	4.08926	3.39679	4.92082	4.13263	3.22796	4.28667	4.27317	4.41355	7.2114	3.95751	3.88892	4.32005	3.65835	4.44914	3.78968	4.09206	4.17702	3.25089	4.40091	3.38829	4.37716	4.05942	3.36234	3.86422	3.07017	4.30378	3.94733	3.57932
collagen, type XXIV, alpha 1	6.94355	5.91358	4.25031	3.22517	5.71887	4.11132	5.44968	5.59469	4.88266	5.09258	7.54137	0.843019	3.97174	4.15581	5.77305	7.20163	3.942	2.70483	2.88552	5.39542	6.4813	3.37376	5.92088	4.752	3.16065	2.58029	4.61618	5.5659	3.59659	5.71602	5.16171	2.95433	4.38793	5.52841	2.78304	2.96183	3.63236	4.01213	3.26359	2.7612	4.75216	4.79869	3.2396	4.2907	3.7549	2.45589	4.67864	4.10307	2.96591
claudin 11	3.34589	0.942984	2.33328	1.00238	2.6656	1.37896	0.62068	0.458802	4.75767	4.49619	3.71988	0	4.16491	0.672471	1.10447	4.01243	0.886511	1.30369	1.43221	4.27899	1.73799	1.01507	6.88125	0.191184	1.0268	0.516822	1.22497	3.46498	0.423094	4.08031	2.37376	2.0285	3.83222	3.31623	0.202386	0.56267	5.75548	0.195348	0.14104	0.0528332	0.558855	0.0635029	0.890252	0.938625	0	0.402176	0.584385	1.57604	0.134615
small nuclear RNA activating complex, polypeptide 3, 50kDa	3.95165	4.41114	4.17202	4.41363	4.696	4.86507	4.98568	6.05868	3.91125	3.74919	6.23812	4.90277	3.9417	3.48547	3.09204	6.47527	4.25239	3.43436	3.87022	4.02666	5.85388	3.48138	5.10523	4.88252	3.75466	3.11879	3.95118	4.26532	3.09815	4.79155	5.28074	4.12078	4.73624	3.4493	4.45815	5.26039	3.2991	4.48322	2.39512	3.70251	4.86221	4.82052	4.54923	2.91539	3.79776	3.94234	3.12004	3.60198	2.76579
isoleucyl-tRNA synthetase 2, mitochondrial	5.79877	6.85509	6.75691	6.22668	7.38018	6.83565	6.46855	6.39897	6.17807	6.5625	6.19682	6.12871	7.28089	4.98513	5.10475	6.96536	5.86506	6.31824	5.59862	5.58399	6.81422	5.74493	6.28978	6.52423	6.63123	5.0778	5.65978	6.03584	5.54282	6.58813	6.62617	6.43519	6.45929	5.33529	6.74107	7.03417	6.65183	5.20909	5.30481	6.33408	6.86079	5.93446	7.16865	5.49559	5.55885	4.49529	6.62296	6.03839	4.63901
zinc finger, DHHC-type containing 21	2.68433	1.55988	2.89656	1.54117	2.91322	2.32935	2.85162	4.62761	2.72886	2.65887	3.89642	2.84286	2.63427	1.77442	1.57928	4.31601	2.14942	2.22144	2.36457	2.543	2.41273	1.59779	1.77791	3.14057	2.79987	1.33743	2.31771	2.22826	1.39001	2.56657	3.24403	1.63654	2.87013	2.56711	2.00558	3.69634	2.0291	3.04843	0.596554	1.68746	1.99794	2.86859	2.11163	1.42889	0.839153	2.3932	0.812868	1.96695	1.09545
integrator complex subunit 6	3.6387	2.62642	2.40795	2.16848	2.23383	3.39054	3.10986	3.52612	2.25574	2.25417	2.72469	2.46281	2.38847	1.99946	2.2357	3.64337	2.24346	2.3507	2.26508	1.96377	2.4971	2.46137	2.54804	3.01844	2.29798	2.10625	1.59302	3.52077	1.67509	3.24531	3.08614	2.11843	1.45623	2.27128	2.5765	2.81908	2.43202	0.636822	1.65865	3.20331	2.35055	2.98839	1.87507	1.80095	2.7941	1.76384	2.23076	2.17773	1.84012
angiopoietin-like 3	0.635522	1.12592	0.461738	0.0415234	0.552967	1.69019	1.27584	0.31034	0.384823	0.418352	0.764856	0.500802	0.268554	0.100978	0.202136	0.359071	0.0776532	0.191184	1.21157	0.299714	0.265197	1.05922	0.142087	0.203389	0	1.63152	0.280125	0.605874	0.789103	1.39731	0.843421	0.36614	0.194844	0	1.07724	0.213503	0.73266	0.0526941	0.031254	0.0673634	0.0710762	0.365916	0.420294	0.54092	0	0.092884	0	0	0.932742
transcription elongation factor A (SII), 3	7.10159	4.46299	5.44641	5.90516	8.04046	6.85277	6.43691	6.13283	4.71647	5.49677	6.29535	4.09112	7.1343	5.95557	5.40977	6.84021	5.80433	4.73459	5.48774	5.14856	7.2463	5.11245	6.53427	6.32385	5.27079	4.45416	7.53442	4.71034	7.30511	6.06106	5.03099	6.59691	6.58184	5.93301	4.44224	7.11522	4.99874	5.42038	5.20886	7.16041	6.56814	7.22614	4.94559	5.7064	4.53644	3.89012	6.56828	5.66933	5.86679
zinc finger protein 664	7.89411	6.21024	6.38579	7.1407	6.32584	6.78179	6.04229	6.76024	7.05885	5.93075	7.02806	6.09321	6.0374	5.5952	4.30732	7.87373	6.65228	6.06994	5.8128	6.55493	6.20129	6.0087	5.85156	7.67035	5.94533	5.01734	5.28033	6.04607	6.48272	6.80261	7.06404	5.86258	6.22158	5.99188	6.46258	6.22315	5.83157	6.43423	5.33655	7.17543	6.25461	6.86982	6.86655	5.39693	4.20789	4.36	5.53365	5.12861	5.01405
prolyl 4-hydroxylase, alpha polypeptide I	9.4035	8.24034	6.30577	8.32189	7.8662	7.93425	8.22401	8.6019	7.04237	6.08379	9.36641	8.02049	7.95032	7.73321	8.00483	10.1961	7.32134	7.04365	7.03505	9.22006	9.205	6.92644	7.55481	8.74964	6.40568	6.62818	7.79791	7.74646	8.60118	8.34827	8.44477	7.36344	8.91091	7.19552	10.0046	8.44554	6.74154	6.13291	6.88241	8.38342	7.91858	8.03429	5.82741	7.44727	6.84059	6.90389	8.04699	7.46642	6.21872
transmembrane protein 44	5.30323	3.12285	4.54556	4.30697	3.00707	4.77175	5.54137	3.63688	4.14824	3.63917	5.43087	4.16303	2.90414	3.60379	4.79459	4.82228	3.77045	3.85891	4.56931	4.18027	4.02156	4.09939	4.66891	3.76556	4.50585	3.24007	3.87115	4.50476	3.1869	3.98315	4.32417	3.94252	3.8466	4.49888	2.26799	4.16496	4.59682	4.55929	2.99512	4.69548	3.24175	4.05106	2.65709	3.32494	2.52389	3.85784	4.17402	4.60982	4.15524
neuropeptide Y receptor Y2	1.3255	3.59368	5.44208	2.23281	0	0	0.287472	0.355355	0.125122	2.47384	2.48625	0.471344	0	0	0	2.33794	2.23502	1.8482	0.180912	0	0.460271	3.65242	0	3.64405	0.860208	0	0.0993625	0.133827	0	0.19232	2.0719	0	0.508936	0.946357	0	0	0	0	2.4031	0	0.277033	0	0.493032	0.190552	0.10541	0.119821	0.16877	0	0.121015
dual specificity phosphatase 5	4.79302	3.4086	5.65881	5.26702	4.76333	5.07366	4.18226	5.33948	5.19564	5.80688	5.90955	4.48322	4.0868	3.75828	4.73812	5.00293	4.65255	4.92569	5.1166	3.91639	3.21346	4.17606	4.86011	4.68731	5.89032	4.6863	5.32931	6.74881	7.14331	5.77028	5.37777	2.40887	4.12741	5.26119	4.36271	4.36856	5.67827	3.77089	4.5235	3.56605	3.54236	2.38488	4.96389	4.59913	5.10362	4.16459	2.79876	4.41832	3.19676
early B-cell factor 1	4.46888	3.16946	5.87296	4.56199	5.66829	6.29865	6.1262	5.87538	5.62858	5.80999	6.393	4.80482	5.85305	4.02078	3.73168	6.56605	3.52006	3.75816	4.45867	4.21078	3.11202	4.75913	6.09022	6.27908	5.56708	4.6447	5.17823	6.27442	4.18625	6.35522	4.24828	4.601	5.087	4.75975	3.96025	3.19845	4.61459	4.69839	4.79656	3.48051	4.11944	4.67737	4.6581	4.14617	3.98113	4.91344	2.96615	4.00735	4.01033
MAM domain containing 2	6.66413	1.6876	6.52361	5.57332	6.89127	5.76987	5.04001	7.62849	6.75078	5.46882	7.84136	3.78743	6.00509	4.4259	5.93607	7.04185	5.36382	5.30931	6.15208	7.59107	5.40246	3.92721	6.4219	6.01464	5.9376	4.37582	5.80054	5.81648	4.3931	7.05137	7.16429	1.36042	6.21759	5.38537	3.60028	2.52847	4.11059	5.49677	4.99323	1.9358	5.01462	4.68842	3.99694	4.80483	6.00471	4.08795	3.51364	5.83501	1.51329
WNT inhibitory factor 1	8.49858	4.42463	9.7602	3.93631	7.22936	5.03154	3.83794	4.71915	5.26375	3.65488	10.3641	0	1.82619	0.902884	4.94029	6.25391	2.70408	4.89989	4.25597	0.844466	3.49566	4.22995	8.45025	1.53077	2.99164	0.122076	5.69675	6.2013	1.11417	4.83666	1.92843	0.32964	1.86525	2.2011	0.471031	3.37857	1.2765	2.58357	0.0978804	0.738638	4.10856	4.13981	4.44931	3.65804	0.176578	0.200253	0.675726	0.609282	3.00366
TATA box binding protein (TBP)-associated factor, RNA polymerase I, D, 41kDa	4.90742	6.76581	4.12731	3.78864	4.93822	5.09151	4.7827	5.18677	4.77596	3.75574	5.01142	5.21861	3.71003	3.42218	3.45149	4.87222	2.71378	3.51772	4.29131	3.24613	4.60408	3.50717	4.99105	4.56263	3.98711	3.1415	4.17061	4.81352	4.00048	5.4324	4.82972	4.6313	4.08246	4.62529	4.21685	5.56536	3.58728	3.14968	1.83992	4.75524	4.42176	4.97964	5.02466	3.02498	3.40167	3.18522	4.99999	4.42842	3.50673
polymerase (RNA) III (DNA directed) polypeptide G (32kD)	2.60044	2.6559	1.1133	1.93195	2.0234	1.7066	1.21226	1.66043	1.88331	1.70244	3.0963	2.61252	1.3463	1.55743	0.931607	1.79327	1.56643	1.6016	1.64367	0.942909	1.99538	1.63552	1.71554	1.96047	2.03478	1.04544	1.21462	1.78584	0.722903	1.86884	2.22885	4.04088	1.40245	2.4599	2.17546	3.50546	2.0358	1.87861	0.616358	2.82397	1.65947	3.11145	2.4417	1.40665	0.529171	1.18941	1.1271	1.66198	0.879863
RNA binding motif (RNP1, RRM) protein 3	7.50535	6.95008	7.62122	7.53322	7.22975	6.98606	6.52358	7.5061	8.09531	6.50749	7.38118	6.23704	6.69484	5.67034	4.65512	6.61371	6.73319	6.879	6.07582	6.10627	6.00777	6.47959	8.20562	7.62826	6.81448	6.32658	6.981	6.2855	7.12616	7.10208	6.51612	6.99771	6.38858	6.87951	6.38805	7.51375	7.22751	6.37644	7.69053	6.34593	5.23045	6.15205	6.69032	5.99754	6.85426	5.07718	5.54018	5.86119	5.98292
EF-hand calcium binding domain 2	1.42449	1.00569	1.24483	1.58101	2.12575	2.18517	2.53172	1.29678	2.233	1.43339	0.825948	1.84828	2.25017	2.08052	1.14652	1.8484	1.17409	1.08257	1.02871	0.88096	1.54775	1.34352	1.03872	1.54072	1.33594	1.22706	2.046	1.39039	0.719227	1.54107	1.96481	1.12539	2.30422	1.64381	0.422448	1.30346	1.49262	2.10564	0.270469	1.771	1.05561	1.07594	1.07471	1.06943	0.639417	0.732226	0.449535	1.49472	0.722991
ZW10 interacting kinetochore protein	7.16731	5.49481	6.08876	6.11671	6.20335	7.19542	6.61744	4.87438	6.82772	5.10594	7.04365	5.55177	7.1358	5.20071	4.4107	6.67043	5.73952	5.83449	5.68431	6.6094	6.34924	5.93349	5.65079	6.68939	4.76657	4.62812	4.63563	5.02141	6.39476	5.78774	5.41072	5.99062	6.39836	5.27936	4.9737	6.12069	4.88418	5.75816	5.08408	6.88222	4.677	5.06292	5.21922	5.26826	4.82531	3.79639	5.83812	5.77402	7.22361
ectonucleoside triphosphate diphosphohydrolase 3	4.94755	1.43296	5.2247	0.286645	4.16434	2.46986	3.48588	4.71508	5.48592	4.45474	6.73914	2.13741	5.60204	2.61138	0.620493	6.064	5.3068	2.68325	2.8405	8.52135	2.30824	0.639232	6.36975	3.82574	3.15334	1.06357	6.57195	5.57004	3.32014	5.41347	5.44911	0.477366	5.38635	4.79152	2.93474	1.36429	4.59741	1.32314	1.52452	0.924404	2.72881	1.30188	0.676628	2.77728	1.38206	1.32158	2.85158	3.1343	0.0419438
SMAD family member 9	5.17515	3.22024	3.07726	4.39666	4.08619	5.64346	4.81841	5.15643	4.58963	2.89377	5.25003	2.97926	4.66565	2.11437	4.01288	6.41741	4.31316	2.98836	4.50407	3.10846	4.46022	3.67183	3.34961	4.39825	2.8967	1.30323	3.83466	4.04257	1.82859	5.70544	4.75023	4.00361	4.68041	2.6086	2.52817	3.98968	3.06343	4.23765	5.06579	4.09955	4.04096	4.5922	3.43817	2.45101	2.67442	1.57609	4.48977	2.95769	2.8431
akirin 1	8.04363	7.76949	6.44698	7.03316	7.24896	7.07478	7.35324	7.18217	7.27881	6.60724	8.14476	5.8807	7.53231	5.85008	5.93427	8.18128	6.59002	6.35089	6.74241	6.72447	7.71508	5.51083	7.60252	7.25538	6.83753	4.99487	7.23203	7.62803	7.51363	7.88775	7.71386	6.80904	6.62106	6.09939	6.51683	6.70496	5.82459	7.00152	5.06354	6.18903	7.06357	7.02438	7.99724	5.50156	5.88802	5.3419	7.41375	6.55847	5.20656
F-box protein 28	4.58537	5.25386	4.31359	4.56085	5.11987	5.0868	4.9386	4.553	4.69193	4.50334	4.68423	4.87376	3.95535	3.73001	3.68312	5.3708	4.69046	4.40125	4.25655	3.97529	5.73737	4.1293	4.38855	5.49896	4.66944	3.1861	3.80239	4.65736	4.13119	5.1387	5.40167	4.03582	4.87669	3.85777	4.49601	5.2901	4.31187	4.29608	2.26195	4.14081	5.35247	4.37988	4.12537	3.92464	3.28861	3.74661	4.75179	4.16056	3.06545
BBSome interacting protein 1	2.52614	1.72478	2.17383	3.02963	2.72157	2.60075	2.35109	2.05735	3.3427	1.84354	3.40231	2.6287	2.16832	2.03214	2.82613	3.33665	1.63148	2.16986	2.15966	2.19799	2.27953	2.33862	3.38033	2.16427	2.02949	1.48959	2.80281	1.65049	2.01528	2.00648	1.96625	1.96687	2.1635	1.46566	1.9128	2.11906	2.40193	2.29355	1.54097	2.09119	1.60312	1.32118	3.28593	2.34099	1.45333	1.40926	2.01268	1.36882	1.74541
[truncated: 33 more columns]

## Sheet: Table 3D
gene_name	TARGET.40.0A4I4O.Dead	TARGET.40.0A4I0Q.Dead	TARGET.40.0A4I42.Dead	TARGET.40.0A4I6O.Dead	TARGET.40.0A4HY5.Dead	TARGET.40.0A4HXS.Alive	TARGET.40.0A4I0W.Alive	TARGET.40.0A4I65.Alive	TARGET.40.0A4HMC.Alive	TARGET.40.0A4I5B.Alive	TARGET.40.0A4I48.Alive	TARGET.40.0A4I4M.Alive	TARGET.40.0A4I9K.Alive	TARGET.40.0A4I8U.Alive	TARGET.40.0A4I3S.Alive
DCUN1D5	2.87878	3.42512	3.48566	3.72576	4.21592	3.80081	2.27605	2.60165	2.71176	2.81637	2.67154	2.45749	3.44074	2.21001	2.70184
RORA	3.99653	4.15835	1.95684	4.53488	2.62529	2.5143	2.37515	1.62349	1.05242	1.65732	1.03949	1.47368	1.48985	1.52155	2.94163
ZNF280D	3.00207	2.89801	2.40379	2.67938	2.26394	2.18615	1.78149	1.61725	1.97335	2.74181	1.58482	1.93972	1.84856	2.03643	2.84583
LYRM7	4.06453	4.71639	4.70633	4.49119	4.52212	4.71901	3.86608	3.30087	3.83984	4.25884	3.62867	3.31865	4.60382	4.32017	3.74195
SNX2	4.37416	5.20891	5.26625	5.26519	4.85763	4.67214	4.07593	4.28192	4.19112	5.13378	4.25524	4.481	4.53406	4.1253	5.25915
INPP1	4.86719	4.92297	5.67766	4.13418	4.71633	3.93908	2.44911	3.82173	3.28004	5.08543	4.2558	4.12554	4.62543	3.33043	4.80207
RGS2	5.62132	7.55119	6.26165	8.44982	6.58608	2.73769	3.7166	2.70201	5.88807	5.88873	5.37682	4.47928	5.58245	2.9318	5.21313
THAP1	2.63285	4.19904	3.27876	3.68493	3.84029	3.4409	2.38973	3.10839	3.25479	2.71488	2.57621	3.25391	3.20966	2.50861	2.74231
MFSD8	2.84611	2.64759	3.06406	3.40554	2.61944	2.72286	2.43845	2.30258	2.02155	2.9942	2.43018	2.35862	2.64962	1.93195	3.0915
ZNF292	3.28266	4.00344	4.09995	3.60283	3.85045	3.42996	3.19044	3.02271	3.59363	3.51607	2.9182	1.83968	3.72638	2.55802	3.56826
TMEM161B	2.2809	2.65249	3.29635	2.03924	2.79273	1.63371	1.55915	1.61626	1.80785	2.74818	1.88084	1.68881	1.7327	1.90866	2.46467
SYDE2	2.42043	2.6565	3.93151	2.18774	3.05384	2.07659	1.23707	2.33531	2.07673	2.78434	2.69214	2.31412	2.15953	1.86703	1.86104
SPTLC1	5.54303	5.7194	4.71452	5.80161	5.75321	5.62413	5.18901	4.37536	4.73632	5.40414	4.53	4.84219	5.15833	4.22202	5.01505
CREBZF	5.12808	5.11897	5.81667	4.6001	4.68391	4.92938	3.45357	3.84995	4.55415	5.41825	4.15913	4.13978	4.06925	4.42342	4.45593
SPTSSA	6.90192	6.54994	5.29347	7.02992	6.86018	6.67032	5.10981	4.93798	5.72082	6.25191	5.9698	4.83767	6.48965	5.43937	5.98962
POLK	3.05008	3.25372	2.98719	2.34053	2.87947	3.12082	2.10507	2.08263	1.90804	2.84376	2.55812	1.9133	2.55063	2.24266	2.7459
GPATCH2L	3.85992	3.5836	3.10474	3.75219	3.01732	2.89422	2.63578	2.83764	2.90789	3.28761	2.92416	2.53859	3.47484	2.01243	3.25134
NAPG	5.21348	4.8245	4.97059	4.98747	5.1514	4.54385	2.32441	4.12958	3.4636	5.55159	3.91976	4.33618	4.94509	3.89712	3.71889
ANKRD49	3.25936	3.68621	4.00583	3.66644	3.84768	3.66189	2.66159	3.41724	2.93572	3.54226	2.57408	3.00981	2.92708	3.10663	3.27804
VDAC1	7.45025	7.98433	8.3904	8.07964	8.33965	8.06218	6.72397	7.37734	7.25126	7.49558	7.09488	6.99523	7.384	7.21442	7.19416
RAB30	2.72336	3.84939	3.32907	3.36959	2.29305	2.81106	2.37848	2.22076	1.93591	2.96066	2.60945	2.39303	2.59548	2.19698	2.50594
IL22	0.116365	0.290896	0	0.69964	0	0	0	0	0.124857	0.0958569	0	0	0	0	0.0478175
KLHDC1	3.1277	3.21523	3.83454	2.79286	2.1573	1.79356	1.83414	1.35152	1.18282	2.71826	2.06915	1.87468	2.89373	2.4522	1.80884
CCDC59	4.1243	4.53511	4.83662	4.67293	4.94635	4.42344	2.78866	3.71565	3.50255	4.39239	2.80659	3.56349	3.57688	4.20788	4.42929
CCL28	4.97583	3.98093	4.58967	4.0907	4.36267	3.27208	2.9879	3.65171	2.56842	3.41845	4.50505	2.64536	1.2492	3.14799	4.36694
PSMC6	5.7414	5.06497	5.17352	5.26395	4.94554	4.74876	3.80251	4.47468	4.77056	4.83301	4.30889	4.3349	5.64805	4.30611	4.68311
ZNF431	2.76861	2.43317	2.74304	3.64455	2.38858	2.29971	2.13093	2.22284	2.2016	2.26427	2.1332	2.15436	2.39892	2.20016	3.285
C4orf45	0.339365	0.121944	0.549324	0.14991	0.0844725	0	0.164271	0	0	0.283329	0	0.0608775	0	0.146786	0.180403
CCDC122	0.71079	1.057	0.856388	1.82302	1.46158	0.617957	0.300651	0.487178	0.918692	0.471864	0.502229	0.604736	1.37873	0.449112	0.791439
DPP8	4.39712	4.0054	4.22836	4.44306	4.43002	5.09586	3.18807	3.1852	3.12732	4.20573	3.58999	3.4992	3.53297	3.32723	3.64582
STX2	6.30408	5.00814	5.67524	4.92015	5.10892	5.38353	3.76055	5.12201	3.55943	4.77217	4.63668	4.49099	4.508	4.52552	5.57706
ZNF800	3.939	3.61985	4.00595	4.43006	4.02	3.75775	3.09972	3.80445	3.21111	4.01361	3.99367	3.4828	3.90649	3.09134	3.68656
EIF1AX	6.84347	7.14509	8.26838	6.59733	7.21146	6.4608	5.38434	6.65185	5.65341	5.6197	6.04431	5.98837	6.78381	6.61222	6.51429
FAM216A	3.11395	4.52147	3.70502	4.37493	3.98126	2.81161	2.32573	2.83631	2.36129	2.60902	2.90458	2.41075	1.95371	2.92368	3.78237
POLR3G	1.93195	1.67464	1.86884	2.17546	3.50546	1.65947	1.18941	1.56643	1.5538	2.2158	2.10705	1.74054	0.742524	1.48944	1.6796
ZC3HAV1L	6.09582	5.59941	5.21585	5.74417	5.45893	5.27663	4.43822	3.66904	4.24601	4.91693	4.48929	3.93551	5.0886	4.52354	4.60482
AC107021.1	1.15114	1.82522	2.84523	1.00576	1.91701	0.70779	0.289362	1.15853	1.80546	0.925164	0	0.398022	0.640991	0.745108	1.44186
ANKRD12	4.55112	3.65613	3.76408	4.37557	4.05634	3.23593	1.53903	3.11568	3.45988	4.23724	3.13424	2.48277	3.56423	4.0197	3.32152
FAM3C	7.38796	6.8081	6.40326	7.22838	7.60031	6.8577	4.33937	5.93667	5.43374	6.42891	5.16689	5.8223	7.43117	5.35789	6.13573
TRMT10A	2.55452	3.27547	2.2294	3.06397	2.91825	3.05677	2.20683	2.3452	1.90874	2.1731	1.35558	2.02467	2.49884	1.69559	2.73717
RPS4X	9.84742	10.669	10.572	9.12566	9.78748	9.63048	9.39602	9.37182	9.56067	9.29815	9.63449	9.45333	9.17747	10.0588	9.62505
SNX25	4.28571	4.00314	5.32634	4.10091	3.82857	3.58162	2.90635	3.32018	2.67448	4.37382	3.19618	3.87101	3.72258	2.96493	3.75759
C15orf48	1.88378	0.90327	1.2228	1.45465	2.17172	0.646808	0.0923428	0.297954	1.91716	0.502229	0.2806	0.51167	0.0930192	0.865602	0.690194
GTF2H3	5.4439	4.70394	4.6726	5.04239	6.38426	4.92636	3.51096	4.24716	4.60834	4.79698	4.13234	3.96831	4.31293	4.06015	5.36897
AIMP1	4.30227	4.63226	4.19398	4.31438	4.75979	4.30997	3.81893	3.28666	3.51178	4.15701	3.45008	3.71916	3.53502	4.40824	3.86873
LYSMD3	4.54058	5.03102	4.69172	4.0449	4.36013	4.27474	3.66756	3.4403	3.57124	4.5964	3.43136	3.60858	4.26783	3.96551	4.16061
CNIH1	6.92357	6.51993	6.1846	5.94327	6.21047	6.05354	5.99504	6.07156	6.08488	6.18776	5.94545	5.77151	6.40557	5.99991	5.68798
ZNF680	3.63343	2.67706	2.87086	3.55471	3.22222	2.81131	1.01099	2.06922	2.33631	3.13949	2.20486	2.87568	3.147	3.01735	2.46276
DDIT4L	2.94733	6.89443	2.05738	9.86356	6.58423	2.34951	5.28204	2.7461	0.474462	1.8844	1.79834	3.17445	0.311736	3.09422	2.87434
PI15	4.36828	5.2604	2.61113	6.11072	8.7629	4.69825	4.84876	1.40577	1.48481	3.22902	2.50693	1.86798	0.138683	4.89256	1.28214
CCDC82	2.31226	2.68057	3.00448	2.65958	2.6872	2.78425	1.66161	1.93697	1.78864	2.58943	1.64819	2.02475	2.02006	2.02829	2.09096
ZDHHC17	3.59103	4.10719	4.02224	3.88033	3.42032	3.3742	2.569	2.9361	3.11638	3.91256	3.01361	2.99338	3.30375	3.37934	3.44747
PDK1	5.31012	3.61337	4.7358	3.57072	3.50358	3.464	1.87747	2.25471	2.20336	1.97324	2.40395	1.1462	2.85844	1.33994	2.72875
SARNP	1.31806	1.14215	2.65416	0.446362	0.803888	0.325502	0.230326	0.221815	1.18625	0.2529	1.04208	0.204642	0.181675	0.44159	0.903424
EEA1	3.07483	4.92384	3.75486	4.75816	3.89021	4.32965	2.51581	3.12262	2.30507	3.36105	2.66916	2.96606	4.06639	2.90599	3.2576
OSBPL8	4.91649	5.0907	5.45202	5.78223	4.95606	4.96973	4.22409	4.89103	4.56998	5.05019	4.16763	4.10628	4.49668	3.87554	4.88628
