# Supplementary material for: Loss of miR-16-1-3p Activity Predicts Chemoresistance and Progression in Osteosarcoma: An Integrative Clinicopathologic Study
Source: Research Square preprint supplement (doi:10.21203/rs.3.rs-7665473/v1), 2025-11-13
Supplement: Supplementary file 3 [file 76e8d3be7f494c8a1ded923c.xlsx]

## Sheet: Table 2A
	gene_name	Gene.name	Total.context...score	logFC	AveExpr	t	P.Value	adj.P.Val	B
1	FGF2	fibroblast growth factor 2 (basic)	-1.61	0.614956	0.675949	2.53521	0.0242862	0.644682	-3.38798
2	DESI1	desumoylating isopeptidase 1	-1.26	0.376135	4.91865	1.37784	0.190624	0.855028	-5.11708
3	GADD45G	growth arrest and DNA-damage-inducible, gamma	-1.22	1.37553	3.50635	2.00409	0.0655113	0.778064	-4.24871
4	DYNLL2	dynein, light chain, LC8-type 2	-1	0.317137	5.58881	0.833398	0.419096	0.912744	-5.66946
5	FOSL2	FOS-like antigen 2	-0.97	0.773134	7.04712	2.38622	0.0322547	0.684386	-3.63731
6	PURA	purine-rich element binding protein A	-0.87	0.255411	3.52166	0.886826	0.390671	0.90556	-5.62556
7	PHF19	PHD finger protein 19	-0.85	0.368878	4.65368	0.702886	0.494049	0.912744	-5.76627
8	BCL2L2	BCL2-like 2	-0.83	0.769684	4.80648	1.74487	0.103676	0.841496	-4.63237
9	CDCA4	cell division cycle associated 4	-0.83	0.502762	5.43309	1.40343	0.18303	0.850783	-5.08587
10	UBE2Q1	ubiquitin-conjugating enzyme E2Q family member 1	-0.82	0.304655	6.06283	1.52455	0.150412	0.845133	-4.93264
11	SNAP25	synaptosomal-associated protein, 25kDa	-0.82	0.650766	1.57967	0.808238	0.432942	0.912744	-5.68928
12	PTPN3	protein tyrosine phosphatase, non-receptor type 3	-0.81	0.245138	3.19683	0.770811	0.454075	0.912744	-5.71775
13	TBRG1	transforming growth factor beta regulator 1	-0.8	0.687392	3.8678	1.95971	0.0709686	0.783067	-4.31643
14	VAPB	VAMP (vesicle-associated membrane protein)-associated protein B and C	-0.78	0.476402	4.50565	1.93494	0.074192	0.79107	-4.35389
15	APLN	apelin	-0.77	2.04507	5.66151	3.14529	0.00742249	0.504726	-2.3307
16	PCMT1	protein-L-isoaspartate (D-aspartate) O-methyltransferase	-0.77	0.436321	6.15768	1.35555	0.19745	0.85814	-5.14392
17	USP15	ubiquitin specific peptidase 15	-0.75	0.388778	2.77711	2.00864	0.0649745	0.777688	-4.24172
18	ZNF622	zinc finger protein 622	-0.73	0.71283	5.56948	1.57849	0.13755	0.845133	-4.86158
19	CNOT6L	CCR4-NOT transcription complex, subunit 6-like	-0.73	0.344095	3.93992	1.29792	0.216017	0.860775	-5.21178
20	SETD3	SET domain containing 3	-0.73	0.364418	4.85877	1.79036	0.0957988	0.828175	-4.56724
21	TLK1	tousled-like kinase 1	-0.73	0.432546	3.96049	1.08255	0.297932	0.895489	-5.44468
22	UBE2V1	ubiquitin-conjugating enzyme E2 variant 1	-0.72	0.350384	1.51236	1.46684	0.165285	0.845133	-5.00677
23	RBM6	RNA binding motif protein 6	-0.72	0.671814	4.34688	2.13796	0.051301	0.74611	-4.0399
24	CHEK1	checkpoint kinase 1	-0.72	0.377336	4.11199	1.10385	0.288913	0.895251	-5.42317
25	RNF24	ring finger protein 24	-0.72	0.495606	4.42177	1.85152	0.0860497	0.808777	-4.47813
26	TMEM100	transmembrane protein 100	-0.71	1.39457	2.22706	1.76798	0.0996046	0.836368	-4.5994
27	EMC4	ER membrane protein complex subunit 4	-0.71	0.36284	4.3309	1.02823	0.321882	0.895489	-5.49796
28	TUBA4A	tubulin, alpha 4a	-0.7	1.07994	3.37989	1.79529	0.094978	0.827279	-4.56012
29	SREK1	splicing regulatory glutamine/lysine-rich protein 1	-0.7	0.844688	3.29012	3.17324	0.00702704	0.499208	-2.28149
30	RAB9B	RAB9B, member RAS oncogene family	-0.69	0.22851	0.852318	0.642913	0.531031	0.917578	-5.80565
31	RASGEF1B	RasGEF domain family, member 1B	-0.69	0.2275	2.31402	0.62657	0.541373	0.920956	-5.81582
32	CCND2	cyclin D2	-0.69	0.269021	3.48659	0.304785	0.76517	1	-5.96445
33	RAB30	RAB30, member RAS oncogene family	-0.69	0.652115	2.67815	2.88145	0.0124315	0.554076	-2.79301
34	ARIH1	ariadne RBR E3 ubiquitin protein ligase 1	-0.69	0.197161	3.42851	0.664795	0.517358	0.913755	-5.79166
35	NUCKS1	nuclear casein kinase and cyclin-dependent kinase substrate 1	-0.68	0.410261	7.53621	1.16649	0.263574	0.879805	-5.35792
36	SIRT4	sirtuin 4	-0.67	0.7588	2.55489	3.46902	0.00393744	0.434264	-1.75991
37	C1orf21	chromosome 1 open reading frame 21	-0.67	0.392154	3.37686	0.672387	0.512662	0.912744	-5.78671
38	PAFAH1B1	platelet-activating factor acetylhydrolase 1b, regulatory subunit 1 (45kDa)	-0.67	0.707955	4.7682	3.45146	0.00407501	0.439582	-1.79087
39	SLC25A37	solute carrier family 25 (mitochondrial iron transporter), member 37	-0.67	0.940754	4.32475	2.71148	0.0172949	0.60889	-3.08732
40	SMS	spermine synthase	-0.67	0.862994	6.37526	2.7554	0.0158842	0.595506	-3.01163
41	FBXO21	F-box protein 21	-0.66	0.440874	4.11617	1.70205	0.111609	0.845133	-4.69274
42	NUP50	nucleoporin 50kDa	-0.66	0.336923	4.81056	0.936787	0.365296	0.900598	-5.58235
43	IPPK	inositol 1,3,4,5,6-pentakisphosphate 2-kinase	-0.65	0.535256	2.1084	2.28898	0.0387405	0.705794	-3.79713
44	CDC37L1	cell division cycle 37-like 1	-0.64	0.577713	3.53323	1.54801	0.144697	0.845133	-4.90194
45	TACC1	transforming, acidic coiled-coil containing protein 1	-0.64	0.618207	5.06722	1.60001	0.132689	0.845133	-4.83277
46	SMURF1	SMAD specific E3 ubiquitin protein ligase 1	-0.64	0.301265	4.04867	1.55661	0.142649	0.845133	-4.89061
47	C1QL3	complement component 1, q subcomponent-like 3	-0.63	0.855265	1.0413	2.35252	0.0343759	0.690273	-3.69298
48	KIF23	kinesin family member 23	-0.63	0.790695	4.13608	2.03378	0.0620784	0.775191	-4.20297
49	YRDC	yrdC N(6)-threonylcarbamoyltransferase domain containing	-0.62	0.482851	4.54421	1.7415	0.104282	0.842084	-4.63715
50	PAFAH1B2	platelet-activating factor acetylhydrolase 1b, catalytic subunit 2 (30kDa)	-0.61	0.369852	5.56597	1.40888	0.181447	0.849602	-5.07918
51	ELL	elongation factor RNA polymerase II	-0.6	0.384651	3.96194	1.60479	0.131629	0.845133	-4.82633
52	HSPA4L	heat shock 70kDa protein 4-like	-0.6	0.220614	2.08478	0.329684	0.746689	1	-5.95653
53	AXIN2	axin 2	-0.59	0.428087	3.03186	0.879174	0.39466	0.907821	-5.632
54	RNF144B	ring finger protein 144B	-0.59	1.923	3.48728	3.45647	0.00403526	0.43858	-1.78203
55	ZNRF2	zinc and ring finger 2	-0.59	0.334196	3.26704	1.1695	0.262401	0.879019	-5.35472
56	FAM133B	family with sequence similarity 133, member B	-0.58	0.628858	3.20333	1.63503	0.125094	0.845133	-4.78534
57	AEBP2	AE binding protein 2	-0.58	0.596456	3.88072	1.89855	0.0791696	0.799801	-4.40845
58	KCNN4	potassium intermediate/small conductance calcium-activated channel, subfamily N, member 4	-0.57	0.622741	4.48684	0.61546	0.548469	0.923613	-5.82259
59	PPM1A	protein phosphatase, Mg2+/Mn2+ dependent, 1A	-0.57	0.40007	3.92527	2.13797	0.0513001	0.74611	-4.03988
60	AK4	adenylate kinase 4	-0.56	1.59792	3.35105	2.00145	0.0658249	0.778064	-4.25276
61	MKNK1	MAP kinase interacting serine/threonine kinase 1	-0.56	0.424359	3.84931	1.36743	0.193787	0.857242	-5.12965
62	CDC27	cell division cycle 27	-0.56	0.742744	5.44072	3.38186	0.00466969	0.450262	-1.91362
63	CASK	calcium/calmodulin-dependent serine protein kinase (MAGUK family)	-0.56	0.248113	3.36925	0.83473	0.418371	0.912744	-5.66839
64	HMGA2	high mobility group AT-hook 2	-0.55	1.03176	1.2126	1.19158	0.253918	0.876624	-5.33098
65	USP25	ubiquitin specific peptidase 25	-0.55	0.577882	4.23785	1.64594	0.122806	0.845133	-4.77042
66	VEGFA	vascular endothelial growth factor A	-0.55	3.23028	5.78971	5.98639	3.85228e-05	0.10612	2.3379
67	CAPZA2	capping protein (actin filament) muscle Z-line, alpha 2	-0.55	0.410859	5.16716	1.2549	0.23077	0.866932	-5.26096
68	RPS6KA3	ribosomal protein S6 kinase, 90kDa, polypeptide 3	-0.55	0.902578	5.21847	2.37683	0.0328327	0.687941	-3.65285
69	SLC41A2	solute carrier family 41 (magnesium transporter), member 2	-0.55	0.883626	3.62199	2.1448	0.0506587	0.744809	-4.02907
70	FGFR1	fibroblast growth factor receptor 1	-0.55	0.38845	6.81387	0.600551	0.55807	0.926733	-5.83149
71	PPIL4	peptidylprolyl isomerase (cyclophilin)-like 4	-0.55	0.604495	4.89334	1.59661	0.133447	0.845133	-4.83734
72	MAFK	v-maf avian musculoaponeurotic fibrosarcoma oncogene homolog K	-0.54	0.865541	4.58894	1.73023	0.10633	0.84453	-4.65311
73	KIF1B	kinesin family member 1B	-0.54	0.328783	4.06674	1.17081	0.261892	0.878623	-5.35332
74	ZBTB44	zinc finger and BTB domain containing 44	-0.54	0.231419	3.64859	0.985064	0.341889	0.896015	-5.53863
75	NAPG	N-ethylmaleimide-sensitive factor attachment protein, gamma	-0.54	0.946483	4.3985	2.41127	0.0307596	0.6774	-3.59575
76	ATG14	autophagy related 14	-0.54	0.727362	4.20175	2.79109	0.0148209	0.586145	-2.94991
77	SLC7A2	solute carrier family 7 (cationic amino acid transporter, y+ system), member 2	-0.53	0.762404	3.52377	1.52116	0.151251	0.845133	-4.93704
78	ENTPD7	ectonucleoside triphosphate diphosphohydrolase 7	-0.53	0.464244	3.71921	1.81136	0.0923458	0.822019	-4.53684
79	KIF5C	kinesin family member 5C	-0.53	0.750773	0.709487	1.76365	0.100357	0.838247	-4.6056
80	USP14	ubiquitin specific peptidase 14 (tRNA-guanine transglycosylase)	-0.53	0.334312	5.55825	1.11847	0.28284	0.89085	-5.40821
81	ZBTB20	zinc finger and BTB domain containing 20	-0.53	0.314424	1.55923	0.945266	0.361106	0.899771	-5.57481
82	RUNX1T1	runt-related transcription factor 1; translocated to, 1 (cyclin D-related)	-0.52	0.713408	2.26456	1.05716	0.308959	0.895489	-5.46987
83	RASSF8	Ras association (RalGDS/AF-6) domain family (N-terminal) member 8	-0.52	0.543195	4.06197	1.98217	0.0681575	0.780895	-4.28226
84	LURAP1L	leucine rich adaptor protein 1-like	-0.52	0.869021	2.31287	1.34965	0.199288	0.858493	-5.15097
85	OIP5	Opa interacting protein 5	-0.52	0.471842	1.81535	1.10409	0.28881	0.895251	-5.42292
86	BTAF1	BTAF1 RNA polymerase II, B-TFIID transcription factor-associated, 170kDa	-0.51	0.806686	4.03379	2.634	0.0200868	0.627546	-3.22013
87	CLDN12	claudin 12	-0.51	0.778986	3.9103	2.65156	0.0194179	0.622937	-3.19011
88	IKBKB	inhibitor of kappa light polypeptide gene enhancer in B-cells, kinase beta	-0.51	0.206647	3.28255	0.641471	0.531939	0.917782	-5.80656
89	SALL4	sal-like 4 (Drosophila)	-0.51	0.495194	2.36843	0.7664	0.456608	0.912744	-5.72103
90	SNIP1	Smad nuclear interacting protein 1	-0.51	0.210532	3.83587	1.03249	0.319953	0.895489	-5.49386
91	MYBL1	v-myb avian myeloblastosis viral oncogene homolog-like 1	-0.5	0.898345	2.94163	1.74527	0.103604	0.841496	-4.6318
92	HELZ	helicase with zinc finger	-0.5	0.251915	4.22139	1.06916	0.30371	0.895489	-5.45803
93	NCS1	neuronal calcium sensor 1	-0.5	0.509532	5.72439	1.80147	0.0939581	0.826092	-4.55118
94	PDK3	pyruvate dehydrogenase kinase, isozyme 3	-0.5	0.571738	4.32248	1.33928	0.202555	0.858493	-5.1633
95	AHCYL2	adenosylhomocysteinase-like 2	-0.5	0.50405	4.096	1.24965	0.23262	0.868429	-5.26686
96	CHIC1	cysteine-rich hydrophobic domain 1	-0.5	0.604973	2.51508	1.84226	0.0874667	0.81177	-4.49173
97	PLEKHA5	pleckstrin homology domain containing, family A member 5	-0.49	0.721297	3.9186	2.01863	0.0638093	0.775762	-4.22636
98	PPM1E	protein phosphatase, Mg2+/Mn2+ dependent, 1E	-0.49	0.481688	1.61634	0.855217	0.407327	0.912744	-5.65182
99	E2F7	E2F transcription factor 7	-0.49	1.20064	2.99765	2.49901	0.0260276	0.655798	-3.44902
100	PDCD4	programmed cell death 4 (neoplastic transformation inhibitor)	-0.49	0.211037	4.78841	0.419519	0.681424	0.986206	-5.92289
101	ATF6	activating transcription factor 6	-0.49	0.320194	5.26617	1.139	0.274478	0.886984	-5.38692
102	ACTR2	ARP2 actin-related protein 2 homolog (yeast)	-0.48	0.233088	8.2023	0.739225	0.472407	0.912744	-5.74082
103	MED26	mediator complex subunit 26	-0.48	0.256875	2.51008	1.11622	0.283767	0.891436	-5.41052
104	INSR	insulin receptor	-0.48	0.299859	5.17618	0.772889	0.452885	0.912744	-5.7162
105	LAMTOR3	late endosomal/lysosomal adaptor, MAPK and MTOR activator 3	-0.48	0.195536	4.64381	1.25493	0.230758	0.866932	-5.26092
106	TRIP11	thyroid hormone receptor interactor 11	-0.48	0.585548	4.31984	1.92189	0.0759446	0.793514	-4.37353
107	COL12A1	collagen, type XII, alpha 1	-0.48	1.66033	8.09237	1.82287	0.0905004	0.819	-4.52009
108	UBE4A	ubiquitination factor E4A	-0.48	0.419704	4.36778	1.30011	0.215284	0.860466	-5.20923
109	NDP	Norrie disease (pseudoglioma)	-0.47	0.614035	2.21047	0.684783	0.505048	0.912744	-5.7785
110	TMEM161B	transmembrane protein 161B	-0.47	0.708259	2.14017	3.11626	0.00785669	0.513528	-2.38178
111	SPAG7	sperm associated antigen 7	-0.47	0.774173	5.01992	2.67661	0.0185012	0.614276	-3.14721
112	WBP11	WW domain binding protein 11	-0.47	0.206374	5.65189	0.838849	0.416136	0.912744	-5.66509
113	ZMYM2	zinc finger, MYM-type 2	-0.47	0.447628	3.75314	1.71843	0.108513	0.845133	-4.66975
114	MAP7	microtubule-associated protein 7	-0.47	0.212583	1.56407	0.306211	0.764107	1	-5.96401
115	UHMK1	U2AF homology motif (UHM) kinase 1	-0.47	0.301456	5.0695	1.05928	0.308026	0.895489	-5.46779
116	NRN1	neuritin 1	-0.47	1.62303	5.79062	3.828	0.00195674	0.365945	-1.12961
117	DDX3X	DEAD (Asp-Glu-Ala-Asp) box helicase 3, X-linked	-0.47	0.720066	5.83653	2.95867	0.010693	0.543873	-2.65824
118	KIF21A	kinesin family member 21A	-0.46	1.06835	3.28626	1.39719	0.184859	0.850931	-5.09352
119	TFRC	transferrin receptor	-0.46	1.0228	5.59611	3.09472	0.00819521	0.517902	-2.41967
120	TRMT112	tRNA methyltransferase 11-2 homolog (S. cerevisiae)	-0.46	0.708593	7.59958	1.61201	0.130043	0.845133	-4.81659
121	PID1	phosphotyrosine interaction domain containing 1	-0.46	0.233256	4.31852	0.402927	0.693299	0.991797	-5.9297
122	PRDM4	PR domain containing 4	-0.46	0.282985	4.03928	1.46938	0.164605	0.845133	-5.00354
123	CBX6	chromobox homolog 6	-0.46	0.411548	5.78149	1.07808	0.299853	0.895489	-5.44916
124	UBE2J1	ubiquitin-conjugating enzyme E2, J1	-0.46	0.277881	6.07795	1.13735	0.275143	0.887411	-5.38865
125	RECK	reversion-inducing-cysteine-rich protein with kazal motifs	-0.45	0.274239	3.29124	0.687574	0.503343	0.912744	-5.77663
126	RAB9A	RAB9A, member RAS oncogene family	-0.45	0.64878	4.75322	1.61992	0.128323	0.845133	-4.80588
127	ALAD	aminolevulinate dehydratase	-0.45	0.196415	4.69941	0.641717	0.531784	0.917743	-5.80641
128	ZNF449	zinc finger protein 449	-0.45	0.563816	2.53125	2.41257	0.0306837	0.6774	-3.59359
129	PLRG1	pleiotropic regulator 1	-0.45	0.336923	4.95482	1.70259	0.111505	0.845133	-4.69198
130	ZNF609	zinc finger protein 609	-0.45	0.388532	4.14162	1.11159	0.285687	0.893535	-5.41527
131	CPEB3	cytoplasmic polyadenylation element binding protein 3	-0.45	0.443215	1.53738	1.45154	0.16943	0.846856	-5.02609
132	C2orf72	chromosome 2 open reading frame 72	-0.45	0.692478	0.892532	1.73129	0.106136	0.844067	-4.65162
133	AVL9	AVL9 homolog (S. cerevisiase)	-0.45	0.537405	2.91293	1.8601	0.0847566	0.808005	-4.4655
134	YTHDC1	YTH domain containing 1	-0.45	0.427546	4.89894	1.56219	0.141333	0.845133	-4.88323
135	GAN	gigaxonin	-0.45	0.287999	2.29686	1.17296	0.261057	0.878468	-5.35102
136	ARL5B	ADP-ribosylation factor-like 5B	-0.45	0.282451	4.18286	0.625208	0.542241	0.921309	-5.81665
137	AIFM1	apoptosis-inducing factor, mitochondrion-associated, 1	-0.45	0.693938	3.17735	2.24623	0.0419663	0.717981	-3.86656
138	FAM81A	family with sequence similarity 81, member A	-0.45	0.303336	2.12376	0.775534	0.451373	0.912744	-5.71423
139	CYB5R4	cytochrome b5 reductase 4	-0.45	0.26277	2.18396	1.20163	0.250127	0.876067	-5.32005
140	KCNK10	potassium channel, subfamily K, member 10	-0.45	0.860027	0.671628	1.68968	0.113997	0.845133	-4.71001
141	CHAC1	ChaC, cation transport regulator homolog 1 (E. coli)	-0.44	1.28667	3.61943	3.20843	0.0065589	0.487689	-2.21949
142	CDK17	cyclin-dependent kinase 17	-0.44	0.261231	3.88852	0.891001	0.388505	0.904565	-5.62203
143	ATXN7L3	ataxin 7-like 3	-0.44	0.231372	5.52408	0.999473	0.335114	0.895656	-5.52522
144	USP3	ubiquitin specific peptidase 3	-0.44	0.440899	3.1167	1.71541	0.109079	0.845133	-4.67401
145	RYBP	RING1 and YY1 binding protein	-0.44	0.242431	4.1712	0.8245	0.423959	0.912744	-5.67653
146	RIMS3	regulating synaptic membrane exocytosis 3	-0.44	0.285181	1.90023	0.537948	0.599355	0.94676	-5.86661
147	RAB11FIP5	RAB11 family interacting protein 5 (class I)	-0.44	0.745791	4.8232	2.02309	0.0632948	0.775378	-4.21948
148	FAF1	Fas (TNFRSF6) associated factor 1	-0.44	0.274128	4.32999	1.44733	0.170586	0.846856	-5.03138
149	PHKA1	phosphorylase kinase, alpha 1 (muscle)	-0.44	1.42199	1.98903	2.18854	0.0467221	0.728574	-3.95939
150	CDC6	cell division cycle 6	-0.44	0.428273	4.21179	1.20434	0.249112	0.875593	-5.31709
151	MIPOL1	mirror-image polydactyly 1	-0.43	0.323829	0.71302	1.83879	0.0880028	0.81289	-4.49682
152	SCN8A	sodium channel, voltage gated, type VIII, alpha subunit	-0.43	0.552126	0.963597	1.30782	0.212731	0.860466	-5.20028
153	CDC14A	cell division cycle 14A	-0.43	0.202078	1.798	0.556777	0.586776	0.939966	-5.85644
154	KIF5A	kinesin family member 5A	-0.43	0.226822	0.383135	1.27835	0.222629	0.864579	-5.2343
155	FGF18	fibroblast growth factor 18	-0.43	0.336942	0.905867	1.19092	0.254168	0.876624	-5.33169
156	MAP2K1	mitogen-activated protein kinase kinase 1	-0.43	0.727596	5.95054	2.47833	0.0270753	0.660342	-3.48375
157	ELOVL6	ELOVL fatty acid elongase 6	-0.43	0.338007	2.97079	0.621896	0.544352	0.921957	-5.81868
158	CD2AP	CD2-associated protein	-0.43	0.540398	4.08608	1.40795	0.181717	0.849602	-5.08032
159	ING2	inhibitor of growth family, member 2	-0.43	0.444345	3.6553	1.13564	0.275831	0.887485	-5.39042
160	GSTCD	glutathione S-transferase, C-terminal domain containing	-0.42	0.296845	2.75933	1.38673	0.187958	0.853818	-5.10629
161	IHH	indian hedgehog	-0.42	0.25202	2.32808	0.29454	0.772818	1	-5.96753
162	CD28	CD28 molecule	-0.42	0.192625	2.16668	0.754701	0.463369	0.912744	-5.72963
163	ELL2	elongation factor, RNA polymerase II, 2	-0.42	1.26509	5.17208	3.68249	0.00259585	0.410351	-1.38432
164	GPATCH8	G patch domain containing 8	-0.42	0.369015	4.33329	2.07585	0.0574965	0.761823	-4.13759
165	GATAD2A	GATA zinc finger domain containing 2A	-0.42	0.205288	5.76972	0.831241	0.420272	0.912744	-5.67118
166	PSAT1	phosphoserine aminotransferase 1	-0.42	1.41111	6.49453	2.29934	0.0379947	0.705374	-3.78022
167	CLCN5	chloride channel, voltage-sensitive 5	-0.42	0.744342	2.96429	1.4601	0.1671	0.845155	-5.01529
168	PRR11	proline rich 11	-0.42	0.360295	5.25105	1.03939	0.31685	0.895489	-5.4872
169	SLC2A3	solute carrier family 2 (facilitated glucose transporter), member 3	-0.41	1.87026	4.95261	3.61573	0.00295643	0.417915	-1.50158
170	G0S2	G0/G1switch 2	-0.41	1.06268	4.5591	1.79462	0.0950894	0.827279	-4.56109
171	FAM91A1	family with sequence similarity 91, member A1	-0.41	0.49818	5.22589	1.46022	0.167067	0.845155	-5.01514
172	C11orf24	chromosome 11 open reading frame 24	-0.41	0.323051	6.57113	0.96467	0.351644	0.898444	-5.55733
173	STX17	syntaxin 17	-0.41	0.251806	3.37469	0.926026	0.370663	0.901075	-5.59183
174	YAP1	Yes-associated protein 1	-0.41	0.497405	5.48515	2.02428	0.0631579	0.775191	-4.21764
175	SMAD3	SMAD family member 3	-0.41	0.222627	5.13696	0.50065	0.624666	0.959256	-5.88578
176	MOCS1	molybdenum cofactor synthesis 1	-0.41	0.523872	3.88365	0.986457	0.34123	0.895833	-5.53734
177	SEMA3A	sema domain, immunoglobulin domain (Ig), short basic domain, secreted, (semaphorin) 3A	-0.41	0.995791	3.94739	1.30676	0.213081	0.860466	-5.20151
178	SYDE2	synapse defective 1, Rho GTPase, homolog 2 (C. elegans)	-0.4	0.709613	2.37693	2.49816	0.02607	0.656308	-3.45045
179	PAM	peptidylglycine alpha-amidating monooxygenase	-0.4	0.719426	5.73636	1.35404	0.197919	0.858493	-5.14573
180	IPO7	importin 7	-0.4	0.278168	6.20354	1.17109	0.261782	0.878575	-5.35302
181	SOBP	sine oculis binding protein homolog (Drosophila)	-0.4	0.329918	3.97379	0.865552	0.40183	0.910585	-5.64333
182	EYA1	eyes absent homolog 1 (Drosophila)	-0.4	0.854276	3.07491	1.19993	0.250767	0.876114	-5.32191
183	TMEM87B	transmembrane protein 87B	-0.4	0.283729	4.33166	0.687175	0.503587	0.912744	-5.7769
184	APP	amyloid beta (A4) precursor protein	-0.4	0.503846	9.36015	1.19255	0.253549	0.876624	-5.32992
185	SNX11	sorting nexin 11	-0.4	0.643676	4.1901	2.37836	0.032738	0.687396	-3.65032
186	FRS2	fibroblast growth factor receptor substrate 2	-0.4	0.377318	3.92221	1.22332	0.242099	0.873421	-5.29624
187	NFE2L1	nuclear factor, erythroid 2-like 1	-0.4	0.581034	7.3448	1.89736	0.0793373	0.799801	-4.41023
188	MKX	mohawk homeobox	-0.4	1.22413	2.62226	1.79817	0.0945017	0.82726	-4.55596
189	NAA25	N(alpha)-acetyltransferase 25, NatB auxiliary subunit	-0.4	0.348231	3.50545	0.957542	0.355099	0.899235	-5.56379
190	DCAF8	DDB1- and CUL4-associated factor 8	-0.4	0.398695	3.61363	1.42791	0.176003	0.847977	-5.05564
191	STXBP5	syntaxin binding protein 5 (tomosyn)	-0.4	0.532028	2.94754	1.36452	0.194678	0.857487	-5.13315
192	NUFIP2	nuclear fragile X mental retardation protein interacting protein 2	-0.4	0.51346	5.06582	2.0704	0.0580715	0.762471	-4.14609
193	CYP26B1	cytochrome P450, family 26, subfamily B, polypeptide 1	-0.39	0.596137	3.90393	1.17098	0.261824	0.878575	-5.35313
194	C16orf72	chromosome 16 open reading frame 72	-0.39	0.232053	4.05884	0.695653	0.498427	0.912744	-5.77119
195	BOLA3	bolA family member 3	-0.39	0.510551	2.40207	2.35469	0.0342356	0.690273	-3.68941
196	PIM1	pim-1 oncogene	-0.39	0.769356	5.53809	1.26367	0.227699	0.865751	-5.25103
197	ABL2	c-abl oncogene 2, non-receptor tyrosine kinase	-0.39	0.21042	3.92481	0.682947	0.506172	0.912744	-5.77972
198	TMED8	transmembrane emp24 protein transport domain containing 8	-0.39	0.266813	3.98338	0.932869	0.367244	0.900598	-5.58581
199	CEP55	centrosomal protein 55kDa	-0.39	0.277142	4.48577	0.635273	0.535852	0.918985	-5.81044
200	DPY19L4	dpy-19-like 4 (C. elegans)	-0.39	0.216933	4.1892	0.838296	0.416435	0.912744	-5.66553
201	CCDC85C	coiled-coil domain containing 85C	-0.39	0.307806	1.81391	1.18771	0.25539	0.876624	-5.33517
202	SMAD5	SMAD family member 5	-0.39	0.306422	4.81769	1.06676	0.304753	0.895489	-5.4604
203	PIAS2	protein inhibitor of activated STAT, 2	-0.39	0.470076	2.68812	1.41107	0.180814	0.849397	-5.07648
204	RNF111	ring finger protein 111	-0.39	0.275037	3.96433	1.19574	0.252344	0.876492	-5.32647
205	LHX4	LIM homeobox 4	-0.39	0.350133	0.670006	1.08609	0.296418	0.895489	-5.44113
206	FANCB	Fanconi anemia, complementation group B	-0.39	0.363634	2.04154	1.18145	0.257782	0.87731	-5.34191
207	CCDC6	coiled-coil domain containing 6	-0.39	0.239062	4.90511	0.822103	0.425276	0.912744	-5.67842
208	EPHA7	EPH receptor A7	-0.38	0.210395	0.606571	0.439831	0.667006	0.978587	-5.91419
209	FERMT2	fermitin family member 2	-0.38	0.585049	5.85333	1.88878	0.0805567	0.803306	-4.42301
210	TTC14	tetratricopeptide repeat domain 14	-0.38	0.33994	2.91756	1.21832	0.24393	0.873421	-5.30176
211	TLL1	tolloid-like 1	-0.38	0.31955	1.44717	0.634663	0.536238	0.919178	-5.81082
212	PIEZO1	piezo-type mechanosensitive ion channel component 1	-0.38	0.199834	5.78647	0.527289	0.606535	0.950817	-5.87223
213	BTF3	basic transcription factor 3	-0.38	0.621926	6.9749	2.54825	0.0236869	0.644274	-3.36594
214	VAMP1	vesicle-associated membrane protein 1 (synaptobrevin 1)	-0.38	0.279695	2.86827	0.682692	0.506328	0.912744	-5.7799
215	DMTF1	cyclin D binding myb-like transcription factor 1	-0.38	0.432617	3.84812	1.77539	0.0983298	0.834567	-4.58878
216	MIB1	mindbomb E3 ubiquitin protein ligase 1	-0.38	0.372477	4.56136	1.14918	0.2704	0.882706	-5.37625
217	ACACB	acetyl-CoA carboxylase beta	-0.38	0.197469	2.25277	0.515789	0.61433	0.954199	-5.87816
218	CALU	calumenin	-0.38	0.71161	8.43436	1.30638	0.213205	0.860466	-5.20195
219	RAB3D	RAB3D, member RAS oncogene family	-0.38	0.28238	2.79593	0.609093	0.552558	0.924627	-5.82641
220	RIMKLB	ribosomal modification protein rimK-like family member B	-0.38	0.472685	3.15898	1.47985	0.16183	0.845133	-4.99024
221	USP12	ubiquitin specific peptidase 12	-0.38	0.443279	4.00542	2.26576	0.0404626	0.712264	-3.83491
222	STYX	serine/threonine/tyrosine interacting protein	-0.38	0.420501	4.59966	1.71152	0.10981	0.845133	-4.67947
223	RAD23B	RAD23 homolog B (S. cerevisiae)	-0.37	0.260395	7.12671	1.12224	0.281288	0.890039	-5.40432
224	ATXN7L1	ataxin 7-like 1	-0.37	0.46859	2.408	1.84022	0.0877816	0.812827	-4.49473
225	PLXNC1	plexin C1	-0.37	0.643768	2.70441	2.04541	0.0607785	0.76993	-4.18495
226	CNTNAP1	contactin associated protein 1	-0.37	0.375879	2.9953	0.816196	0.428531	0.912744	-5.68307
227	ASH1L	ash1 (absent, small, or homeotic)-like (Drosophila)	-0.37	0.426928	4.43895	1.51026	0.153983	0.845133	-4.95117
228	GOLGA1	golgin A1	-0.37	0.430863	3.70903	1.80843	0.0928199	0.824159	-4.54109
229	CLCN4	chloride channel, voltage-sensitive 4	-0.37	0.411756	3.64613	0.670322	0.513937	0.913059	-5.78806
230	PRKAB2	protein kinase, AMP-activated, beta 2 non-catalytic subunit	-0.37	0.7793	5.04388	2.76092	0.0157149	0.595409	-3.00209
231	ARHGAP5	Rho GTPase activating protein 5	-0.37	0.366964	3.62278	1.04869	0.312703	0.895489	-5.47817
232	EIF5A	eukaryotic translation initiation factor 5A	-0.37	0.215898	8.30543	0.843628	0.413551	0.912744	-5.66124
233	AHNAK2	AHNAK nucleoprotein 2	-0.37	1.02758	2.81317	1.45881	0.167451	0.845366	-5.01693
234	DZIP1	DAZ interacting zinc finger protein 1	-0.37	0.774605	3.86708	2.72894	0.0167199	0.605409	-3.05725
235	SEC24A	SEC24 family, member A (S. cerevisiae)	-0.37	0.929333	4.69889	2.64066	0.0198307	0.625874	-3.20876
236	LRRFIP2	leucine rich repeat (in FLII) interacting protein 2	-0.37	0.28442	3.71136	1.24707	0.233537	0.869046	-5.26977
237	WDFY2	WD repeat and FYVE domain containing 2	-0.37	0.498176	2.01708	2.65483	0.0192958	0.621452	-3.18452
238	PLAGL1	pleiomorphic adenoma gene-like 1	-0.36	0.284677	2.96338	0.326061	0.749369	1	-5.95772
239	PDCD1	programmed cell death 1	-0.36	0.283783	1.10235	0.573245	0.575887	0.936022	-5.84726
240	RBBP6	retinoblastoma binding protein 6	-0.36	0.772977	4.3755	2.14718	0.0504368	0.743688	-4.02529
241	KANK1	KN motif and ankyrin repeat domains 1	-0.36	0.898851	3.32133	2.00117	0.0658586	0.778064	-4.25319
242	RSBN1	round spermatid basic protein 1	-0.36	0.292633	3.75576	1.38446	0.188638	0.853818	-5.10905
243	MBNL2	muscleblind-like splicing regulator 2	-0.36	0.357067	4.93312	1.05704	0.30901	0.895489	-5.46999
244	TRABD2B	TraB domain containing 2B	-0.36	0.244881	0.418572	0.970234	0.348963	0.897791	-5.55226
245	GCNT4	glucosaminyl (N-acetyl) transferase 4, core 2	-0.36	0.475015	0.722497	1.8576	0.0851315	0.808777	-4.46918
246	UBR3	ubiquitin protein ligase E3 component n-recognin 3 (putative)	-0.36	0.380468	4.20403	1.09302	0.293472	0.895489	-5.43415
247	GOLT1B	golgi transport 1B	-0.36	0.457232	5.7561	1.68059	0.115782	0.845133	-4.72265
248	KCNK15	potassium channel, subfamily K, member 15	-0.36	0.434982	0.863531	0.98462	0.342099	0.896015	-5.53904
249	ANLN	anillin, actin binding protein	-0.35	0.789578	5.12127	1.87362	0.082753	0.804123	-4.44552
250	GNAQ	guanine nucleotide binding protein (G protein), q polypeptide	-0.35	0.322073	5.44172	1.84468	0.0870943	0.811637	-4.48818
251	PDIA6	protein disulfide isomerase family A, member 6	-0.35	0.442349	7.38838	0.858156	0.405759	0.912098	-5.64942
252	RAP2C	RAP2C, member of RAS oncogene family	-0.35	0.204609	5.08286	0.642014	0.531597	0.917702	-5.80622
253	BCL7A	B-cell CLL/lymphoma 7A	-0.35	0.251875	3.54788	0.444207	0.663918	0.977412	-5.91227
254	SVEP1	sushi, von Willebrand factor type A, EGF and pentraxin domain containing 1	-0.35	0.298761	3.23076	0.441127	0.666091	0.97819	-5.91363
255	KLF7	Kruppel-like factor 7 (ubiquitous)	-0.35	0.339863	3.61156	1.54066	0.146467	0.845133	-4.91159
256	ZNF275	zinc finger protein 275	-0.35	0.195865	4.48941	0.425331	0.677285	0.984117	-5.92044
257	POU2F1	POU class 2 homeobox 1	-0.35	0.227848	3.32874	1.34279	0.201445	0.858493	-5.15913
258	CTDSP2	CTD (carboxy-terminal domain, RNA polymerase II, polypeptide A) small phosphatase 2	-0.35	1.11098	7.27907	2.63034	0.0202293	0.628642	-3.22639
259	STXBP3	syntaxin binding protein 3	-0.35	0.42784	4.60859	1.28541	0.220224	0.863256	-5.2262
260	SYPL1	synaptophysin-like 1	-0.35	0.558049	6.43063	1.62099	0.128093	0.845133	-4.80444
261	SLC36A1	solute carrier family 36 (proton/amino acid symporter), member 1	-0.34	0.221972	4.03034	0.891726	0.38813	0.904446	-5.62142
262	FNTA	farnesyltransferase, CAAX box, alpha	-0.34	0.232893	3.98472	0.864954	0.402146	0.910673	-5.64382
263	ZBTB43	zinc finger and BTB domain containing 43	-0.34	0.724703	3.68103	2.5764	0.0224412	0.640866	-3.31822
264	ARPP21	cAMP-regulated phosphoprotein, 21kDa	-0.34	0.229655	0.625062	0.487494	0.633716	0.962702	-5.89223
265	RNF43	ring finger protein 43	-0.34	0.365149	0.372309	1.54539	0.145326	0.845133	-4.90539
266	LARP1B	La ribonucleoprotein domain family, member 1B	-0.34	0.527903	2.93578	1.96353	0.0704833	0.783046	-4.31064
267	TMEM178B	transmembrane protein 178B	-0.34	0.265706	0.499557	0.889334	0.389369	0.905464	-5.62344
268	PRR15L	proline rich 15-like	-0.34	0.561078	0.449593	2.83126	0.0137075	0.574027	-2.88027
269	CNIH3	cornichon family AMPA receptor auxiliary protein 3	-0.34	0.815155	2.04601	1.43473	0.174084	0.847721	-5.04714
270	NEBL	nebulette	-0.34	0.937014	0.99058	2.20082	0.0456694	0.726974	-3.93972
271	PPM1H	protein phosphatase, Mg2+/Mn2+ dependent, 1H	-0.34	0.236789	2.73177	0.34988	0.731818	1	-5.94965
272	EIF3M	eukaryotic translation initiation factor 3, subunit M	-0.34	0.28938	4.92585	0.992256	0.338495	0.895752	-5.53196
273	SLC39A9	solute carrier family 39, member 9	-0.34	0.686756	5.67628	2.61615	0.0207895	0.632796	-3.25059
274	SOWAHC	sosondowah ankyrin repeat domain family member C	-0.34	0.343953	3.30632	0.85557	0.407139	0.912677	-5.65154
275	BACE1	beta-site APP-cleaving enzyme 1	-0.34	0.254709	4.29219	0.870134	0.399408	0.910031	-5.63954
276	KLHL15	kelch-like family member 15	-0.34	0.390486	3.4456	1.14349	0.272674	0.884561	-5.38223
277	KHNYN	KH and NYN domain containing	-0.34	0.421502	4.41586	1.05335	0.310639	0.895489	-5.47361
278	AKIRIN1	akirin 1	-0.34	0.194399	6.73701	0.589315	0.565365	0.930771	-5.83806
279	HOXA3	homeobox A3	-0.34	0.513562	2.10664	0.935525	0.365923	0.900598	-5.58346
280	KPNA3	karyopherin alpha 3 (importin alpha 4)	-0.34	0.382489	5.43491	1.8719	0.0830046	0.804382	-4.44805
281	FAM122B	family with sequence similarity 122B	-0.34	0.481674	4.00322	1.76212	0.100624	0.838247	-4.60779
282	ELK4	ELK4, ETS-domain protein (SRF accessory protein 1)	-0.34	0.27027	4.21059	0.683068	0.506098	0.912744	-5.77964
283	TRAM1	translocation associated membrane protein 1	-0.34	0.413197	7.75272	2.51633	0.0251797	0.650615	-3.41984
284	CBX5	chromobox homolog 5	-0.34	0.328281	5.65956	0.801941	0.436452	0.912744	-5.69416
285	COPS2	COP9 signalosome subunit 2	-0.33	0.215457	4.58715	0.709783	0.489897	0.912744	-5.76153
286	ARFGAP2	ADP-ribosylation factor GTPase activating protein 2	-0.33	0.274838	4.94917	0.752804	0.464471	0.912744	-5.73101
287	PMM1	phosphomannomutase 1	-0.33	0.443404	3.49512	1.18885	0.254957	0.876624	-5.33394
288	RASEF	RAS and EF-hand domain containing	-0.33	0.693243	0.383943	2.1961	0.0460713	0.727593	-3.94729
289	SLC15A4	solute carrier family 15 (oligopeptide transporter), member 4	-0.33	0.806193	4.73565	3.8841	0.00175543	0.354108	-1.03181
290	CSRNP1	cysteine-serine-rich nuclear protein 1	-0.33	0.481111	4.39481	1.40827	0.181622	0.849602	-5.07992
291	PAG1	phosphoprotein associated with glycosphingolipid microdomains 1	-0.33	0.611793	2.69567	1.22668	0.240871	0.873302	-5.29251
292	MAP4	microtubule-associated protein 4	-0.33	0.239308	6.17733	1.05582	0.309549	0.895489	-5.47119
293	FOSL1	FOS-like antigen 1	-0.33	1.9445	4.74312	3.13341	0.00759726	0.509326	-2.35161
294	CPD	carboxypeptidase D	-0.33	0.559934	4.40577	1.3946	0.185622	0.851533	-5.09669
295	IGF1R	insulin-like growth factor 1 receptor	-0.33	0.25773	4.55692	0.253364	0.803798	1	-5.97886
296	SPTLC1	serine palmitoyltransferase, long chain base subunit 1	-0.33	0.596699	5.10855	2.45369	0.028377	0.668745	-3.52502
297	ENAH	enabled homolog (Drosophila)	-0.33	0.261772	5.78023	0.634143	0.536567	0.919218	-5.81114
298	ZBTB33	zinc finger and BTB domain containing 33	-0.33	0.249311	4.52437	0.749822	0.466207	0.912744	-5.73318
299	FOXK1	forkhead box K1	-0.33	0.644496	4.76868	2.20309	0.0454768	0.726974	-3.93607
300	VEZT	vezatin, adherens junctions transmembrane protein	-0.33	0.347419	4.33976	1.36172	0.195542	0.857971	-5.13653
301	G2E3	G2/M-phase specific E3 ubiquitin protein ligase	-0.32	0.194662	3.43757	0.641614	0.531848	0.917767	-5.80647
302	EIF4B	eukaryotic translation initiation factor 4B	-0.32	0.538491	7.01904	1.9449	0.0728812	0.78776	-4.33887
303	TAF15	TAF15 RNA polymerase II, TATA box binding protein (TBP)-associated factor, 68kDa	-0.32	0.749984	5.98778	1.5466	0.145035	0.845133	-4.9038
304	PPP2R5C	protein phosphatase 2, regulatory subunit B', gamma	-0.32	0.23066	4.85755	0.767442	0.456009	0.912744	-5.72026
305	SPSB4	splA/ryanodine receptor domain and SOCS box containing 4	-0.32	0.230765	1.82274	0.412814	0.686213	0.988333	-5.92567
306	GPN1	GPN-loop GTPase 1	-0.32	0.258183	4.43889	1.19948	0.250933	0.876114	-5.32239
307	RAPGEF2	Rap guanine nucleotide exchange factor (GEF) 2	-0.32	0.298094	3.82588	1.08265	0.297892	0.895489	-5.44459
308	SLC4A4	solute carrier family 4 (sodium bicarbonate cotransporter), member 4	-0.32	0.209621	1.76861	0.423009	0.678938	0.98499	-5.92142
309	PI4K2B	phosphatidylinositol 4-kinase type 2 beta	-0.32	0.198528	4.22576	0.48523	0.635279	0.963496	-5.89332
310	LRP6	low density lipoprotein receptor-related protein 6	-0.32	0.313508	3.5266	1.33331	0.204453	0.858493	-5.17036
311	NKD1	naked cuticle homolog 1 (Drosophila)	-0.32	0.552206	1.75224	1.48376	0.160802	0.845133	-4.98525
312	BPTF	bromodomain PHD finger transcription factor	-0.32	0.19394	4.31474	0.886919	0.390622	0.90556	-5.62548
313	UBE2W	ubiquitin-conjugating enzyme E2W (putative)	-0.32	0.220995	3.52151	1.35914	0.196336	0.857971	-5.13961
314	STAG1	stromal antigen 1	-0.32	0.697802	3.77668	1.56751	0.140089	0.845133	-4.87618
315	AMOTL1	angiomotin like 1	-0.32	0.500497	4.40631	1.21245	0.246096	0.87421	-5.30821
316	FNDC3B	fibronectin type III domain containing 3B	-0.32	0.394244	5.64498	1.09645	0.292024	0.895489	-5.43069
317	CDK1	cyclin-dependent kinase 1	-0.32	0.412104	4.97383	1.02874	0.32165	0.895489	-5.49747
318	HMGCR	3-hydroxy-3-methylglutaryl-CoA reductase	-0.32	0.658838	4.16182	2.42252	0.0301096	0.673574	-3.57703
319	ZSWIM3	zinc finger, SWIM-type containing 3	-0.31	0.256163	2.83813	1.0848	0.296968	0.895489	-5.44242
320	CMPK1	cytidine monophosphate (UMP-CMP) kinase 1, cytosolic	-0.31	0.616961	6.8325	3.65603	0.00273309	0.415512	-1.43077
321	EGLN2	egl-9 family hypoxia-inducible factor 2	-0.31	0.36192	1.59513	0.995845	0.336811	0.895712	-5.52861
322	MPHOSPH9	M-phase phosphoprotein 9	-0.31	0.669599	3.20607	2.08916	0.0561131	0.757758	-4.11677
323	ZHX1	zinc fingers and homeoboxes 1	-0.31	0.302453	4.43732	0.654495	0.523768	0.914539	-5.7983
324	DNAJA2	DnaJ (Hsp40) homolog, subfamily A, member 2	-0.31	0.225484	5.10099	0.756476	0.462339	0.912744	-5.72833
325	CHD2	chromodomain helicase DNA binding protein 2	-0.31	0.934814	3.8363	2.85543	0.0130778	0.562539	-2.83828
326	EGLN1	egl-9 family hypoxia-inducible factor 1	-0.31	1.14646	3.2292	2.59924	0.0214774	0.635742	-3.2794
327	CHPT1	choline phosphotransferase 1	-0.31	0.778649	3.73474	2.59998	0.0214467	0.635742	-3.27814
328	SH2D2A	SH2 domain containing 2A	-0.31	0.456259	2.45203	1.24994	0.232521	0.868429	-5.26655
329	B4GALT1	UDP-Gal:betaGlcNAc beta 1,4- galactosyltransferase, polypeptide 1	-0.31	0.393176	6.76256	1.25155	0.23195	0.868184	-5.26473
330	LRIG1	leucine-rich repeats and immunoglobulin-like domains 1	-0.31	0.484622	2.72832	0.609016	0.552607	0.924627	-5.82646
331	SLC6A4	solute carrier family 6 (neurotransmitter transporter), member 4	-0.31	0.306305	0.314206	3.71694	0.00242757	0.403442	-1.3239
332	DEDD	death effector domain containing	-0.31	0.340666	4.63931	1.57403	0.138576	0.845133	-4.86751
333	UBR4	ubiquitin protein ligase E3 component n-recognin 4	-0.31	0.385333	4.70989	1.45468	0.168574	0.845888	-5.02214
334	TNMD	tenomodulin	-0.31	0.340343	0.656146	1.045	0.314343	0.895489	-5.48176
335	CLOCK	clock circadian regulator	-0.3	0.204399	4.08978	0.874589	0.397064	0.908902	-5.63583
336	PNISR	PNN-interacting serine/arginine-rich protein	-0.3	0.720207	4.04241	2.07096	0.0580118	0.762338	-4.14521
337	ZC3H6	zinc finger CCCH-type containing 6	-0.3	0.711669	1.94573	3.36204	0.00485445	0.450262	-1.94858
338	BAG5	BCL2-associated athanogene 5	-0.3	0.834976	5.2491	1.98444	0.0678782	0.780744	-4.27879
339	C11orf68	chromosome 11 open reading frame 68	-0.3	0.261825	6.56635	0.82216	0.425244	0.912744	-5.67838
340	TGFBR3	transforming growth factor, beta receptor III	-0.3	0.209394	2.34206	0.513673	0.61577	0.954859	-5.87924
341	IL2RB	interleukin 2 receptor, beta	-0.3	0.722774	3.85264	1.27568	0.223544	0.864909	-5.23735
342	DCUN1D4	DCN1, defective in cullin neddylation 1, domain containing 4	-0.3	0.21378	4.40719	0.770062	0.454505	0.912744	-5.71831
343	ATP7A	ATPase, Cu++ transporting, alpha polypeptide	-0.3	0.718565	3.24897	1.97211	0.0694042	0.781797	-4.2976
344	POLE4	polymerase (DNA-directed), epsilon 4, accessory subunit	-0.3	0.34984	5.2365	1.3098	0.212079	0.860466	-5.19797
345	CRK	v-crk avian sarcoma virus CT10 oncogene homolog	-0.3	0.412938	6.60825	1.86409	0.084161	0.806827	-4.45961
346	SIPA1L2	signal-induced proliferation-associated 1 like 2	-0.3	0.324616	3.34422	1.06783	0.30429	0.895489	-5.45935
347	MAPK1IP1L	mitogen-activated protein kinase 1 interacting protein 1-like	-0.3	0.298871	5.90585	1.34719	0.200058	0.858493	-5.15389
348	DCAF5	DDB1 and CUL4 associated factor 5	-0.3	0.449937	4.95566	2.3103	0.0372205	0.701969	-3.7623
349	SPRTN	SprT-like N-terminal domain	-0.3	0.389098	2.89679	1.47143	0.164058	0.845133	-5.00094
350	HNRNPA2B1	heterogeneous nuclear ribonucleoprotein A2/B1	-0.3	0.759775	7.05737	1.56534	0.140595	0.845133	-4.87905
351	NBR1	neighbor of BRCA1 gene 1	-0.29	0.482233	5.1773	1.78011	0.0975251	0.833528	-4.582
352	EED	embryonic ectoderm development	-0.29	0.391133	3.13368	1.63146	0.125851	0.845133	-4.7902
353	HOXC8	homeobox C8	-0.29	0.521493	3.09462	0.870555	0.399186	0.910031	-5.63919
354	MT2A	metallothionein 2A	-0.29	0.490348	8.77281	0.677053	0.509789	0.912744	-5.78363
355	RAB40A	RAB40A, member RAS oncogene family	-0.29	0.431894	0.53444	2.83697	0.0135562	0.572644	-2.87036
356	ESRRA	estrogen-related receptor alpha	-0.29	0.778959	4.95851	1.83193	0.0890715	0.815559	-4.50686
357	MT1G	metallothionein 1G	-0.29	0.837167	5.33298	0.965516	0.351235	0.898199	-5.55656
358	DIXDC1	DIX domain containing 1	-0.29	0.198746	3.43501	0.614034	0.549383	0.923889	-5.82345
359	PRPF38A	pre-mRNA processing factor 38A	-0.29	0.229147	4.96238	0.965514	0.351236	0.898199	-5.55656
360	SRSF11	serine/arginine-rich splicing factor 11	-0.29	0.440119	5.99045	1.39737	0.184806	0.850931	-5.0933
361	KBTBD2	kelch repeat and BTB (POZ) domain containing 2	-0.29	0.196128	5.16394	0.637413	0.534499	0.918696	-5.8091
362	PRSS12	protease, serine, 12 (neurotrypsin, motopsin)	-0.29	0.2228	0.855421	0.280493	0.783345	1	-5.97159
363	UBN2	ubinuclein 2	-0.29	0.491521	2.79759	2.33273	0.0356829	0.694871	-3.72554
364	HMBOX1	homeobox containing 1	-0.29	0.277076	3.30435	1.05685	0.309092	0.895489	-5.47017
365	TMEM135	transmembrane protein 135	-0.29	0.350547	2.82447	0.843861	0.413425	0.912744	-5.66105
366	PIK3R1	phosphoinositide-3-kinase, regulatory subunit 1 (alpha)	-0.29	0.373978	4.66243	0.925602	0.370876	0.901075	-5.5922
367	CAMSAP1	calmodulin regulated spectrin-associated protein 1	-0.29	0.381438	3.87166	1.28338	0.220913	0.863256	-5.22853
368	SUCO	SUN domain containing ossification factor	-0.29	0.244669	4.58382	0.774536	0.451943	0.912744	-5.71497
369	IDH3A	isocitrate dehydrogenase 3 (NAD+) alpha	-0.29	0.420813	3.52556	1.42996	0.175424	0.847721	-5.05309
370	PTPRD	protein tyrosine phosphatase, receptor type, D	-0.29	0.232741	4.65476	0.548709	0.592149	0.942804	-5.86084
371	YIPF6	Yip1 domain family, member 6	-0.29	0.372884	4.49015	1.23515	0.237803	0.872004	-5.2831
372	PPP2R1B	protein phosphatase 2, regulatory subunit A, beta	-0.29	0.380814	4.09656	1.09532	0.2925	0.895489	-5.43183
373	UBE2B	ubiquitin-conjugating enzyme E2B	-0.29	0.411971	5.42666	1.87965	0.081873	0.804123	-4.43657
374	CADM1	cell adhesion molecule 1	-0.29	0.663591	6.12197	1.08445	0.297122	0.895489	-5.44278
375	DCUN1D5	DCN1, defective in cullin neddylation 1, domain containing 5	-0.29	0.777423	3.02797	2.93563	0.0111849	0.544132	-2.6985
376	PLCD1	phospholipase C, delta 1	-0.28	0.737484	4.62223	1.90734	0.0779407	0.797705	-4.39533
377	RAB4B	RAB4B, member RAS oncogene family	-0.28	0.335986	1.21801	0.826118	0.423072	0.912744	-5.67525
378	HECTD1	HECT domain containing E3 ubiquitin protein ligase 1	-0.28	0.318039	5.14701	1.09354	0.293254	0.895489	-5.43363
379	HAS2	hyaluronan synthase 2	-0.28	0.908782	4.38475	0.776265	0.450956	0.912744	-5.71368
380	EZH1	enhancer of zeste homolog 1 (Drosophila)	-0.28	0.307202	3.44685	1.4812	0.161473	0.845133	-4.98851
381	TVP23B	trans-golgi network vesicle protein 23 homolog B (S. cerevisiae)	-0.28	0.487831	4.35218	0.940031	0.363689	0.900598	-5.57947
382	PTGFR	prostaglandin F receptor (FP)	-0.28	2.28159	3.97602	2.69875	0.0177261	0.612211	-3.1092
383	JPH1	junctophilin 1	-0.28	0.633241	1.73601	0.791923	0.442075	0.912744	-5.70184
384	CEP85L	centrosomal protein 85kDa-like	-0.28	0.207819	1.71976	0.843612	0.413559	0.912744	-5.66125
385	HIPK2	homeodomain interacting protein kinase 2	-0.28	0.208704	4.04343	0.535709	0.600859	0.947566	-5.8678
386	SERBP1	SERPINE1 mRNA binding protein 1	-0.28	0.427748	7.54485	1.92563	0.075438	0.792942	-4.36791
387	AKAP12	A kinase (PRKA) anchor protein 12	-0.28	0.223263	3.54155	0.420501	0.680725	0.985843	-5.92248
388	TMEM248	transmembrane protein 248	-0.28	0.447463	6.84641	1.56648	0.14033	0.845133	-4.87755
389	TRAF3	TNF receptor-associated factor 3	-0.28	0.609047	4.21277	1.52505	0.150287	0.845133	-4.93199
390	TNIK	TRAF2 and NCK interacting kinase	-0.28	0.463041	2.88476	0.982533	0.343089	0.896395	-5.54097
391	NPEPPS	aminopeptidase puromycin sensitive	-0.28	0.897739	4.02932	6.35628	2.09024e-05	0.10612	2.85649
392	BAG4	BCL2-associated athanogene 4	-0.28	0.244889	4.25718	0.725776	0.480348	0.912744	-5.75038
393	PPIG	peptidylprolyl isomerase G (cyclophilin G)	-0.28	0.718292	3.85367	1.72772	0.106791	0.845133	-4.65666
394	CAST	calpastatin	-0.28	1.01091	4.70318	5.62226	7.16432e-05	0.114365	1.80429
395	MALSU1	mitochondrial assembly of ribosomal large subunit 1	-0.28	0.343519	4.15482	1.07455	0.301376	0.895489	-5.45268
396	TMEM154	transmembrane protein 154	-0.27	0.353061	1.0132	1.74603	0.103467	0.841496	-4.63071
397	ITGA10	integrin, alpha 10	-0.27	0.314683	5.68037	0.4316	0.672833	0.981847	-5.91777
398	PDCD6IP	programmed cell death 6 interacting protein	-0.27	0.221487	5.2218	1.32482	0.20718	0.859907	-5.18037
399	RELT	RELT tumor necrosis factor receptor	-0.27	0.903521	3.32367	2.43212	0.0295658	0.671946	-3.56105
400	WNT10B	wingless-type MMTV integration site family, member 10B	-0.27	0.788472	3.68026	0.842974	0.413904	0.912744	-5.66177
401	HNRNPA1	heterogeneous nuclear ribonucleoprotein A1	-0.27	0.692576	7.95584	1.78214	0.0971817	0.832835	-4.57908
402	NHLRC2	NHL repeat containing 2	-0.27	0.193189	3.21622	0.839466	0.415801	0.912744	-5.66459
403	AFF4	AF4/FMR2 family, member 4	-0.27	0.579446	4.95831	2.24181	0.0423144	0.719561	-3.87371
404	SLITRK1	SLIT and NTRK-like family, member 1	-0.27	0.362614	0.615546	0.65572	0.523004	0.914539	-5.79752
405	FAT4	FAT atypical cadherin 4	-0.27	0.611066	3.38301	1.7737	0.0986199	0.834738	-4.59121
406	CHORDC1	cysteine and histidine-rich domain (CHORD) containing 1	-0.27	0.610766	3.20878	1.59645	0.133482	0.845133	-4.83755
407	ISM2	isthmin 2	-0.27	0.877146	0.618612	1.92512	0.0755067	0.793	-4.36867
408	EIF4E	eukaryotic translation initiation factor 4E	-0.27	0.273145	3.43394	1.3892	0.187223	0.853818	-5.10328
409	TAF7L	TAF7-like RNA polymerase II, TATA box binding protein (TBP)-associated factor, 50kDa	-0.27	0.213373	0.985075	0.590583	0.564539	0.930039	-5.83733
410	SLC7A1	solute carrier family 7 (cationic amino acid transporter, y+ system), member 1	-0.27	0.883312	4.83253	2.83653	0.0135678	0.572739	-2.87113
411	PTCH1	patched 1	-0.27	0.444384	3.16829	0.932095	0.36763	0.900598	-5.58649
412	FBXO33	F-box protein 33	-0.27	0.269098	3.95499	1.08774	0.295716	0.895489	-5.43947
413	NBEAL1	neurobeachin-like 1	-0.27	0.341304	1.61614	1.08454	0.297081	0.895489	-5.44269
414	POLR3D	polymerase (RNA) III (DNA directed) polypeptide D, 44kDa	-0.27	0.285561	5.02948	0.637215	0.534624	0.918696	-5.80923
415	DDX54	DEAD (Asp-Glu-Ala-Asp) box polypeptide 54	-0.27	0.292771	5.33638	1.07477	0.301278	0.895489	-5.45245
416	DYRK2	dual-specificity tyrosine-(Y)-phosphorylation regulated kinase 2	-0.27	1.0438	4.87337	2.00489	0.0654166	0.778064	-4.24748
417	HCFC2	host cell factor C2	-0.27	0.591247	3.41381	1.84857	0.0864997	0.809663	-4.48247
418	WWP1	WW domain containing E3 ubiquitin protein ligase 1	-0.26	0.39976	5.35102	0.971159	0.348519	0.897673	-5.55142
419	TLCD2	TLC domain containing 2	-0.26	0.456105	2.97987	0.893838	0.387039	0.904078	-5.61962
420	SRP72	signal recognition particle 72kDa	-0.26	0.230742	6.26089	1.41742	0.178985	0.847977	-5.06864
421	RANBP3	RAN binding protein 3	-0.26	0.438051	4.64143	1.73311	0.105804	0.84374	-4.64904
422	SPOCK3	sparc/osteonectin, cwcv and kazal-like domains proteoglycan (testican) 3	-0.26	0.203621	0.227093	0.832696	0.419479	0.912744	-5.67002
423	PBX3	pre-B-cell leukemia homeobox 3	-0.26	0.199769	4.68056	0.736912	0.473767	0.912744	-5.74248
424	SLC12A2	solute carrier family 12 (sodium/potassium/chloride transporter), member 2	-0.26	0.19738	3.6336	0.494291	0.629032	0.960719	-5.88892
425	SAMD4A	sterile alpha motif domain containing 4A	-0.26	1.02953	3.97188	2.8987	0.0120203	0.545104	-2.76294
426	SEMA3D	sema domain, immunoglobulin domain (Ig), short basic domain, secreted, (semaphorin) 3D	-0.26	0.504244	2.79399	0.575982	0.574088	0.935756	-5.84571
427	MMAB	methylmalonic aciduria (cobalamin deficiency) cblB type	-0.26	0.281028	3.17663	1.02393	0.323837	0.895489	-5.50208
428	NUP37	nucleoporin 37kDa	-0.26	0.615294	3.4194	2.63688	0.0199755	0.627218	-3.21521
429	EML6	echinoderm microtubule associated protein like 6	-0.25	0.313538	0.524344	1.72817	0.106708	0.845133	-4.65602
430	SLC23A3	solute carrier family 23, member 3	-0.25	0.219118	0.35623	1.5563	0.142722	0.845133	-4.89101
431	ABTB2	ankyrin repeat and BTB (POZ) domain containing 2	-0.25	0.744555	2.62065	1.31634	0.209933	0.860023	-5.19032
432	CINP	cyclin-dependent kinase 2 interacting protein	-0.25	0.426955	4.50595	1.43402	0.174283	0.847721	-5.04803
433	RAPGEF1	Rap guanine nucleotide exchange factor (GEF) 1	-0.25	0.243135	5.80421	1.04025	0.316466	0.895489	-5.48637
434	CACNB1	calcium channel, voltage-dependent, beta 1 subunit	-0.25	0.825336	3.0938	2.52971	0.0245433	0.646552	-3.39727
435	RSF1	remodeling and spacing factor 1	-0.25	0.592799	3.53324	1.80508	0.093366	0.825298	-4.54595
436	ZNF654	zinc finger protein 654	-0.25	0.797098	3.38773	2.26085	0.0408359	0.714502	-3.84288
437	GDI2	GDP dissociation inhibitor 2	-0.25	0.409335	7.63879	1.39793	0.184643	0.850931	-5.09262
438	KLHDC10	kelch domain containing 10	-0.25	0.550939	4.86871	1.72973	0.106422	0.844659	-4.65382
439	RORA	RAR-related orphan receptor A	-0.25	1.68549	2.33072	3.88347	0.00175754	0.354108	-1.0329
440	MT1A	metallothionein 1A	-0.25	1.51449	2.86541	1.63886	0.124287	0.845133	-4.78011
441	PCM1	pericentriolar material 1	-0.25	0.518838	4.51552	1.99868	0.0661557	0.778064	-4.25701
442	UBL3	ubiquitin-like 3	-0.24	0.298672	4.87183	1.15337	0.268736	0.882262	-5.37184
443	ANKRD34A	ankyrin repeat domain 34A	-0.24	0.195934	2.05136	0.647929	0.527878	0.916199	-5.80249
444	OCRL	oculocerebrorenal syndrome of Lowe	-0.24	0.501758	4.52635	1.79552	0.0949389	0.827279	-4.55978
445	ZNF367	zinc finger protein 367	-0.24	0.674194	3.73953	2.17242	0.0481385	0.73372	-3.98515
446	PDAP1	PDGFA associated protein 1	-0.24	0.432022	6.73981	1.02931	0.32139	0.895489	-5.49692
447	PIP4K2C	phosphatidylinositol-5-phosphate 4-kinase, type II, gamma	-0.24	0.909679	5.07292	1.87727	0.0822191	0.804123	-4.4401
448	AMMECR1	Alport syndrome, mental retardation, midface hypoplasia and elliptocytosis chromosomal region gene 1	-0.24	1.11024	3.5806	3.28146	0.00568454	0.467747	-2.09074
449	TASP1	taspase, threonine aspartase, 1	-0.24	0.53138	2.87288	1.46875	0.164775	0.845133	-5.00435
450	LRRN3	leucine rich repeat neuronal 3	-0.24	1.23386	4.2751	1.73872	0.104784	0.842136	-4.64109
451	GABPA	GA binding protein transcription factor, alpha subunit 60kDa	-0.24	0.447973	4.50195	1.90095	0.0788334	0.799272	-4.40488
452	SRSF10	serine/arginine-rich splicing factor 10	-0.24	0.201574	5.03133	0.934025	0.366669	0.900598	-5.58479
453	SYTL2	synaptotagmin-like 2	-0.24	0.726636	4.00332	1.52848	0.149439	0.845133	-4.92751
454	KPNA5	karyopherin alpha 5 (importin alpha 6)	-0.24	0.226043	1.83316	1.0343	0.319136	0.895489	-5.49211
455	NSF	N-ethylmaleimide-sensitive factor	-0.24	0.267379	5.22687	1.05999	0.307715	0.895489	-5.46709
456	AMOT	angiomotin	-0.24	0.997582	4.48125	2.30237	0.0377795	0.704923	-3.77528
457	ACSL4	acyl-CoA synthetase long-chain family member 4	-0.24	0.3573	4.71226	1.19971	0.25085	0.876114	-5.32215
458	EYA4	eyes absent homolog 4 (Drosophila)	-0.24	0.692189	2.58718	1.3435	0.201219	0.858493	-5.15829
459	CDCA2	cell division cycle associated 2	-0.24	1.43506	3.73104	3.28327	0.00566442	0.467417	-2.08755
460	FGF1	fibroblast growth factor 1 (acidic)	-0.24	0.225405	1.58168	0.431339	0.673018	0.981901	-5.91788
461	DENND4A	DENN/MADD domain containing 4A	-0.24	0.532124	3.30117	1.61349	0.129719	0.845133	-4.81459
462	RGPD4	RANBP2-like and GRIP domain containing 4	-0.24	0.207656	0.38636	1.345	0.200747	0.858493	-5.1565
463	A4GNT	alpha-1,4-N-acetylglucosaminyltransferase	-0.23	0.285637	0.286865	2.40221	0.0312924	0.681272	-3.6108
464	GCC2	GRIP and coiled-coil domain containing 2	-0.23	0.439501	2.91316	1.16272	0.26505	0.880423	-5.36194
465	FAT3	FAT atypical cadherin 3	-0.23	0.669159	4.26246	1.00499	0.332547	0.895489	-5.52004
466	CAPN6	calpain 6	-0.23	2.51658	1.83823	2.68332	0.0182629	0.613092	-3.1357
467	AGAP2-AS1	AGAP2 antisense RNA 1	-0.23	1.73271	1.72813	2.97008	0.0104572	0.540824	-2.63827
468	GPC6	glypican 6	-0.23	0.742467	3.3061	0.71293	0.488009	0.912744	-5.75935
469	ACOX1	acyl-CoA oxidase 1, palmitoyl	-0.23	0.281381	4.82978	1.42104	0.17795	0.847977	-5.06415
470	FSTL1	follistatin-like 1	-0.23	0.246874	8.00045	0.41041	0.687933	0.989528	-5.92666
471	SCUBE3	signal peptide, CUB domain, EGF-like 3	-0.23	1.2639	4.29951	1.19747	0.251691	0.876384	-5.32458
472	NAPEPLD	N-acyl phosphatidylethanolamine phospholipase D	-0.23	0.271478	3.15026	0.920598	0.373391	0.901075	-5.59658
473	SOX6	SRY (sex determining region Y)-box 6	-0.23	0.987937	2.17867	1.56513	0.140644	0.845133	-4.87933
474	TIPIN	TIMELESS interacting protein	-0.23	0.45404	3.48546	1.35076	0.19894	0.858493	-5.14964
475	TXNDC17	thioredoxin domain containing 17	-0.23	0.251294	4.27524	0.848984	0.410667	0.912744	-5.6569
476	DCAF10	DDB1 and CUL4 associated factor 10	-0.23	0.563285	4.24936	1.62389	0.127468	0.845133	-4.8005
477	CSDE1	cold shock domain containing E1, RNA-binding	-0.22	0.209062	8.32486	0.852473	0.408795	0.912744	-5.65406
478	SIK1	salt-inducible kinase 1	-0.22	1.14507	1.52202	1.6697	0.117951	0.845133	-4.73773
479	EIF3A	eukaryotic translation initiation factor 3, subunit A	-0.22	0.401712	6.30564	1.03623	0.318267	0.895489	-5.49025
480	MNT	MNT, MAX dimerization protein	-0.22	0.253191	3.66012	1.19619	0.252172	0.876492	-5.32597
481	XPO4	exportin 4	-0.22	0.378655	3.31025	1.60896	0.130711	0.845133	-4.82071
482	UQCC1	ubiquinol-cytochrome c reductase complex assembly factor 1	-0.22	0.234573	4.02178	0.690107	0.501799	0.912744	-5.77493
483	KRAS	Kirsten rat sarcoma viral oncogene homolog	-0.22	0.255852	4.5355	0.60695	0.553938	0.925111	-5.82769
484	FNIP2	folliculin interacting protein 2	-0.22	0.618741	3.81409	2.3764	0.0328596	0.687941	-3.65356
485	AVEN	apoptosis, caspase activation inhibitor	-0.22	0.484065	3.24719	1.67086	0.117718	0.845133	-4.73613
486	OGT	O-linked N-acetylglucosamine (GlcNAc) transferase	-0.22	0.987294	5.4748	2.80268	0.014491	0.582704	-2.92985
487	EPC1	enhancer of polycomb homolog 1 (Drosophila)	-0.22	0.206537	2.86897	0.612739	0.550214	0.924122	-5.82423
488	LMO7	LIM domain 7	-0.21	0.380312	4.52423	1.23456	0.238017	0.872004	-5.28376
489	ETV3	ets variant 3	-0.21	0.575504	4.62166	2.53347	0.0243673	0.645186	-3.39093
490	BEST4	bestrophin 4	-0.21	1.18505	1.19366	3.63732	0.00283459	0.416206	-1.46364
491	ASB7	ankyrin repeat and SOCS box containing 7	-0.21	0.435784	3.2064	1.47637	0.162748	0.845133	-4.99467
492	MSL1	male-specific lethal 1 homolog (Drosophila)	-0.21	0.325293	5.57751	1.83077	0.0892525	0.815759	-4.50855
493	SPOCD1	SPOC domain containing 1	-0.21	0.381022	3.34368	0.57611	0.574004	0.935756	-5.84564
494	BHLHE41	basic helix-loop-helix family, member e41	-0.21	1.88917	4.3694	3.75638	0.00224844	0.389924	-1.25481
495	EXOC5	exocyst complex component 5	-0.21	0.522946	4.24137	2.57716	0.0224085	0.640866	-3.31693
496	LONRF3	LON peptidase N-terminal domain and ring finger 3	-0.21	0.362316	1.54513	1.10264	0.289419	0.895489	-5.4244
497	CYLD	cylindromatosis (turban tumor syndrome)	-0.21	0.328696	3.52472	0.816287	0.42848	0.912744	-5.683
498	SUZ12	SUZ12 polycomb repressive complex 2 subunit	-0.21	0.573571	4.58968	1.81369	0.0919694	0.821995	-4.53345
499	PHF21A	PHD finger protein 21A	-0.21	0.678805	3.86846	2.47549	0.0272224	0.660342	-3.48851
500	TPT1	tumor protein, translationally-controlled 1	-0.21	0.209569	7.63915	0.729728	0.478006	0.912744	-5.74759

## Sheet: Table 2B
	gene_name	Gene.name	Total.context...score	logFC	AveExpr	t	P.Value	adj.P.Val	B
1	ZNF138	zinc finger protein 138	-0.91	0.351087	3.05608	0.866276	0.401447	0.910574	-5.64273
2	OXSM	3-oxoacyl-ACP synthase, mitochondrial	-0.88	0.364969	3.50699	1.35972	0.196158	0.857971	-5.13892
3	HMGB1	high mobility group box 1	-0.84	0.282233	6.39403	0.925612	0.370871	0.901075	-5.59219
4	RRM2B	ribonucleotide reductase M2 B (TP53 inducible)	-0.72	0.514021	4.43343	1.54261	0.145994	0.845133	-4.90903
5	TDRP	testis development related protein	-0.66	0.555643	3.16948	0.93223	0.367562	0.900598	-5.58637
6	RPAIN	RPA interacting protein	-0.62	0.304812	2.45618	1.01212	0.329247	0.895489	-5.51331
7	PRSS23	protease, serine, 23	-0.6	0.478273	4.82491	0.904082	0.381774	0.903285	-5.61087
8	ZNRF2	zinc and ring finger 2	-0.59	0.334196	3.26704	1.1695	0.262401	0.879019	-5.35472
9	EXOSC8	exosome component 8	-0.59	0.649186	3.75879	2.55387	0.0234328	0.644274	-3.35641
10	ORMDL2	ORM1-like 2 (S. cerevisiae)	-0.59	0.34873	2.89841	0.7224	0.482355	0.912744	-5.75275
11	STAU1	staufen double-stranded RNA binding protein 1	-0.58	0.397186	6.74819	1.34427	0.200976	0.858493	-5.15737
12	C6orf141	chromosome 6 open reading frame 141	-0.58	0.467032	0.525259	1.18041	0.258181	0.877604	-5.34303
13	PARP8	poly (ADP-ribose) polymerase family, member 8	-0.57	0.538066	2.31851	1.22054	0.243116	0.873421	-5.29931
14	RAB23	RAB23, member RAS oncogene family	-0.57	0.526219	4.02474	1.23374	0.23831	0.872004	-5.28467
15	VCPKMT	valosin containing protein lysine (K) methyltransferase	-0.57	0.777552	4.09214	2.46144	0.0279615	0.666462	-3.51206
16	OSR2	odd-skipped related 2 (Drosophila)	-0.57	0.768397	3.05547	1.16812	0.26294	0.87929	-5.35619
17	SUMO4	small ubiquitin-like modifier 4	-0.56	0.272188	0.949676	1.02253	0.324474	0.895489	-5.50341
18	TRIQK	triple QxxK/R motif containing	-0.56	0.559543	3.91481	2.88349	0.0123822	0.553911	-2.78945
19	PPIL4	peptidylprolyl isomerase (cyclophilin)-like 4	-0.55	0.604495	4.89334	1.59661	0.133447	0.845133	-4.83734
20	SESN3	sestrin 3	-0.55	0.433366	4.96819	1.21913	0.243632	0.873421	-5.30086
21	CFL2	cofilin 2 (muscle)	-0.55	0.298846	5.45384	1.00072	0.334532	0.895656	-5.52405
22	PSMA4	proteasome (prosome, macropain) subunit, alpha type, 4	-0.55	0.519166	5.62476	1.29086	0.218383	0.861791	-5.21993
23	PHYKPL	5-phosphohydroxy-L-lysine phospho-lyase	-0.55	0.411525	3.42099	1.02279	0.324357	0.895489	-5.50317
24	RNF6	ring finger protein (C3H2C3 type) 6	-0.54	0.548061	4.04171	1.57607	0.138106	0.845133	-4.86481
25	UQCRB	ubiquinol-cytochrome c reductase binding protein	-0.54	0.612049	4.03166	2.40994	0.0308371	0.6774	-3.59796
26	MFAP4	microfibrillar-associated protein 4	-0.54	0.77181	4.18749	0.491441	0.630994	0.961698	-5.89031
27	ZNF195	zinc finger protein 195	-0.53	0.24755	2.51555	0.786208	0.445303	0.912744	-5.70619
28	COX5A	cytochrome c oxidase subunit Va	-0.51	0.383236	7.4208	1.37112	0.192661	0.85655	-5.1252
29	AIMP1	aminoacyl tRNA synthetase complex-interacting multifunctional protein 1	-0.51	0.633978	4.01788	3.42619	0.0042816	0.443458	-1.83544
30	GPN1	GPN-loop GTPase 1	-0.51	0.258183	4.43889	1.19948	0.250933	0.876114	-5.32239
31	SS18L2	synovial sarcoma translocation gene on chromosome 18-like 2	-0.51	0.288022	3.27161	1.3088	0.212406	0.860466	-5.19913
32	BET1	Bet1 golgi vesicular membrane trafficking protein	-0.5	0.323451	3.93863	0.824442	0.423991	0.912744	-5.67658
33	TSFM	Ts translation elongation factor, mitochondrial	-0.5	0.684769	0.867077	2.18865	0.0467125	0.728574	-3.95922
34	GALK2	galactokinase 2	-0.49	0.350571	2.40798	1.33934	0.202534	0.858493	-5.16322
35	TMEM67	transmembrane protein 67	-0.49	0.552044	2.34127	1.36327	0.195063	0.857586	-5.13466
36	AGO2	argonaute RISC catalytic component 2	-0.49	0.309944	4.41284	1.19869	0.251233	0.876384	-5.32326
37	EIF2B1	eukaryotic translation initiation factor 2B, subunit 1 alpha, 26kDa	-0.49	0.271042	5.7105	0.952197	0.357706	0.899319	-5.5686
38	MMP27	matrix metallopeptidase 27	-0.48	0.285807	0.147375	1.33247	0.204724	0.858545	-5.17136
39	IL26	interleukin 26	-0.47	0.959947	0.963855	1.13443	0.276324	0.887485	-5.39169
40	PRR16	proline rich 16	-0.47	0.387192	3.10777	0.449127	0.660453	0.97546	-5.91008
41	C11orf54	chromosome 11 open reading frame 54	-0.47	0.361169	2.50074	1.42444	0.176985	0.847977	-5.05995
42	FBXO33	F-box protein 33	-0.47	0.269098	3.95499	1.08774	0.295716	0.895489	-5.43947
43	SLITRK4	SLIT and NTRK-like family, member 4	-0.46	0.503485	1.31858	1.06645	0.304887	0.895489	-5.46071
44	GUCY1A2	guanylate cyclase 1, soluble, alpha 2	-0.46	0.554342	2.2107	1.08572	0.296578	0.895489	-5.44151
45	VAPA	VAMP (vesicle-associated membrane protein)-associated protein A, 33kDa	-0.46	0.508417	5.29999	1.59657	0.133455	0.845133	-4.83739
46	CISD1	CDGSH iron sulfur domain 1	-0.45	0.582987	4.12111	1.67974	0.11595	0.845133	-4.72383
47	PAFAH1B2	platelet-activating factor acetylhydrolase 1b, catalytic subunit 2 (30kDa)	-0.45	0.369852	5.56597	1.40888	0.181447	0.849602	-5.07918
48	SAP18	Sin3A-associated protein, 18kDa	-0.45	0.461652	5.97908	1.83019	0.089344	0.81596	-4.5094
49	MRPS18C	mitochondrial ribosomal protein S18C	-0.44	0.417893	1.76963	1.77431	0.0985146	0.834567	-4.59033
50	IL23A	interleukin 23, alpha subunit p19	-0.43	0.705746	1.42498	2.33642	0.0354354	0.694062	-3.71947
51	METTL23	methyltransferase like 23	-0.43	0.257558	4.06222	1.47813	0.162281	0.845133	-4.99242
52	FAM114A1	family with sequence similarity 114, member A1	-0.43	0.524837	6.18887	1.26028	0.228881	0.866275	-5.25487
53	CORT	cortistatin	-0.43	0.394198	1.87195	0.635171	0.535916	0.918999	-5.8105
54	CCDC112	coiled-coil domain containing 112	-0.42	0.880218	2.44581	2.86576	0.0128172	0.559043	-2.82031
55	SCNN1B	sodium channel, non-voltage-gated 1, beta subunit	-0.42	0.714144	0.40835	1.24716	0.233505	0.869046	-5.26966
56	COPS8	COP9 signalosome subunit 8	-0.42	0.398276	5.86921	0.678329	0.509004	0.912744	-5.78279
57	CTXN3	cortexin 3	-0.41	0.329384	0.294875	1.29272	0.217758	0.861751	-5.21779
58	SPOCK1	sparc/osteonectin, cwcv and kazal-like domains proteoglycan (testican) 1	-0.41	0.90306	4.77795	0.996242	0.336625	0.895712	-5.52824
59	GOLGA6L9	golgin A6 family-like 9	-0.41	0.42285	1.5935	1.02447	0.323588	0.895489	-5.50155
60	NUDT15	nudix (nucleoside diphosphate linked moiety X)-type motif 15	-0.4	0.640589	4.35125	2.5782	0.0223638	0.640866	-3.31516
61	PMPCB	peptidase (mitochondrial processing) beta	-0.4	0.400795	4.47534	1.83719	0.0882511	0.813588	-4.49916
62	PLRG1	pleiotropic regulator 1	-0.4	0.336923	4.95482	1.70259	0.111505	0.845133	-4.69198
63	TMEM237	transmembrane protein 237	-0.39	0.332	3.67287	0.583663	0.569054	0.932916	-5.84133
64	FAM89A	family with sequence similarity 89, member A	-0.39	0.661414	3.47102	1.13848	0.274685	0.887147	-5.38746
65	FUT8	fucosyltransferase 8 (alpha (1,6) fucosyltransferase)	-0.39	0.6535	4.26986	1.62094	0.128103	0.845133	-4.8045
66	SUV39H2	suppressor of variegation 3-9 homolog 2 (Drosophila)	-0.39	0.241293	3.74869	0.911878	0.377801	0.902317	-5.60415
67	CDADC1	cytidine and dCMP deaminase domain containing 1	-0.38	0.69006	2.56181	2.58318	0.0221507	0.640866	-3.3067
68	CCNG2	cyclin G2	-0.38	0.697291	4.18424	2.21839	0.0442014	0.723762	-3.91148
69	GALNT5	UDP-N-acetyl-alpha-D-galactosamine:polypeptide N-acetylgalactosaminyltransferase 5 (GalNAc-T5)	-0.38	0.688184	3.69399	0.789971	0.443176	0.912744	-5.70333
70	GLMN	glomulin, FKBP associated protein	-0.38	0.604962	3.70291	2.36416	0.0336289	0.689864	-3.67379
71	IMMP2L	IMP2 inner mitochondrial membrane peptidase-like (S. cerevisiae)	-0.38	0.547386	2.22193	1.9472	0.0725813	0.78776	-4.33539
72	CHN1	chimerin 1	-0.38	0.562282	4.31091	0.862204	0.403605	0.911707	-5.64609
73	DNAJC2	DnaJ (Hsp40) homolog, subfamily C, member 2	-0.37	0.945824	3.64347	3.19266	0.00676482	0.493214	-2.24729
74	GOLGA6L9	Homo sapiens golgin subfamily A member 6-like protein 9-like (LOC101927658), mRNA.	-0.37	0.42285	1.5935	1.02447	0.323588	0.895489	-5.50155
75	MRPL40	mitochondrial ribosomal protein L40	-0.37	0.400792	5.25348	1.18334	0.257058	0.877006	-5.33988
76	C11orf87	chromosome 11 open reading frame 87	-0.37	0.354388	0.575216	0.963987	0.351974	0.898482	-5.55795
77	PTX3	pentraxin 3, long	-0.37	0.285401	5.48841	0.325942	0.749457	1	-5.95776
78	TCFL5	transcription factor-like 5 (basic helix-loop-helix)	-0.37	0.404499	4.15592	1.36313	0.195106	0.85762	-5.13483
79	SFXN1	sideroflexin 1	-0.37	0.573496	4.49401	2.42508	0.0299637	0.673574	-3.57277
80	UQCC2	ubiquinol-cytochrome c reductase complex assembly factor 2	-0.37	0.321493	4.3106	1.40482	0.182625	0.850783	-5.08416
81	PLEKHA2	pleckstrin homology domain containing, family A (phosphoinositide binding specific) member 2	-0.37	0.640455	4.84226	1.91997	0.076205	0.794131	-4.37641
82	PDIA4	protein disulfide isomerase family A, member 4	-0.36	0.648404	8.31887	1.41182	0.180597	0.849287	-5.07556
83	TTC13	tetratricopeptide repeat domain 13	-0.36	0.349939	3.77562	1.37195	0.19241	0.855941	-5.12421
84	CA13	carbonic anhydrase XIII	-0.36	0.714799	1.74898	1.77152	0.0989933	0.83544	-4.59433
85	PRRC1	proline-rich coiled-coil 1	-0.36	0.385449	5.1762	1.23535	0.237732	0.872004	-5.28288
86	FAM110B	family with sequence similarity 110, member B	-0.36	0.774667	4.60429	1.93152	0.0746481	0.791656	-4.35905
87	TMED7	transmembrane emp24 protein transport domain containing 7	-0.36	0.36944	6.10732	1.08121	0.298509	0.895489	-5.44603
88	GOLM1	golgi membrane protein 1	-0.35	0.681777	6.95532	1.5741	0.13856	0.845133	-4.86742
89	UBE2N	ubiquitin-conjugating enzyme E2N	-0.35	0.257454	5.24434	1.66466	0.118966	0.845133	-4.74469
90	SH2D4A	SH2 domain containing 4A	-0.35	0.720158	3.10707	1.76938	0.0993631	0.836042	-4.5974
91	MYCBP2	MYC binding protein 2, E3 ubiquitin protein ligase	-0.35	0.501049	3.47336	1.42694	0.176277	0.847977	-5.05685
92	DNAJC3	DnaJ (Hsp40) homolog, subfamily C, member 3	-0.35	0.517829	5.81347	1.43096	0.175143	0.847721	-5.05185
93	DCAF17	DDB1 and CUL4 associated factor 17	-0.35	0.263578	3.15281	0.788646	0.443924	0.912744	-5.70434
94	RAD18	RAD18 homolog (S. cerevisiae)	-0.34	0.248322	3.05831	1.00768	0.331299	0.895489	-5.51751
95	EIF5B	eukaryotic translation initiation factor 5B	-0.34	0.700498	6.06167	1.35817	0.196637	0.857971	-5.14078
96	MAP3K15	mitogen-activated protein kinase kinase kinase 15	-0.34	0.371545	0.488658	1.45794	0.167686	0.845577	-5.01802
97	RRAGD	Ras-related GTP binding D	-0.34	0.539869	4.25231	1.29601	0.216654	0.860963	-5.21398
98	CCNB1	cyclin B1	-0.34	0.794168	6.2107	2.09054	0.0559716	0.757758	-4.11461
99	SPAG7	sperm associated antigen 7	-0.33	0.774173	5.01992	2.67661	0.0185012	0.614276	-3.14721
100	COMMD10	COMM domain containing 10	-0.33	0.499747	4.11931	1.50643	0.154954	0.845133	-4.95613
101	PDE7B	phosphodiesterase 7B	-0.33	0.266603	2.83495	0.66191	0.519149	0.913914	-5.79353
102	SEMA3D	sema domain, immunoglobulin domain (Ig), short basic domain, secreted, (semaphorin) 3D	-0.33	0.504244	2.79399	0.575982	0.574088	0.935756	-5.84571
103	YIPF5	Yip1 domain family, member 5	-0.33	0.497558	6.14997	1.56976	0.139565	0.845133	-4.87319
104	IFRD1	interferon-related developmental regulator 1	-0.33	0.634433	2.05845	1.94432	0.0729564	0.78776	-4.33974
105	TTC14	tetratricopeptide repeat domain 14	-0.32	0.33994	2.91756	1.21832	0.24393	0.873421	-5.30176
106	ANP32E	acidic (leucine-rich) nuclear phosphoprotein 32 family, member E	-0.32	0.366917	6.20084	0.764172	0.457891	0.912744	-5.72268
107	METTL14	methyltransferase like 14	-0.32	0.388583	3.49382	1.55525	0.142972	0.845133	-4.8924
108	SLC25A46	solute carrier family 25, member 46	-0.32	0.503901	4.1367	2.22333	0.0437967	0.723762	-3.90352
109	PDK1	pyruvate dehydrogenase kinase, isozyme 1	-0.32	1.92171	2.86558	4.84697	0.000285179	0.182921	0.593768
110	LOX	lysyl oxidase	-0.32	1.49646	7.69104	2.66797	0.0188127	0.616852	-3.16202
111	NDFIP1	Nedd4 family interacting protein 1	-0.32	0.359822	6.13361	1.35324	0.198167	0.858493	-5.14668
112	RASEF	RAS and EF-hand domain containing	-0.31	0.693243	0.383943	2.1961	0.0460713	0.727593	-3.94729
113	ZRANB3	zinc finger, RAN-binding domain containing 3	-0.31	0.307581	1.97678	0.976248	0.346082	0.897019	-5.54676
114	RNF128	ring finger protein 128, E3 ubiquitin protein ligase	-0.31	1.00119	1.72817	1.58583	0.135875	0.845133	-4.85178
115	PHF10	PHD finger protein 10	-0.31	0.312845	4.98823	1.06557	0.305271	0.895489	-5.46158
116	ARHGAP42	Rho GTPase activating protein 42	-0.31	0.560912	3.43176	1.80065	0.0940919	0.826239	-4.55236
117	MTDH	metadherin	-0.31	0.632149	6.96898	2.25455	0.0413194	0.715307	-3.85309
118	LIPT2	lipoyl(octanoyl) transferase 2 (putative)	-0.31	0.358701	1.21522	1.48152	0.16139	0.845133	-4.98811
119	ZDHHC17	zinc finger, DHHC-type containing 17	-0.31	0.599642	3.40446	3.25139	0.00602953	0.476693	-2.14377
120	RPL37A	ribosomal protein L37a	-0.31	0.747702	7.65301	1.6305	0.126055	0.845133	-4.79151
121	SNX24	sorting nexin 24	-0.31	0.636358	3.65156	2.38242	0.0324876	0.68546	-3.64361
122	SCAI	suppressor of cancer cell invasion	-0.31	0.460648	2.22231	2.2134	0.044614	0.725258	-3.91952
123	SLC25A16	solute carrier family 25 (mitochondrial carrier; Graves disease autoantigen), member 16	-0.31	0.268013	2.99282	0.909245	0.37914	0.902712	-5.60643
124	MARK3	MAP/microtubule affinity-regulating kinase 3	-0.31	1.03021	4.00421	2.14449	0.0506879	0.744809	-4.02956
125	REEP5	receptor accessory protein 5	-0.31	0.277085	6.03985	2.16014	0.0492439	0.739024	-4.0047
126	USP15	ubiquitin specific peptidase 15	-0.31	0.388778	2.77711	2.00864	0.0649745	0.777688	-4.24172
127	NDUFB9	NADH dehydrogenase (ubiquinone) 1 beta subcomplex, 9, 22kDa	-0.31	0.397622	3.30623	1.43551	0.173866	0.847721	-5.04617
128	CLDN11	claudin 11	-0.3	0.241831	1.14511	0.438083	0.668242	0.979273	-5.91496
129	RNPC3	RNA-binding region (RNP1, RRM) containing 3	-0.3	0.275468	2.15191	0.98097	0.343831	0.896556	-5.54241
130	HELLS	helicase, lymphoid-specific	-0.3	0.317011	3.00687	0.925007	0.371174	0.901075	-5.59272
131	SNAPC3	small nuclear RNA activating complex, polypeptide 3, 50kDa	-0.3	0.468806	4.30051	1.69391	0.113175	0.845133	-4.70411
132	KTN1	kinectin 1 (kinesin receptor)	-0.3	0.773757	4.89442	2.86003	0.0129613	0.560926	-2.83029
133	OLR1	oxidized low density lipoprotein (lectin-like) receptor 1	-0.3	0.738312	1.781	1.56924	0.139686	0.845133	-4.87388
134	SNTB1	syntrophin, beta 1 (dystrophin-associated protein A1, 59kDa, basic component 1)	-0.3	1.27507	3.63633	2.7561	0.0158625	0.595506	-3.01041
135	RNF41	ring finger protein 41	-0.3	0.34488	4.4976	1.61665	0.129031	0.845133	-4.81031
136	COX17	COX17 cytochrome c oxidase copper chaperone	-0.3	0.270889	4.15297	0.726545	0.479892	0.912744	-5.74984
137	EIF3M	eukaryotic translation initiation factor 3, subunit M	-0.3	0.28938	4.92585	0.992256	0.338495	0.895752	-5.53196
138	CPSF2	cleavage and polyadenylation specific factor 2, 100kDa	-0.3	0.260543	4.12625	0.908905	0.379313	0.902712	-5.60672
139	C1GALT1C1	C1GALT1-specific chaperone 1	-0.3	0.286677	4.91533	0.821424	0.425649	0.912744	-5.67896
140	INTS8	integrator complex subunit 8	-0.3	0.306831	4.32095	1.07581	0.300831	0.895489	-5.45142
141	EIF4E	eukaryotic translation initiation factor 4E	-0.3	0.273145	3.43394	1.3892	0.187223	0.853818	-5.10328
142	CYB5R4	cytochrome b5 reductase 4	-0.3	0.26277	2.18396	1.20163	0.250127	0.876067	-5.32005
143	MRGBP	MRG/MORF4L binding protein	-0.3	0.92083	4.90504	2.82695	0.0138231	0.574337	-2.88776
144	BRIP1	BRCA1 interacting protein C-terminal helicase 1	-0.3	0.413878	2.35626	1.60099	0.13247	0.845133	-4.83145
145	TAF9B	TAF9B RNA polymerase II, TATA box binding protein (TBP)-associated factor, 31kDa	-0.29	0.535791	5.17343	1.48421	0.160684	0.845133	-4.98467
146	TMEM161B	transmembrane protein 161B	-0.29	0.708259	2.14017	3.11626	0.00785669	0.513528	-2.38178
147	FHAD1	forkhead-associated (FHA) phosphopeptide binding domain 1	-0.29	0.555575	1.5356	1.38874	0.187359	0.853818	-5.10384
148	THAP5	THAP domain containing 5	-0.29	0.539344	3.76072	1.74388	0.103852	0.841496	-4.63377
149	IBTK	inhibitor of Bruton agammaglobulinemia tyrosine kinase	-0.29	0.4046	4.51658	1.1363	0.275568	0.887485	-5.38974
150	ZBTB21	zinc finger and BTB domain containing 21	-0.29	0.704639	3.1679	2.15777	0.0494604	0.739423	-4.00848
151	IMPA1	inositol(myo)-1(or 4)-monophosphatase 1	-0.29	0.515407	4.0557	1.44332	0.171693	0.847592	-5.03641
152	FABP5	fatty acid binding protein 5 (psoriasis-associated)	-0.29	1.25202	5.5191	2.07385	0.0577068	0.761823	-4.14071
153	NAPEPLD	N-acyl phosphatidylethanolamine phospholipase D	-0.29	0.271478	3.15026	0.920598	0.373391	0.901075	-5.59658
154	BAG4	BCL2-associated athanogene 4	-0.29	0.244889	4.25718	0.725776	0.480348	0.912744	-5.75038
155	IARS2	isoleucyl-tRNA synthetase 2, mitochondrial	-0.29	0.524843	6.12744	1.43823	0.173107	0.847721	-5.04278
156	INTS6	integrator complex subunit 6	-0.29	0.424648	2.36556	2.48052	0.0269627	0.6595	-3.48008
157	SMIM6	small integral membrane protein 6	-0.28	0.412406	0.558643	1.93119	0.0746918	0.791656	-4.35954
158	L2HGDH	L-2-hydroxyglutarate dehydrogenase	-0.28	0.998369	2.61104	3.69414	0.00253763	0.406549	-1.36387
159	CD109	CD109 molecule	-0.28	0.884735	5.75855	1.68033	0.115833	0.845133	-4.72301
160	ANGPTL3	angiopoietin-like 3	-0.28	0.435353	0.316162	2.30582	0.0375351	0.702415	-3.76963
161	TCEA3	transcription elongation factor A (SII), 3	-0.28	0.599177	5.69682	1.25853	0.229495	0.866534	-5.25686
162	GOLGA7	golgin A7	-0.28	0.37825	4.31674	0.762662	0.458762	0.912744	-5.72379
163	SLC25A26	solute carrier family 25 (S-adenosylmethionine carrier), member 26	-0.28	0.48181	2.70556	2.07345	0.0577488	0.761862	-4.14133
164	VAMP4	vesicle-associated membrane protein 4	-0.28	0.562121	3.9417	2.5797	0.0222992	0.640866	-3.31261
165	HDAC8	histone deacetylase 8	-0.27	0.357929	1.0519	2.18348	0.047162	0.729358	-3.96748
166	IL6ST	interleukin 6 signal transducer (gp130, oncostatin M receptor)	-0.27	0.392131	5.629	1.6419	0.123651	0.845133	-4.77596
167	ICAM1	intercellular adhesion molecule 1	-0.27	0.862854	4.72579	1.24933	0.232735	0.868516	-5.26723
168	GOLGA8B	golgin A8 family, member B	-0.27	0.430652	1.59581	0.755377	0.462976	0.912744	-5.72914
169	PAFAH1B1	platelet-activating factor acetylhydrolase 1b, regulatory subunit 1 (45kDa)	-0.27	0.707955	4.7682	3.45146	0.00407501	0.439582	-1.79087
170	TOPORS	topoisomerase I binding, arginine/serine-rich, E3 ubiquitin protein ligase	-0.27	0.245827	4.17395	0.752204	0.46482	0.912744	-5.73145
171	NCKAP1	NCK-associated protein 1	-0.27	0.256946	4.46963	0.695873	0.498293	0.912744	-5.77104
172	ZNF268	zinc finger protein 268	-0.27	0.300554	2.35874	1.02086	0.325235	0.895489	-5.505
173	STK17B	serine/threonine kinase 17b	-0.27	0.391067	4.84571	0.865597	0.401806	0.910585	-5.64329
174	STXBP6	syntaxin binding protein 6 (amisyn)	-0.27	0.42016	3.02314	0.834985	0.418233	0.912744	-5.66819
175	PPFIA1	protein tyrosine phosphatase, receptor type, f polypeptide (PTPRF), interacting protein (liprin), alpha 1	-0.27	0.585725	3.64127	2.32975	0.0358832	0.69674	-3.73042
176	PLGRKT	plasminogen receptor, C-terminal lysine transmembrane protein	-0.27	0.251687	4.13718	0.576563	0.573706	0.935756	-5.84538
177	SDC4	syndecan 4	-0.26	0.612503	7.09421	1.1354	0.275931	0.887485	-5.39068
178	URI1	URI1, prefoldin-like chaperone	-0.26	0.256684	5.56327	0.499935	0.625156	0.959256	-5.88614
179	TMED9	transmembrane emp24 protein transport domain containing 9	-0.26	0.739882	7.6677	1.91975	0.0762354	0.794131	-4.37675
180	ZNF664	zinc finger protein 664	-0.26	0.74486	5.93124	1.82448	0.0902444	0.817727	-4.51774
181	MAN2A1	mannosidase, alpha, class 2A, member 1	-0.26	0.991248	4.09359	2.34359	0.03496	0.693202	-3.70769
182	MFF	mitochondrial fission factor	-0.26	0.310348	4.4504	0.989399	0.33984	0.895752	-5.53462
183	YTHDF1	YTH domain family, member 1	-0.26	0.3237	6.33214	0.934963	0.366202	0.900598	-5.58396
184	P4HA1	prolyl 4-hydroxylase, alpha polypeptide I	-0.26	1.72137	7.68323	3.8434	0.00189924	0.365945	-1.10273
185	UBL3	ubiquitin-like 3	-0.26	0.298672	4.87183	1.15337	0.268736	0.882262	-5.37184
186	TIPIN	TIMELESS interacting protein	-0.26	0.45404	3.48546	1.35076	0.19894	0.858493	-5.14964
187	CCDC138	coiled-coil domain containing 138	-0.26	0.41664	2.27764	1.5082	0.154506	0.845133	-4.95385
188	TXNRD3	thioredoxin reductase 3	-0.26	0.269174	3.14516	0.555925	0.587342	0.940391	-5.8569
189	TUBD1	tubulin, delta 1	-0.26	0.327172	3.75208	1.35952	0.196219	0.857971	-5.13916
190	PNRC1	proline-rich nuclear receptor coactivator 1	-0.25	0.341012	6.40391	1.17605	0.259864	0.878184	-5.34772
191	LRRC2	leucine rich repeat containing 2	-0.25	0.930202	1.17744	1.50149	0.156213	0.845133	-4.9625
192	MATR3	matrin 3	-0.25	0.522409	1.17371	1.68604	0.114708	0.845133	-4.71507
193	BRCC3	BRCA1/BRCA2-containing complex, subunit 3	-0.25	0.353713	4.60601	0.792797	0.441583	0.912744	-5.70118
194	RECQL	RecQ protein-like (DNA helicase Q1-like)	-0.25	0.83998	4.57057	2.02391	0.063201	0.775191	-4.21822
195	MPHOSPH6	M-phase phosphoprotein 6	-0.25	0.404623	4.01029	0.941944	0.362744	0.900589	-5.57777
196	ZNF107	zinc finger protein 107	-0.25	0.501885	2.60408	1.53951	0.146744	0.845133	-4.91309
197	EHBP1	EH domain binding protein 1	-0.25	0.553027	4.17843	1.78304	0.097029	0.832147	-4.57778
198	SEC61B	Sec61 beta subunit	-0.25	0.502509	7.89587	2.31257	0.0370619	0.701281	-3.75858
199	ARL5B	ADP-ribosylation factor-like 5B	-0.25	0.282451	4.18286	0.625208	0.542241	0.921309	-5.81665
200	HNRNPC	heterogeneous nuclear ribonucleoprotein C (C1/C2)	-0.25	0.561822	7.47285	2.12583	0.0524598	0.748216	-4.05908
201	ABCB7	ATP-binding cassette, sub-family B (MDR/TAP), member 7	-0.25	0.361785	3.98719	2.3618	0.0337791	0.69	-3.67769
202	RBM8A	RNA binding motif protein 8A	-0.24	0.241172	4.75141	0.916623	0.375396	0.901915	-5.60004
203	GJB3	gap junction protein, beta 3, 31kDa	-0.24	0.270323	0.180887	1.33744	0.203139	0.858493	-5.16548
204	MMP20	matrix metallopeptidase 20	-0.24	0.709851	0.744815	1.35325	0.198166	0.858493	-5.14667
205	DUSP5	dual specificity phosphatase 5	-0.24	0.247214	4.44297	0.501851	0.623843	0.958841	-5.88519
206	KLHL8	kelch-like family member 8	-0.24	0.506332	4.15813	1.9369	0.0739326	0.79107	-4.35094
207	ZNF682	zinc finger protein 682	-0.24	0.757095	1.7615	2.51438	0.0252739	0.65128	-3.42313
208	ARFGEF2	ADP-ribosylation factor guanine nucleotide-exchange factor 2 (brefeldin A-inhibited)	-0.24	0.491047	4.45399	1.28508	0.220336	0.863256	-5.22658
209	MED4	mediator complex subunit 4	-0.24	0.550898	4.37594	2.02917	0.0625998	0.775191	-4.21009
210	DGKE	diacylglycerol kinase, epsilon 64kDa	-0.24	0.406537	1.65299	1.05212	0.31118	0.895489	-5.47481
211	EXOC5	exocyst complex component 5	-0.24	0.522946	4.24137	2.57716	0.0224085	0.640866	-3.31693
212	ANO1	anoctamin 1, calcium activated chloride channel	-0.24	0.253033	3.34885	0.493474	0.629595	0.960801	-5.88932
213	SLC38A1	solute carrier family 38, member 1	-0.24	1.74107	3.79398	2.65956	0.0191205	0.620571	-3.17642
214	UCK2	uridine-cytidine kinase 2	-0.24	0.514943	3.97751	1.58263	0.136602	0.845133	-4.85605
215	THAP1	THAP domain containing, apoptosis associated protein 1	-0.24	0.607235	3.12235	2.48421	0.0267735	0.6595	-3.47389
216	TRAPPC13	trafficking protein particle complex 13	-0.24	0.59888	2.91749	2.64316	0.0197354	0.625348	-3.20449
217	RPL22L1	ribosomal protein L22-like 1	-0.24	0.498634	4.15062	1.13066	0.27785	0.888388	-5.3956
218	TRIM36	tripartite motif containing 36	-0.24	0.88067	2.14996	1.37751	0.190726	0.855028	-5.11748
219	TMBIM4	transmembrane BAX inhibitor motif containing 4	-0.24	0.55784	2.61453	1.07643	0.300564	0.895489	-5.4508
220	SLC2A1	solute carrier family 2 (facilitated glucose transporter), member 1	-0.24	3.2288	6.08183	4.59198	0.000456923	0.219976	0.174909
221	EMC2	ER membrane protein complex subunit 2	-0.24	0.540148	4.06028	2.12376	0.05266	0.748699	-4.06235
222	PM20D2	peptidase M20 domain containing 2	-0.23	0.479305	3.98005	0.94899	0.359276	0.899771	-5.57148
223	MT1M	metallothionein 1M	-0.23	0.922812	4.98269	0.944524	0.361472	0.899901	-5.57547
224	NKTR	natural killer-tumor recognition sequence	-0.23	0.352093	3.30098	1.46486	0.165817	0.845133	-5.00928
225	STEAP2	STEAP family member 2, metalloreductase	-0.23	0.406553	1.77955	1.22336	0.242081	0.873421	-5.29619
226	CBX1	chromobox homolog 1	-0.23	0.651523	6.28067	2.0452	0.0608016	0.76993	-4.18528
227	LIN54	lin-54 homolog (C. elegans)	-0.23	0.505821	3.44863	2.17245	0.0481357	0.73372	-3.9851
228	TMEM165	transmembrane protein 165	-0.23	0.249304	5.59685	0.950268	0.35865	0.899771	-5.57033
229	LYRM7	LYR motif containing 7	-0.23	0.540323	4.1399	2.28681	0.0388984	0.706944	-3.80066
230	TAF1D	TATA box binding protein (TBP)-associated factor, RNA polymerase I, D, 41kDa	-0.23	1.36734	3.99634	3.55098	0.00335461	0.424859	-1.6155
231	GOLGA8H	golgin A8 family, member H	-0.23	0.451145	0.792635	2.0942	0.0555978	0.757028	-4.10887
232	SAV1	salvador homolog 1 (Drosophila)	-0.23	0.859479	4.32022	3.13575	0.00756249	0.509146	-2.34749
233	ELK4	ELK4, ETS-domain protein (SRF accessory protein 1)	-0.23	0.27027	4.21059	0.683068	0.506098	0.912744	-5.77964
234	ZNF570	zinc finger protein 570	-0.23	0.291723	2.55924	0.824207	0.42412	0.912744	-5.67676
235	SMU1	smu-1 suppressor of mec-8 and unc-52 homolog (C. elegans)	-0.23	0.325007	5.06305	0.919419	0.373985	0.901439	-5.5976
236	SLC35B4	solute carrier family 35 (UDP-xylose/UDP-N-acetylglucosamine transporter), member B4	-0.23	0.437368	4.2714	1.38079	0.189738	0.854748	-5.11351
237	MTRF1	mitochondrial translational release factor 1	-0.23	0.568807	2.52921	2.57981	0.0222949	0.640866	-3.31244
238	LRRC40	leucine rich repeat containing 40	-0.23	0.253158	4.94883	0.855325	0.407269	0.912744	-5.65174
239	IRAK4	interleukin-1 receptor-associated kinase 4	-0.23	0.610209	3.66359	2.26693	0.0403739	0.711676	-3.833
240	CCDC59	coiled-coil domain containing 59	-0.23	0.882381	4.03481	3.0046	0.00977507	0.540441	-2.57783
241	NUP37	nucleoporin 37kDa	-0.23	0.615294	3.4194	2.63688	0.0199755	0.627218	-3.21521
242	MALSU1	mitochondrial assembly of ribosomal large subunit 1	-0.23	0.343519	4.15482	1.07455	0.301376	0.895489	-5.45268
243	DCTN2	dynactin 2 (p50)	-0.22	0.879899	4.88267	2.15269	0.0499267	0.740673	-4.01655
244	POLR3G	polymerase (RNA) III (DNA directed) polypeptide G (32kD)	-0.22	0.636864	1.80669	2.21004	0.0448936	0.726392	-3.92492
245	SMIM15	small integral membrane protein 15	-0.22	0.582199	5.17097	2.67687	0.0184919	0.614276	-3.14676
246	APIP	APAF1 interacting protein	-0.22	0.43699	2.88557	1.40945	0.181281	0.849602	-5.07847
247	CAV2	caveolin 2	-0.22	0.24539	3.71385	0.795261	0.440197	0.912744	-5.69929
248	NAMPT	nicotinamide phosphoribosyltransferase	-0.22	1.20255	4.50891	3.34051	0.00506352	0.456394	-1.98657
249	ABI1	abl-interactor 1	-0.22	0.299066	5.35056	0.909469	0.379026	0.902712	-5.60623
250	ZNF431	zinc finger protein 431	-0.22	0.46649	2.4846	2.16219	0.0490578	0.738649	-4.00144
251	SLC30A6	solute carrier family 30 (zinc transporter), member 6	-0.22	0.246806	4.67371	0.964365	0.351792	0.898444	-5.55761
252	FKBP3	FK506 binding protein 3, 25kDa	-0.22	0.469354	5.83285	1.14646	0.271487	0.883639	-5.37911
253	CSNK1A1	casein kinase 1, alpha 1	-0.22	0.707606	4.94664	3.04109	0.00910202	0.531616	-2.51386
254	RBM3	RNA binding motif (RNP1, RRM) protein 3	-0.22	0.879792	6.47462	2.55071	0.0235755	0.644274	-3.36178
255	PGRMC1	progesterone receptor membrane component 1	-0.22	0.53057	7.41217	1.59078	0.134755	0.845133	-4.84515
256	KLF9	Kruppel-like factor 9	-0.22	0.279872	4.9914	0.937859	0.364765	0.900598	-5.5814
257	CHMP2B	charged multivesicular body protein 2B	-0.22	0.375693	3.75572	1.235	0.237858	0.872004	-5.28327
258	LYSMD3	LysM, putative peptidoglycan-binding, domain containing 3	-0.22	0.635257	4.11017	2.97652	0.0103266	0.540441	-2.62701
259	PNPLA4	patatin-like phospholipase domain containing 4	-0.22	0.267244	3.3786	0.559629	0.584883	0.939224	-5.85487
260	ENSA	endosulfine alpha	-0.22	0.415588	6.23827	1.13835	0.274738	0.887175	-5.3876
261	ZWINT	ZW10 interacting kinetochore protein	-0.22	0.507165	5.19081	1.18304	0.257176	0.87703	-5.34021
262	UBE2J1	ubiquitin-conjugating enzyme E2, J1	-0.22	0.277881	6.07795	1.13735	0.275143	0.887411	-5.38865
263	RGS2	regulator of G-protein signaling 2, 24kDa	-0.21	2.44236	5.26578	3.60767	0.00300326	0.417915	-1.51575
264	MYBL1	v-myb avian myeloblastosis viral oncogene homolog-like 1	-0.21	0.898345	2.94163	1.74527	0.103604	0.841496	-4.6318
265	CEP55	centrosomal protein 55kDa	-0.21	0.277142	4.48577	0.635273	0.535852	0.918985	-5.81044
266	TWF1	twinfilin actin-binding protein 1	-0.21	0.461858	5.86913	1.63318	0.125486	0.845133	-4.78786
267	OTUD3	OTU domain containing 3	-0.21	0.452929	3.37358	1.40622	0.182219	0.850088	-5.08245
268	ABCA13	ATP-binding cassette, sub-family A (ABC1), member 13	-0.21	1.10487	0.825923	3.24368	0.00612129	0.477439	-2.15737
269	FUBP3	far upstream element (FUSE) binding protein 3	-0.21	0.670579	4.94886	2.05076	0.0601894	0.767678	-4.17665
270	SLC7A2	solute carrier family 7 (cationic amino acid transporter, y+ system), member 2	-0.21	0.762404	3.52377	1.52116	0.151251	0.845133	-4.93704
271	TEFM	transcription elongation factor, mitochondrial	-0.21	0.532878	2.70491	2.20286	0.0454964	0.726974	-3.93644
272	DDX21	DEAD (Asp-Glu-Ala-Asp) box helicase 21	-0.21	0.671634	5.95513	2.06713	0.05842	0.76341	-4.1512
273	ARL4C	ADP-ribosylation factor-like 4C	-0.21	0.884519	6.41894	1.91212	0.0772794	0.796833	-4.38818
274	MEIS2	Meis homeobox 2	-0.21	0.63758	2.46802	1.15601	0.267693	0.881604	-5.36905
275	TTC17	tetratricopeptide repeat domain 17	-0.21	0.466287	4.11437	2.37984	0.0326464	0.68713	-3.64787
276	SMAD9	SMAD family member 9	-0.21	0.481648	3.76133	0.734956	0.474919	0.912744	-5.74387
277	TNPO1	transportin 1	-0.21	0.417658	5.29322	2.13812	0.0512866	0.74611	-4.03966
278	NPM1	nucleophosmin (nucleolar phosphoprotein B23, numatrin)	-0.21	0.777887	7.24137	2.367	0.0334488	0.689709	-3.6691
279	SLC22A15	solute carrier family 22, member 15	-0.21	0.709207	2.9886	1.52405	0.150533	0.845133	-4.93328
280	EIF1	eukaryotic translation initiation factor 1	-0.21	0.945959	8.73273	3.24241	0.00613646	0.477439	-2.15959
281	SIKE1	suppressor of IKBKE 1	-0.21	0.277356	5.13851	1.00655	0.33182	0.895489	-5.51857
282	GSTO1	glutathione S-transferase omega 1	-0.21	0.349488	6.59745	1.5447	0.14549	0.845133	-4.90628
283	TRMT10B	tRNA methyltransferase 10 homolog B (S. cerevisiae)	-0.21	0.309034	3.28463	1.50645	0.15495	0.845133	-4.95611
284	BBIP1	BBSome interacting protein 1	-0.21	0.435779	1.96377	1.7323	0.105952	0.843887	-4.65019

## Sheet: Table 2C
	gene_name	Gene.name	Total.context...score	logFC	AveExpr	t	P.Value	adj.P.Val	B
1	HMGB1	high mobility group box 1	-0.84	0.148203	6.67564	1.05783	0.293172	1	-5.27175
2	RRM2B	ribonucleotide reductase M2 B (TP53 inducible)	-0.72	0.238709	4.26588	1.60263	0.112781	1	-4.62241
3	TDRD3	tudor domain containing 3	-0.7	0.198763	3.79778	0.829061	0.409426	1	-5.46749
4	TDRP	testis development related protein	-0.66	0.546045	2.83077	2.1974	0.0307528	1	-3.63333
5	RPAIN	RPA interacting protein	-0.62	0.20168	2.57973	1.50983	0.134849	1	-4.75084
6	EXOSC8	exosome component 8	-0.59	0.317554	4.04199	2.40157	0.0185372	1	-3.23052
7	ORMDL2	ORM1-like 2 (S. cerevisiae)	-0.59	0.298352	3.37759	1.7566	0.08264	1	-4.39357
8	NABP1	nucleic acid binding protein 1	-0.57	0.208838	2.14856	1.4935	0.139063	1	-4.7727
9	VCPKMT	valosin containing protein lysine (K) methyltransferase	-0.57	0.292923	4.00287	2.00608	0.0480742	1	-3.98205
10	TRIQK	triple QxxK/R motif containing	-0.56	0.173688	3.8425	1.26865	0.208081	1	-5.05067
11	SMNDC1	survival motor neuron domain containing 1	-0.56	0.203577	4.17423	1.50756	0.135429	1	-4.7539
12	CFL2	cofilin 2 (muscle)	-0.55	0.189969	5.48564	1.09145	0.278205	1	-5.2391
13	PHYKPL	5-phosphohydroxy-L-lysine phospho-lyase	-0.55	0.258915	3.19589	2.1542	0.0340971	1	-3.71453
14	UQCRB	ubiquinol-cytochrome c reductase binding protein	-0.54	0.421716	4.6292	2.73768	0.00755552	1	-2.50152
15	ZNF195	zinc finger protein 195	-0.53	0.162225	2.6078	1.30234	0.19637	1	-5.01177
16	CBLN2	cerebellin 2 precursor	-0.53	0.520626	2.22734	1.27136	0.207119	1	-5.04758
17	COX5A	cytochrome c oxidase subunit Va	-0.51	0.216386	7.53607	1.65647	0.101367	1	-4.5446
18	ST3GAL6	ST3 beta-galactoside alpha-2,3-sialyltransferase 6	-0.49	0.267883	2.85257	1.49308	0.139173	1	-4.77326
19	EIF2B1	eukaryotic translation initiation factor 2B, subunit 1 alpha, 26kDa	-0.49	0.163049	5.72936	1.51069	0.134632	1	-4.7497
20	MMP27	matrix metallopeptidase 27	-0.48	0.175685	0.232066	1.73366	0.0866582	1	-4.4289
21	APRT	adenine phosphoribosyltransferase	-0.48	0.168822	6.4374	0.982459	0.328703	1	-5.34136
22	C11orf54	chromosome 11 open reading frame 54	-0.47	0.199826	2.77332	1.41595	0.160499	1	-4.87343
23	CISD1	CDGSH iron sulfur domain 1	-0.45	0.184927	4.43595	1.17722	0.242441	1	-5.15129
24	ACER2	alkaline ceramidase 2	-0.45	0.215078	1.22106	1.52882	0.130076	1	-4.72515
25	PAFAH1B2	platelet-activating factor acetylhydrolase 1b, catalytic subunit 2 (30kDa)	-0.45	0.222612	5.60456	1.53005	0.129771	1	-4.72347
26	B3GALNT1	beta-1,3-N-acetylgalactosaminyltransferase 1 (globoside blood group)	-0.44	0.429491	3.7324	2.56031	0.0122521	1	-2.8962
27	FUCA2	fucosidase, alpha-L- 2, plasma	-0.44	0.229802	6.25592	1.62531	0.107853	1	-4.58992
28	IL23A	interleukin 23, alpha subunit p19	-0.43	0.194835	1.38603	1.34936	0.180856	1	-4.95585
29	HOXA5	homeobox A5	-0.43	0.437349	4.07602	2.28001	0.0251479	1	-3.47409
30	CORT	cortistatin	-0.43	0.858858	2.60497	2.79999	0.00634304	1	-2.35772
31	RPP30	ribonuclease P/MRP 30kDa subunit	-0.42	0.309199	4.05078	2.4511	0.0163216	1	-3.12816
32	COCH	cochlin	-0.41	0.577663	1.85722	1.43681	0.154496	1	-4.84683
33	CTXN3	cortexin 3	-0.41	0.150624	0.358509	1.22384	0.224442	1	-5.10089
34	CCNE2	cyclin E2	-0.41	0.168547	2.41547	0.746444	0.457489	1	-5.52673
35	SALL1	sal-like 1 (Drosophila)	-0.41	0.571085	2.5711	1.86779	0.0652881	1	-4.21631
36	PMPCB	peptidase (mitochondrial processing) beta	-0.4	0.232931	4.68522	2.05724	0.0427741	1	-3.89158
37	CDADC1	cytidine and dCMP deaminase domain containing 1	-0.38	0.166805	2.42817	1.23112	0.221723	1	-5.09285
38	CHN1	chimerin 1	-0.38	0.162553	4.18014	0.686938	0.49402	1	-5.5656
39	ALS2	amyotrophic lateral sclerosis 2 (juvenile)	-0.37	0.283724	3.1241	1.89607	0.0613983	1	-4.16964
40	SFXN1	sideroflexin 1	-0.37	0.291609	4.45085	2.03019	0.04551	1	-3.93966
41	ARPC5	actin related protein 2/3 complex, subunit 5, 16kDa	-0.37	0.262268	6.0973	1.93231	0.0567018	1	-4.10891
42	WDR72	WD repeat domain 72	-0.37	0.967706	1.69172	2.83869	0.00568256	1	-2.26708
43	CDC14A	cell division cycle 14A	-0.37	0.266881	2.06622	1.56697	0.120892	1	-4.67261
44	PDIA4	protein disulfide isomerase family A, member 4	-0.36	0.198672	8.3045	1.23813	0.219128	1	-5.08507
45	TTC13	tetratricopeptide repeat domain 13	-0.36	0.281386	3.57711	1.8734	0.0645013	1	-4.20711
46	CA13	carbonic anhydrase XIII	-0.36	0.450145	1.65443	2.71177	0.00811932	1	-2.56054
47	TMED7	transmembrane emp24 protein transport domain containing 7	-0.36	0.168805	5.90353	1.20556	0.23138	1	-5.12088
48	GOLM1	golgi membrane protein 1	-0.35	0.224824	6.84511	1.20259	0.232524	1	-5.1241
49	UBE2N	ubiquitin-conjugating enzyme E2N	-0.35	0.150085	5.37037	1.4644	0.146827	1	-4.81109
50	SH2D4A	SH2 domain containing 4A	-0.35	0.396181	3.07153	1.84248	0.0689423	1	-4.25753
51	MYCBP2	MYC binding protein 2, E3 ubiquitin protein ligase	-0.35	0.274485	3.47854	1.66084	0.100484	1	-4.53818
52	DNAJC3	DnaJ (Hsp40) homolog, subfamily C, member 3	-0.35	0.223252	5.86737	1.11163	0.269478	1	-5.21902
53	RMDN2	regulator of microtubule dynamics 2	-0.35	0.457715	1.94284	3.43434	0.000926049	0.839037	-0.750937
54	GYPE	glycophorin E (MNS blood group)	-0.34	0.156625	1.83546	0.666636	0.506837	1	-5.57813
55	RRAGD	Ras-related GTP binding D	-0.34	0.252572	3.97287	1.21619	0.22733	1	-5.1093
56	CCNB1	cyclin B1	-0.34	0.303384	6.51669	1.8534	0.0673458	1	-4.23981
57	SPAG7	sperm associated antigen 7	-0.33	0.250663	5.22962	1.84766	0.0681818	1	-4.24915
58	COMMD10	COMM domain containing 10	-0.33	0.282372	4.031	1.90441	0.0602898	1	-4.15576
59	NRAS	neuroblastoma RAS viral (v-ras) oncogene homolog	-0.33	0.216951	6.25635	1.32977	0.187205	1	-4.97938
60	TSPAN6	tetraspanin 6	-0.33	0.204919	5.09482	1.33057	0.186941	1	-4.97843
61	TTC14	tetratricopeptide repeat domain 14	-0.32	0.157577	2.92597	1.0281	0.306864	1	-5.29981
62	ANP32E	acidic (leucine-rich) nuclear phosphoprotein 32 family, member E	-0.32	0.16236	6.2629	0.828368	0.409816	1	-5.46801
63	PDK1	pyruvate dehydrogenase kinase, isozyme 1	-0.32	0.499769	2.59968	2.34624	0.0213258	1	-3.34274
64	LOX	lysyl oxidase	-0.32	0.4665	7.25934	1.87909	0.06371	1	-4.19774
65	NDFIP1	Nedd4 family interacting protein 1	-0.32	0.231778	6.16683	2.08388	0.040218	1	-3.84365
66	RNF128	ring finger protein 128, E3 ubiquitin protein ligase	-0.31	0.357324	1.67989	1.58242	0.117321	1	-4.65098
67	ARHGAP42	Rho GTPase activating protein 42	-0.31	0.256004	3.4356	1.35903	0.177784	1	-4.94411
68	MTDH	metadherin	-0.31	0.229879	6.95432	1.46278	0.14727	1	-4.81321
69	LIPT2	lipoyl(octanoyl) transferase 2 (putative)	-0.31	0.153879	1.32753	1.3882	0.168757	1	-4.90824
70	RPL37A	ribosomal protein L37a	-0.31	0.342584	8.06508	1.87673	0.0640369	1	-4.20163
71	SLC25A16	solute carrier family 25 (mitochondrial carrier; Graves disease autoantigen), member 16	-0.31	0.190412	3.09016	1.64414	0.103895	1	-4.56263
72	MARK3	MAP/microtubule affinity-regulating kinase 3	-0.31	0.335373	4.10315	2.46228	0.0158557	1	-3.10482
73	USP15	ubiquitin specific peptidase 15	-0.31	0.195508	2.80488	1.71561	0.0899303	1	-4.45639
74	NDUFB9	NADH dehydrogenase (ubiquinone) 1 beta subcomplex, 9, 22kDa	-0.31	0.274764	3.91984	1.38051	0.171102	1	-4.91776
75	COL24A1	collagen, type XXIV, alpha 1	-0.3	0.900199	4.08332	2.87485	0.00512306	0.996042	-2.18148
76	CLDN11	claudin 11	-0.3	1.17339	1.61746	3.7998	0.000273657	0.728202	0.282784
77	HELLS	helicase, lymphoid-specific	-0.3	0.202646	3.282	1.10028	0.274363	1	-5.23035
78	SNAPC3	small nuclear RNA activating complex, polypeptide 3, 50kDa	-0.3	0.508962	4.10865	3.06482	0.00293042	0.963943	-1.7177
79	KTN1	kinectin 1 (kinesin receptor)	-0.3	0.219358	5.03577	1.26269	0.210204	1	-5.05745
80	COX17	COX17 cytochrome c oxidase copper chaperone	-0.3	0.325931	4.3907	2.04007	0.0444938	1	-3.92217
81	INTS8	integrator complex subunit 8	-0.3	0.241996	4.26532	1.66712	0.0992255	1	-4.52893
82	MEX3C	mex-3 RNA binding family member C	-0.29	0.16821	3.90952	1.31464	0.192219	1	-4.99733
83	TMEM161B	transmembrane protein 161B	-0.29	0.193471	2.05787	1.66648	0.0993539	1	-4.52988
84	IMPA1	inositol(myo)-1(or 4)-monophosphatase 1	-0.29	0.193319	3.86771	1.23956	0.2186	1	-5.08347
85	FABP5	fatty acid binding protein 5 (psoriasis-associated)	-0.29	0.14433	4.9901	0.539078	0.591263	1	-5.64836
86	IARS2	isoleucyl-tRNA synthetase 2, mitochondrial	-0.29	0.387835	6.0552	2.77091	0.00688477	1	-2.42515
87	ZDHHC21	zinc finger, DHHC-type containing 21	-0.29	0.45355	2.29505	2.91589	0.00454981	0.987872	-2.08329
88	SPCS3	signal peptidase complex subunit 3 homolog (S. cerevisiae)	-0.29	0.245631	6.05001	1.81672	0.0728368	1	-4.29897
89	INTS6	integrator complex subunit 6	-0.29	0.247347	2.40088	2.12706	0.0363565	1	-3.76482
90	INTU	inturned planar cell polarity protein	-0.28	0.202308	2.47118	0.987606	0.32619	1	-5.33676
91	ANGPTL3	angiopoietin-like 3	-0.28	0.186767	0.486656	1.87353	0.0644828	1	-4.20689
92	TCEA3	transcription elongation factor A (SII), 3	-0.28	0.601876	5.57808	2.52357	0.0135059	1	-2.9752
93	ICAM1	intercellular adhesion molecule 1	-0.27	0.248059	4.14742	0.900117	0.370638	1	-5.41166
94	NHLRC2	NHL repeat containing 2	-0.27	0.240209	3.15277	1.70009	0.0928243	1	-4.47982
95	GOLGA8B	golgin A8 family, member B	-0.27	0.274783	1.23324	1.44767	0.151441	1	-4.83284
96	NCKAP1	NCK-associated protein 1	-0.27	0.195522	4.28184	1.2764	0.205343	1	-5.04181
97	REEP3	receptor accessory protein 3	-0.27	0.314669	5.30088	2.11491	0.0374093	1	-3.78715
98	PPFIA1	protein tyrosine phosphatase, receptor type, f polypeptide (PTPRF), interacting protein (liprin), alpha 1	-0.27	0.157101	3.74943	1.17561	0.24308	1	-5.153
99	PLGRKT	plasminogen receptor, C-terminal lysine transmembrane protein	-0.27	0.24091	4.14937	1.36637	0.175481	1	-4.93516
100	NBPF6	neuroblastoma breakpoint family, member 6	-0.26	0.195155	1.42951	1.02379	0.30888	1	-5.3038
101	URI1	URI1, prefoldin-like chaperone	-0.26	0.258097	5.99477	0.933188	0.353405	1	-5.38415
102	TMED9	transmembrane emp24 protein transport domain containing 9	-0.26	0.24272	7.80924	1.75849	0.0823171	1	-4.39065
103	ZNF664	zinc finger protein 664	-0.26	0.410748	6.09589	2.36375	0.0204057	1	-3.30747
104	MFF	mitochondrial fission factor	-0.26	0.17731	4.47912	1.25733	0.212128	1	-5.06352
105	P4HA1	prolyl 4-hydroxylase, alpha polypeptide I	-0.26	0.577272	7.59944	2.55396	0.012461	1	-2.90993
106	ZBED4	zinc finger, BED-type containing 4	-0.26	0.147888	3.87698	0.940195	0.349821	1	-5.37819
107	CCDC138	coiled-coil domain containing 138	-0.26	0.164473	2.39905	1.25232	0.213937	1	-5.06917
108	EAPP	E2F-associated phosphoprotein	-0.25	0.213855	5.47357	1.67199	0.0982581	1	-4.52173
109	ATP6V0D2	ATPase, H+ transporting, lysosomal 38kDa, V0 subunit d2	-0.25	0.46251	3.52166	1.17988	0.24139	1	-5.14848
110	LRRC2	leucine rich repeat containing 2	-0.25	0.179327	0.916459	0.818792	0.415228	1	-5.47518
111	UBE2D2	ubiquitin-conjugating enzyme E2D 2	-0.25	0.151119	6.45382	1.59522	0.114429	1	-4.63292
112	SEC61B	Sec61 beta subunit	-0.25	0.151238	8.05329	1.37897	0.171575	1	-4.91967
113	MALT1	mucosa associated lymphoid tissue lymphoma translocation gene 1	-0.25	0.170201	3.19398	1.34709	0.181585	1	-4.9586
114	TMEM44	transmembrane protein 44	-0.25	0.296257	3.92426	1.95297	0.0541619	1	-4.07381
115	HNRNPC	heterogeneous nuclear ribonucleoprotein C (C1/C2)	-0.25	0.188362	7.63145	1.7661	0.0810224	1	-4.37882
116	ABCB7	ATP-binding cassette, sub-family B (MDR/TAP), member 7	-0.25	0.144953	4.04963	1.12639	0.263218	1	-5.20411
117	PLAC8	placenta-specific 8	-0.25	0.393824	1.46005	1.95132	0.0543612	1	-4.07662
118	GNG11	guanine nucleotide binding protein (G protein), gamma 11	-0.25	0.144585	5.27111	0.787125	0.43343	1	-5.49832
119	CCNE1	cyclin E1	-0.24	0.481525	4.80764	1.35777	0.178182	1	-4.94565
120	NPY2R	neuropeptide Y receptor Y2	-0.24	0.470019	0.754678	1.77476	0.0795703	1	-4.3653
121	MMP20	matrix metallopeptidase 20	-0.24	0.333177	0.953841	1.17229	0.244405	1	-5.15652
122	DUSP5	dual specificity phosphatase 5	-0.24	0.526089	4.58973	2.58885	0.011352	1	-2.83419
123	EBF1	early B-cell factor 1	-0.24	0.44613	4.74802	2.11438	0.0374554	1	-3.78811
124	ARFGEF2	ADP-ribosylation factor guanine nucleotide-exchange factor 2 (brefeldin A-inhibited)	-0.24	0.202269	4.31417	1.25618	0.212543	1	-5.06482
125	MED4	mediator complex subunit 4	-0.24	0.149413	4.46045	1.04106	0.300843	1	-5.28767
126	ANO1	anoctamin 1, calcium activated chloride channel	-0.24	0.327734	3.08646	1.23646	0.219743	1	-5.08692
127	UCK2	uridine-cytidine kinase 2	-0.24	0.288139	4.1366	1.83934	0.0694087	1	-4.26262
128	TRAPPC13	trafficking protein particle complex 13	-0.24	0.163336	2.92028	1.24087	0.218118	1	-5.08201
129	RPL22L1	ribosomal protein L22-like 1	-0.24	0.48123	4.38235	2.17596	0.032375	1	-3.67381
130	ABHD13	abhydrolase domain containing 13	-0.24	0.312659	3.2653	1.6913	0.0944974	1	-4.493
131	TRIM36	tripartite motif containing 36	-0.24	0.212199	1.96624	0.865517	0.389227	1	-5.43941
132	IL17RB	interleukin 17 receptor B	-0.24	0.199303	2.36743	0.890182	0.375918	1	-5.41974
133	SLC2A1	solute carrier family 2 (facilitated glucose transporter), member 1	-0.24	0.148697	5.09696	0.436427	0.663649	1	-5.69415
134	MT1M	metallothionein 1M	-0.23	0.373196	5.1334	1.0784	0.283951	1	-5.25189
135	MAMDC2	MAM domain containing 2	-0.23	0.629162	5.05601	1.84688	0.0682956	1	-4.25041
136	WIF1	WNT inhibitory factor 1	-0.23	1.29771	3.13581	2.52298	0.0135267	1	-2.97645
137	EFHD1	EF-hand domain family, member D1	-0.23	0.75507	4.59797	1.99978	0.0487644	1	-3.99305
138	KANSL1L	KAT8 regulatory NSL complex subunit 1-like	-0.23	0.234423	2.2764	1.63944	0.104873	1	-4.56948
139	TAF1D	TATA box binding protein (TBP)-associated factor, RNA polymerase I, D, 41kDa	-0.23	0.42809	4.15616	2.45597	0.0161174	1	-3.11801
140	UQCRFS1	ubiquinol-cytochrome c reductase, Rieske iron-sulfur polypeptide 1	-0.23	0.347584	6.42267	1.27783	0.20484	1	-5.04017
141	ELK4	ELK4, ETS-domain protein (SRF accessory protein 1)	-0.23	0.228124	4.04175	1.58523	0.116683	1	-4.64704
142	SMU1	smu-1 suppressor of mec-8 and unc-52 homolog (C. elegans)	-0.23	0.154102	5.14151	1.18979	0.237491	1	-5.1379
143	MTRF1	mitochondrial translational release factor 1	-0.23	0.180227	2.66543	1.47775	0.143224	1	-4.79357
144	SRPK1	SRSF protein kinase 1	-0.23	0.23642	3.96322	1.33987	0.183911	1	-4.96729
145	CCDC59	coiled-coil domain containing 59	-0.23	0.239382	4.39765	1.61266	0.11058	1	-4.6081
146	NUP37	nucleoporin 37kDa	-0.23	0.242951	3.68187	1.8317	0.0705505	1	-4.27494
147	DCTN2	dynactin 2 (p50)	-0.22	0.253053	5.00365	1.6493	0.102831	1	-4.5551
148	COQ10A	coenzyme Q10 homolog A (S. cerevisiae)	-0.22	0.189368	2.79041	1.31563	0.191886	1	-4.99615
149	POLR3G	polymerase (RNA) III (DNA directed) polypeptide G (32kD)	-0.22	0.369127	1.72561	2.49323	0.0146266	1	-3.03969
150	RABGAP1L	RAB GTPase activating protein 1-like	-0.22	0.249541	3.15852	1.4838	0.141616	1	-4.78558
151	ARHGAP12	Rho GTPase activating protein 12	-0.22	0.186824	3.40037	1.19652	0.234871	1	-5.13066
152	ABI1	abl-interactor 1	-0.22	0.184438	5.2686	1.36387	0.176261	1	-4.93821
153	RBM3	RNA binding motif (RNP1, RRM) protein 3	-0.22	0.29109	6.6343	2.05146	0.0433466	1	-3.9019
154	KLF9	Kruppel-like factor 9	-0.22	0.232053	4.80058	1.2906	0.200392	1	-5.02543
155	LYSMD3	LysM, putative peptidoglycan-binding, domain containing 3	-0.22	0.248761	4.10119	1.61729	0.109576	1	-4.60146
156	EFCAB2	EF-hand calcium binding domain 2	-0.22	0.284929	1.38072	2.42768	0.0173379	1	-3.17678
157	ZWINT	ZW10 interacting kinetochore protein	-0.22	0.390394	5.64701	2.06803	0.0417227	1	-3.87224
158	CEP55	centrosomal protein 55kDa	-0.21	0.210748	4.73446	1.2153	0.227665	1	-5.11026
159	TBX20	T-box 20	-0.21	0.217264	1.32739	0.787045	0.433477	1	-5.49838
160	ENTPD3	ectonucleoside triphosphate diphosphohydrolase 3	-0.21	1.07039	3.36182	2.63295	0.0100778	1	-2.73722
161	UBE2D1	ubiquitin-conjugating enzyme E2D 1	-0.21	0.179787	3.96464	1.24939	0.215002	1	-5.07247
162	SLC7A2	solute carrier family 7 (cationic amino acid transporter, y+ system), member 2	-0.21	0.196344	3.38295	0.705953	0.482176	1	-5.55352
163	DDX21	DEAD (Asp-Glu-Ala-Asp) box helicase 21	-0.21	0.224995	5.99104	1.33321	0.186078	1	-4.97528
164	SEMA6D	sema domain, transmembrane domain (TM), and cytoplasmic domain, (semaphorin) 6D	-0.21	0.172651	3.3455	0.641177	0.523158	1	-5.59332
165	SMAD9	SMAD family member 9	-0.21	0.660897	3.58744	2.61631	0.0105426	1	-2.77398
166	AKIRIN1	akirin 1	-0.21	0.375304	6.71745	2.38682	0.0192472	1	-3.26067
167	RAB2A	RAB2A, member RAS oncogene family	-0.21	0.145824	6.61483	1.04816	0.29758	1	-5.28096
168	FBXO28	F-box protein 28	-0.21	0.295296	4.4093	2.12225	0.0367703	1	-3.77368
169	NPM1	nucleophosmin (nucleolar phosphoprotein B23, numatrin)	-0.21	0.287538	7.3462	1.76776	0.0807419	1	-4.37623
170	EIF1	eukaryotic translation initiation factor 1	-0.21	0.167709	8.67384	1.28891	0.200977	1	-5.02739
171	GSTO1	glutathione S-transferase omega 1	-0.21	0.246636	6.9114	1.72058	0.089019	1	-4.44885
172	BBIP1	BBSome interacting protein 1	-0.21	0.286539	2.15611	2.65343	0.00953134	1	-2.69172

## Sheet: Table 2D
	gene_name	Gene.name	Total.context...score	logFC	AveExpr	t	P.Value	adj.P.Val	B
1	DCUN1D5	DCN1, defective in cullin neddylation 1, domain containing 5	-1.48	0.777423	3.02797	2.93563	0.0111849	0.544132	-2.6985
2	RORA	RAR-related orphan receptor A	-0.93	1.68549	2.33072	3.88347	0.00175754	0.354108	-1.0329
3	ZNF280D	zinc finger protein 280D	-0.69	0.593896	2.25351	2.777	0.015232	0.589694	-2.97429
4	CCL20	chemokine (C-C motif) ligand 20	-0.68	0.660029	0.847456	2.03178	0.0623043	0.775191	-4.20606
5	LYRM7	LYR motif containing 7	-0.66	0.540323	4.1399	2.28681	0.0388984	0.706944	-3.80066
6	SNX2	sorting nexin 2	-0.65	0.493463	4.66545	2.27018	0.0401293	0.709997	-3.82773
7	INPP1	inositol polyphosphate-1-phosphatase	-0.6	0.892201	4.26887	2.27816	0.0395338	0.709997	-3.81474
8	RGS2	regulator of G-protein signaling 2, 24kDa	-0.59	2.44236	5.26578	3.60767	0.00300326	0.417915	-1.51575
9	THAP1	THAP domain containing, apoptosis associated protein 1	-0.58	0.607235	3.12235	2.48421	0.0267735	0.6595	-3.47389
10	ATP7A	ATPase, Cu++ transporting, alpha polypeptide	-0.56	0.718565	3.24897	1.97211	0.0694042	0.781797	-4.2976
11	KLHL8	kelch-like family member 8	-0.56	0.506332	4.15813	1.9369	0.0739326	0.79107	-4.35094
12	MFSD8	major facilitator superfamily domain containing 8	-0.56	0.422397	2.63495	2.16715	0.04861	0.736434	-3.99354
13	ZNF292	zinc finger protein 292	-0.56	0.631531	3.34685	2.2698	0.040158	0.709997	-3.82835
14	TMEM161B	transmembrane protein 161B	-0.55	0.708259	2.14017	3.11626	0.00785669	0.513528	-2.38178
15	NGLY1	N-glycanase 1	-0.54	0.54793	3.63425	2.06321	0.0588391	0.76341	-4.1573
16	PTS	6-pyruvoyltetrahydropterin synthase	-0.54	0.706021	4.40089	2.04414	0.0609198	0.770516	-4.18693
17	CDC73	cell division cycle 73	-0.54	0.389981	3.6568	0.923357	0.372002	0.901075	-5.59417
18	ZNF699	zinc finger protein 699	-0.53	0.554954	2.00892	2.06439	0.0587123	0.76341	-4.15546
19	RDX	radixin	-0.53	0.657884	5.51266	1.79676	0.0947345	0.827279	-4.558
20	STYX	serine/threonine/tyrosine interacting protein	-0.52	0.420501	4.59966	1.71152	0.10981	0.845133	-4.67947
21	CHI3L2	chitinase 3-like 2	-0.51	1.63588	2.38141	1.49792	0.157127	0.845133	-4.96709
22	AC024257.1	CDNA FLJ26186 fis, clone ADG04757; Uncharacterized protein	-0.51	0.522628	0.237453	1.78802	0.0961898	0.829171	-4.57061
23	SYDE2	synapse defective 1, Rho GTPase, homolog 2 (C. elegans)	-0.51	0.709613	2.37693	2.49816	0.02607	0.656308	-3.45045
24	SOD2	superoxide dismutase 2, mitochondrial	-0.51	1.05327	4.73698	1.77967	0.0976006	0.833528	-4.58263
25	STEAP1	six transmembrane epithelial antigen of the prostate 1	-0.5	0.886144	4.53733	1.62061	0.128175	0.845133	-4.80495
26	RAB6A	RAB6A, member RAS oncogene family	-0.5	0.466502	6.0807	1.55304	0.143495	0.845133	-4.89531
27	FZD3	frizzled family receptor 3	-0.49	0.646747	2.27596	1.59026	0.134872	0.845133	-4.84585
28	TEX30	testis expressed 30	-0.48	0.531721	2.78261	1.28679	0.219757	0.86304	-5.22461
29	SSX2IP	synovial sarcoma, X breakpoint 2 interacting protein	-0.48	1.02634	2.59609	1.73054	0.106274	0.844481	-4.65268
30	SPTLC1	serine palmitoyltransferase, long chain base subunit 1	-0.47	0.596699	5.10855	2.45369	0.028377	0.668745	-3.52502
31	TMED7	transmembrane emp24 protein transport domain containing 7	-0.47	0.36944	6.10732	1.08121	0.298509	0.895489	-5.44603
32	RGS4	regulator of G-protein signaling 4	-0.47	0.493706	2.23293	0.612023	0.550674	0.924157	-5.82466
33	PAIP2	poly(A) binding protein interacting protein 2	-0.47	0.694193	5.24537	1.50667	0.154892	0.845133	-4.95581
34	PIGP	phosphatidylinositol glycan anchor biosynthesis, class P	-0.46	0.397728	3.69943	1.71579	0.109008	0.845133	-4.67347
35	LEAP2	liver expressed antimicrobial peptide 2	-0.45	0.630322	1.12124	1.87336	0.0827902	0.804301	-4.44589
36	CTNNAL1	catenin (cadherin-associated protein), alpha-like 1	-0.45	0.620711	5.49664	1.90896	0.0777166	0.797288	-4.39291
37	CREBZF	CREB/ATF bZIP transcription factor	-0.45	0.724268	4.5867	2.53417	0.0243347	0.644682	-3.38975
38	GUCY1A2	guanylate cyclase 1, soluble, alpha 2	-0.45	0.554342	2.2107	1.08572	0.296578	0.895489	-5.44151
39	SPTSSA	serine palmitoyltransferase, small subunit A	-0.45	0.785392	6.00349	2.19383	0.0462654	0.728224	-3.95092
40	MYL1	myosin, light chain 1, alkali; skeletal, fast	-0.44	0.638072	2.06937	0.471068	0.6451	0.967286	-5.90005
41	RFX7	regulatory factor X, 7	-0.42	0.403158	2.96799	1.11804	0.283019	0.89085	-5.40865
42	SIM1	single-minded homolog 1 (Drosophila)	-0.42	0.731241	0.663938	1.87194	0.0829993	0.804382	-4.448
43	HORMAD1	HORMA domain containing 1	-0.42	0.443781	1.56231	0.64308	0.530925	0.917578	-5.80555
44	HOXA13	homeobox A13	-0.42	0.862976	2.43567	1.12318	0.280906	0.890039	-5.40336
45	PRMT3	protein arginine methyltransferase 3	-0.42	0.477905	3.4833	1.74692	0.103309	0.841496	-4.62945
46	MRPL51	mitochondrial ribosomal protein L51	-0.42	0.681612	6.71205	1.39062	0.186799	0.853668	-5.10154
47	THOC7	THO complex 7 homolog (Drosophila)	-0.41	0.430186	5.43092	1.77508	0.0983832	0.834567	-4.58923
48	CD9	CD9 molecule	-0.41	0.641099	6.2721	1.45534	0.168392	0.845654	-5.0213
49	CDK1	cyclin-dependent kinase 1	-0.41	0.412104	4.97383	1.02874	0.32165	0.895489	-5.49747
50	UBE2B	ubiquitin-conjugating enzyme E2B	-0.41	0.411971	5.42666	1.87965	0.081873	0.804123	-4.43657
51	PIGH	phosphatidylinositol glycan anchor biosynthesis, class H	-0.4	0.571793	4.24697	1.72344	0.107581	0.845133	-4.66269
52	UCHL5	ubiquitin carboxyl-terminal hydrolase L5	-0.4	0.548715	3.76344	1.38545	0.18834	0.853818	-5.10784
53	CTTNBP2	cortactin binding protein 2	-0.39	0.763379	0.76946	1.57174	0.139106	0.845133	-4.87056
54	TUBB2B	tubulin, beta 2B class IIb	-0.39	0.827643	4.33072	1.04539	0.314168	0.895489	-5.48137
55	AUH	AU RNA binding protein/enoyl-CoA hydratase	-0.39	0.510149	3.47888	1.20693	0.248148	0.875593	-5.31427
56	SLC2A13	solute carrier family 2 (facilitated glucose transporter), member 13	-0.39	0.539212	2.52289	0.965296	0.351341	0.898218	-5.55676
57	CHN1	chimerin 1	-0.39	0.562282	4.31091	0.862204	0.403605	0.911707	-5.64609
58	CSTF2T	cleavage stimulation factor, 3' pre-RNA, subunit 2, 64kDa, tau variant	-0.38	0.369512	4.60132	1.22425	0.241758	0.873421	-5.29521
59	POLK	polymerase (DNA directed) kappa	-0.38	0.495105	2.57213	2.32489	0.036213	0.698247	-3.7384
60	TYRP1	tyrosinase-related protein 1	-0.38	0.379636	0.470419	1.00813	0.33109	0.895489	-5.51708
61	GPATCH2L	G patch domain containing 2-like	-0.37	0.587106	3.07215	2.67278	0.0186386	0.615789	-3.15377
62	NAPG	N-ethylmaleimide-sensitive factor attachment protein, gamma	-0.37	0.946483	4.3985	2.41127	0.0307596	0.6774	-3.59575
63	VPS13B	vacuolar protein sorting 13 homolog B (yeast)	-0.36	0.41096	3.34071	1.77045	0.0991787	0.83544	-4.59587
64	HAND2	heart and neural crest derivatives expressed 2	-0.36	0.383346	1.09876	0.723623	0.481627	0.912744	-5.75189
65	RPE	ribulose-5-phosphate-3-epimerase	-0.36	0.38583	4.75179	0.74387	0.469683	0.912744	-5.73749
66	HMGN5	high mobility group nucleosome binding domain 5	-0.36	0.83655	3.05843	1.79735	0.0946373	0.827279	-4.55715
67	GPATCH11	G patch domain containing 11	-0.35	0.600495	3.79221	1.99076	0.067109	0.778551	-4.26914
68	ANKRD49	ankyrin repeat domain 49	-0.35	0.581668	3.30532	3.20172	0.00664574	0.489366	-2.23132
69	STEAP2	STEAP family member 2, metalloreductase	-0.35	0.406553	1.77955	1.22336	0.242081	0.873421	-5.29619
70	VDAC1	voltage-dependent anion channel 1	-0.35	0.769553	7.53582	3.98477	0.00144546	0.334663	-0.856927
71	MEX3B	mex-3 RNA binding family member B	-0.35	0.617363	5.17308	1.05225	0.311122	0.895489	-5.47468
72	RAB30	RAB30, member RAS oncogene family	-0.35	0.652115	2.67815	2.88145	0.0124315	0.554076	-2.79301
73	CCT6A	chaperonin containing TCP1, subunit 6A (zeta 1)	-0.35	0.690678	7.2314	1.86346	0.0842535	0.806827	-4.46053
74	MYPN	myopalladin	-0.35	0.378043	0.635045	0.667776	0.515511	0.913417	-5.78972
75	KLHDC1	kelch domain containing 1	-0.34	1.02763	2.34044	3.349	0.00498002	0.454855	-1.97159
76	RPL7	ribosomal protein L7	-0.34	0.718641	9.55601	2.07924	0.0571405	0.760535	-4.13228
77	FAM114A1	family with sequence similarity 114, member A1	-0.34	0.524837	6.18887	1.26028	0.228881	0.866275	-5.25487
78	DNAJB9	DnaJ (Hsp40) homolog, subfamily B, member 9	-0.34	0.391188	5.62682	0.836918	0.417183	0.912744	-5.66664
79	IMMP2L	IMP2 inner mitochondrial membrane peptidase-like (S. cerevisiae)	-0.34	0.547386	2.22193	1.9472	0.0725813	0.78776	-4.33539
80	CCSAP	centriole, cilia and spindle-associated protein	-0.34	0.410386	3.25335	1.08132	0.298461	0.895489	-5.44592
81	PFDN4	prefoldin subunit 4	-0.34	0.439469	4.82775	1.02453	0.323561	0.895489	-5.5015
82	CCDC59	coiled-coil domain containing 59	-0.34	0.882381	4.03481	3.0046	0.00977507	0.540441	-2.57783
83	CCL28	chemokine (C-C motif) ligand 28	-0.33	1.21865	3.58753	2.80327	0.0144744	0.582704	-2.92882
84	PSMC6	proteasome (prosome, macropain) 26S subunit, ATPase, 6	-0.33	0.646819	4.80666	2.75887	0.0157774	0.595409	-3.00562
85	MTRNR2L6	MT-RNR2-like 6	-0.33	0.389824	0.781479	1.2095	0.247189	0.875334	-5.31145
86	ZNF431	zinc finger protein 431	-0.33	0.46649	2.4846	2.16219	0.0490578	0.738649	-4.00144
87	GOLT1B	golgi transport 1B	-0.33	0.457232	5.7561	1.68059	0.115782	0.845133	-4.72265
88	ZNF273	zinc finger protein 273	-0.32	0.705195	1.96532	1.87551	0.0824765	0.804123	-4.44272
89	SLC38A2	solute carrier family 38, member 2	-0.32	0.471946	6.88841	1.87618	0.0823777	0.804123	-4.44171
90	GK5	glycerol kinase 5 (putative)	-0.32	0.440845	2.73289	1.5565	0.142675	0.845133	-4.89075
91	CHIC1	cysteine-rich hydrophobic domain 1	-0.32	0.604973	2.51508	1.84226	0.0874667	0.81177	-4.49173
92	ZNF140	zinc finger protein 140	-0.32	0.496706	2.89342	1.67416	0.117058	0.845133	-4.73156
93	CCDC122	coiled-coil domain containing 122	-0.31	0.529496	0.828758	2.72457	0.016862	0.60622	-3.06478
94	CEP44	centrosomal protein 44kDa	-0.31	0.500892	2.98379	1.78074	0.0974185	0.833528	-4.58109
95	BTG3	BTG family, member 3	-0.31	0.840694	5.27047	1.83086	0.0892391	0.815759	-4.50842
96	RSL24D1	ribosomal L24 domain containing 1	-0.3	0.679262	4.99749	1.96843	0.0698656	0.781969	-4.3032
97	TDG	thymine-DNA glycosylase	-0.3	0.58765	4.40534	1.95275	0.0718615	0.785003	-4.32699
98	IMPA1	inositol(myo)-1(or 4)-monophosphatase 1	-0.3	0.515407	4.0557	1.44332	0.171693	0.847592	-5.03641
99	DPP8	dipeptidyl-peptidase 8	-0.3	0.661053	3.86009	2.41242	0.0306926	0.6774	-3.59384
100	HAPLN1	hyaluronan and proteoglycan link protein 1	-0.29	1.26829	6.35964	1.34234	0.201587	0.858493	-5.15967
101	CHM	choroideremia (Rab escort protein 1)	-0.29	0.502168	3.30698	1.49202	0.158649	0.845133	-4.97467
102	RAB27B	RAB27B, member RAS oncogene family	-0.29	0.544398	2.7859	0.769575	0.454784	0.912744	-5.71867
103	STX2	syntaxin 2	-0.29	0.76971	4.89016	2.30272	0.0377544	0.704923	-3.7747
104	CCNB2	cyclin B2	-0.28	0.611191	5.35545	1.30752	0.212828	0.860466	-5.20062
105	CXCL6	chemokine (C-X-C motif) ligand 6	-0.28	0.585068	0.597807	1.10922	0.286671	0.894014	-5.4177
106	ZNF800	zinc finger protein 800	-0.28	0.398224	3.73749	2.18122	0.0473604	0.729358	-3.9711
107	EIF1AX	eukaryotic translation initiation factor 1A, X-linked	-0.28	1.04184	6.51859	3.5519	0.00334859	0.424859	-1.61388
108	FAM216A	family with sequence similarity 216, member A	-0.28	1.24742	3.10771	4.49931	0.000543349	0.240939	0.0203879
109	POLR3G	polymerase (RNA) III (DNA directed) polypeptide G (32kD)	-0.27	0.636864	1.80669	2.21004	0.0448936	0.726392	-3.92492
110	ZC3HAV1L	zinc finger CCCH-type, antiviral 1-like	-0.27	1.10398	4.88685	4.56057	0.000484504	0.224351	0.122663
111	AC107021.1	HCG1786590; PRO2533; Uncharacterized protein	-0.27	0.937644	1.12378	2.87	0.012712	0.558615	-2.81294
112	UFM1	ubiquitin-fold modifier 1	-0.27	0.526286	5.06557	1.85527	0.085482	0.808777	-4.47261
113	ANKRD12	ankyrin repeat domain 12	-0.27	0.869627	3.5009	2.41655	0.0304528	0.676655	-3.58697
114	GLRA3	glycine receptor, alpha 3	-0.26	1.30544	1.81806	1.77584	0.0982534	0.834523	-4.58814
115	FAM3C	family with sequence similarity 3, member C	-0.26	1.19457	6.28923	2.83422	0.013629	0.573125	-2.87514
116	TRMT10A	tRNA methyltransferase 10 homolog A (S. cerevisiae)	-0.26	0.608073	2.40294	2.39204	0.0319016	0.682165	-3.62768
117	LPCAT2	lysophosphatidylcholine acyltransferase 2	-0.26	0.442774	3.17205	0.842435	0.414195	0.912744	-5.6622
118	FRS2	fibroblast growth factor receptor substrate 2	-0.26	0.377318	3.92221	1.22332	0.242099	0.873421	-5.29624
119	ITGA4	integrin, alpha 4 (antigen CD49D, alpha 4 subunit of VLA-4 receptor)	-0.26	0.6116	4.09376	0.879084	0.394707	0.907821	-5.63207
120	PHF14	PHD finger protein 14	-0.26	0.436491	3.75478	0.999561	0.335073	0.895656	-5.52514
121	TMBIM4	transmembrane BAX inhibitor motif containing 4	-0.26	0.55784	2.61453	1.07643	0.300564	0.895489	-5.4508
122	C8orf37	chromosome 8 open reading frame 37	-0.25	0.476118	2.47572	2.08194	0.0568596	0.760218	-4.12807
123	AL136115.1	HCG2032337; PRO1848; Uncharacterized protein	-0.25	0.610118	1.28684	1.4218	0.177735	0.847977	-5.06322
124	RPS4X	ribosomal protein S4, X-linked	-0.25	0.479671	9.68052	2.1988	0.0458403	0.726974	-3.94295
125	FAM199X	family with sequence similarity 199, X-linked	-0.25	0.400482	3.58684	1.45744	0.167822	0.845577	-5.01865
126	DGKI	diacylglycerol kinase, iota	-0.25	0.527286	1.99047	2.02646	0.0629088	0.775191	-4.21428
127	SCIN	scinderin	-0.25	0.991169	3.08341	1.18554	0.256219	0.876627	-5.33751
128	NUDT4	nudix (nucleoside diphosphate linked moiety X)-type motif 4	-0.24	0.431391	4.83434	1.66059	0.119792	0.845133	-4.7503
129	EMC7	ER membrane protein complex subunit 7	-0.24	0.419095	6.84722	1.6644	0.119019	0.845133	-4.74505
130	TRMT11	tRNA methyltransferase 11 homolog (S. cerevisiae)	-0.24	0.510881	2.57618	1.81264	0.0921378	0.822019	-4.53497
131	SNX25	sorting nexin 25	-0.24	0.87206	3.72756	2.99067	0.010045	0.540441	-2.60225
132	C15orf48	chromosome 15 open reading frame 48	-0.24	0.937486	0.902254	3.33093	0.00515952	0.45891	-2.00348
133	GTF2H3	general transcription factor IIH, polypeptide 3, 34kDa	-0.24	0.856166	4.67864	2.67696	0.0184888	0.614276	-3.14661
134	AIMP1	aminoacyl tRNA synthetase complex-interacting multifunctional protein 1	-0.24	0.633978	4.01788	3.42619	0.0042816	0.443458	-1.83544
135	SSH2	slingshot protein phosphatase 2	-0.24	0.406897	3.15938	1.15064	0.269818	0.882563	-5.37471
136	SERPINB5	serpin peptidase inhibitor, clade B (ovalbumin), member 5	-0.24	1.35991	1.22712	1.37548	0.191338	0.855189	-5.11994
137	LYSMD3	LysM, putative peptidoglycan-binding, domain containing 3	-0.24	0.635257	4.11017	2.97652	0.0103266	0.540441	-2.62701
138	HOMER2	homer homolog 2 (Drosophila)	-0.23	0.411987	3.75862	0.575735	0.57425	0.935761	-5.84585
139	ZNF680	zinc finger protein 680	-0.23	0.684158	2.73555	2.1541	0.049796	0.740408	-4.0143
140	AP4E1	adaptor-related protein complex 4, epsilon 1 subunit	-0.23	0.571404	3.12766	1.93504	0.0741792	0.79107	-4.35374
141	DDIT4L	DNA-damage-inducible transcript 4-like	-0.23	3.27043	3.4891	2.86314	0.0128828	0.559393	-2.82487
142	PI15	peptidase inhibitor 15	-0.23	2.78719	3.56455	2.73602	0.0164921	0.602411	-3.04505
143	TNFAIP6	tumor necrosis factor, alpha-induced protein 6	-0.23	0.905497	4.90401	0.958238	0.354761	0.899235	-5.56316
144	ANLN	anillin, actin binding protein	-0.23	0.789578	5.12127	1.87362	0.082753	0.804123	-4.44552
145	IGSF11	immunoglobulin superfamily, member 11	-0.23	0.824088	1.423	1.58168	0.136819	0.845133	-4.85732
146	RTCA	RNA 3'-terminal phosphate cyclase	-0.23	0.504815	5.53118	1.48477	0.160537	0.845133	-4.98395
147	CCDC82	coiled-coil domain containing 82	-0.23	0.611504	2.26115	3.38855	0.00460889	0.450262	-1.90182
148	ENPP4	ectonucleotide pyrophosphatase/phosphodiesterase 4 (putative)	-0.23	0.658659	3.25755	0.946388	0.360554	0.899771	-5.5738
149	EVA1A	eva-1 homolog A (C. elegans)	-0.23	0.820054	3.12611	1.13905	0.274457	0.886984	-5.38687
150	ZDHHC17	zinc finger, DHHC-type containing 17	-0.23	0.599642	3.40446	3.25139	0.00602953	0.476693	-2.14377
151	GJB2	gap junction protein, beta 2, 26kDa	-0.23	1.92703	3.46221	2.02015	0.0636332	0.77541	-4.22401
152	ZFP37	ZFP37 zinc finger protein	-0.23	0.457394	1.9661	1.3751	0.191453	0.855239	-5.12039
153	DUS4L	dihydrouridine synthase 4-like (S. cerevisiae)	-0.23	0.438915	1.2534	2.11165	0.0538453	0.75281	-4.08144
154	SOCS4	suppressor of cytokine signaling 4	-0.23	0.413007	3.91267	1.9806	0.0683508	0.781294	-4.28466
155	MZT1	mitotic spindle organizing protein 1	-0.23	0.676226	4.97431	1.51987	0.151573	0.845133	-4.93872
156	PPIL4	peptidylprolyl isomerase (cyclophilin)-like 4	-0.23	0.604495	4.89334	1.59661	0.133447	0.845133	-4.83734
157	AEBP2	AE binding protein 2	-0.22	0.596456	3.88072	1.89855	0.0791696	0.799801	-4.40845
158	STK3	serine/threonine kinase 3	-0.22	0.50803	3.1285	1.93396	0.0743235	0.791293	-4.35538
159	LARP1B	La ribonucleoprotein domain family, member 1B	-0.22	0.527903	2.93578	1.96353	0.0704833	0.783046	-4.31064
160	TNPO1	transportin 1	-0.22	0.417658	5.29322	2.13812	0.0512866	0.74611	-4.03966
161	CDC42EP3	CDC42 effector protein (Rho GTPase binding) 3	-0.22	0.462054	4.79712	1.43515	0.173965	0.847721	-5.04662
162	ZW10	zw10 kinetochore protein	-0.22	0.412975	4.82006	1.29842	0.215848	0.860466	-5.21119
163	SLFN5	schlafen family member 5	-0.22	0.465228	4.12914	0.770003	0.454539	0.912744	-5.71835
164	ACTR3	ARP3 actin-related protein 3 homolog (yeast)	-0.22	0.40835	5.92753	1.10863	0.286917	0.894139	-5.4183
165	TIMM8A	translocase of inner mitochondrial membrane 8 homolog A (yeast)	-0.22	0.422861	3.43922	1.62474	0.127286	0.845133	-4.79935
166	KIF21A	kinesin family member 21A	-0.21	1.06835	3.28626	1.39719	0.184859	0.850931	-5.09352
167	CNTN4	contactin 4	-0.21	0.390966	1.67666	0.619235	0.546052	0.922529	-5.8203
168	CYP26B1	cytochrome P450, family 26, subfamily B, polypeptide 1	-0.21	0.596137	3.90393	1.17098	0.261824	0.878575	-5.35313
169	OGN	osteoglycin	-0.21	1.30742	4.8345	0.987351	0.340807	0.895752	-5.53652
170	LIMA1	LIM domain and actin binding 1	-0.21	0.673396	5.45868	1.81203	0.0922372	0.822019	-4.53586
171	USP45	ubiquitin specific peptidase 45	-0.21	0.375114	2.28537	1.66956	0.117978	0.845133	-4.73792
172	ERRFI1	ERBB receptor feedback inhibitor 1	-0.21	0.478746	6.8943	1.3333	0.204457	0.858493	-5.17037
173	GABPA	GA binding protein transcription factor, alpha subunit 60kDa	-0.21	0.447973	4.50195	1.90095	0.0788334	0.799272	-4.40488
174	PDK1	pyruvate dehydrogenase kinase, isozyme 1	-0.21	1.92171	2.86558	4.84697	0.000285179	0.182921	0.593768
175	ZNF746	zinc finger protein 746	-0.21	0.391083	3.68353	2.00624	0.0652577	0.778064	-4.24542
176	ZSWIM7	zinc finger, SWIM-type containing 7	-0.21	0.378851	4.93166	0.672819	0.512396	0.912744	-5.78642
177	SARNP	SAP domain containing ribonucleoprotein	-0.21	0.773903	0.756988	2.53775	0.0241682	0.644589	-3.38369
178	EEA1	early endosome antigen 1	-0.21	0.93044	3.46009	2.53897	0.0241119	0.64454	-3.38163
179	OSBPL8	oxysterol binding protein-like 8	-0.21	0.715756	4.76233	3.31315	0.00534237	0.462281	-2.03484
